# Supplementary material for: Synthesis, Structures, and Chiroptical Properties of NBN-Doped Helicenes with Boron Atoms in the Inner Rims
Source: PubMed Central journal article supplement — Precis Chem. 2023 Dec 18;2(1):28–39. doi: 10.1021/prechem.3c00097 (PMC11504388; doi:10.1021/prechem.3c00097), 2023-12-18
Supplement: pc3c00097_si_001.pdf [file pc3c00097_si_001.pdf]

---

# *Supporting Information*

## **Synthesis, Structures, and Chiroptical Properties of NBN-doped Helicenes with Boron Atoms in the Inner Rims**

Weiwen Zhuang<sup>a‡</sup>, Yujian Liu<sup>b‡</sup>, Ziqi Deng<sup>a</sup>, Yu Guo<sup>c</sup>, Philip C.Y. Chow<sup>c</sup>, David Lee Phillips<sup>a</sup>, Wei Jiang<sup>b</sup>, Zhaohui Wang<sup>b\*</sup>, and Junzhi Liu<sup>a\*</sup>

<sup>a</sup>Department of Chemistry and State Key Laboratory of Synthetic Chemistry, The University of Hong Kong, Pokfulam Road, Hong Kong, China

<sup>b</sup>Key Laboratory of Organic Optoelectronics and Molecular Engineering, Department of Chemistry, Tsinghua University, Beijing, China

<sup>c</sup>Department of Mechanical Engineering, The University of Hong Kong, Pokfulam Road, Hong Kong, China

E-mail: [wangzhaohui@mail.tsinghua.edu.cn](mailto:wangzhaohui@mail.tsinghua.edu.cn); [juliu@hku.hk](mailto:juliu@hku.hk)

### **Contents**

|                                                                   |            |
|-------------------------------------------------------------------|------------|
| <b>1. Materials and measurements</b> .....                        | <b>S2</b>  |
| <b>2. Experimental procedures</b> .....                           | <b>S3</b>  |
| <b>3. X-ray crystallography</b> .....                             | <b>S11</b> |
| <b>4. Optical and electrochemical properties</b> .....            | <b>S18</b> |
| <b>5. Chiral resolution and chiroptical properties</b> .....      | <b>S22</b> |
| <b>6. Theoretical calculations</b> .....                          | <b>S27</b> |
| <b>7. NMR spectra and high-resolution mass spectrometry</b> ..... | <b>S40</b> |
| <b>8. References</b> .....                                        | <b>S64</b> |

---

## 1. Materials and measurements

All chemicals were purchased from Dieckmann (Hong Kong) or Energy-Chemical (China). Pd<sub>2</sub>(dba)<sub>3</sub>, tris(dibenzylideneacetone)dipalladium(0); dppf, 1,1'-bis(diphenylphosphino)ferrocene; *t*-BuONa, sodium *tert*-butoxide; *n*-BuLi, *n*-butyllithium; EtOAc, ethyl acetate; DMSO, dimethyl sulfoxide.

<sup>1</sup>H NMR (400 or 600 MHz) and <sup>13</sup>C NMR (100 or 151 MHz) spectra were recorded on a Bruker the Avance DRX Bruker 400 or 600 MHz FTNMR Spectrometer using DMSO-*d*<sub>6</sub>, CDCl<sub>3</sub> or CD<sub>2</sub>Cl<sub>2</sub> as deuterated solvents. Chemical shifts ( $\delta$ ) are reported in ppm. High resolution mass spectra were obtained on a Bruker Q-ToF Maxis II mass spectrometer, a DFS high resolution magnetic sector mass spectrometer or a Bruker Autoflex Speed MALDI TOF MS.

The borylative reaction mixture of compound **8** or **9b** was quenched by cold water and passed through a pad of celite, then concentrated under vacuo. The residue was purified by LaboACE LC-5060 (JAL, Japan) recycling preparative gel permeation chromatography (GPC) assembled with JAIGEL-2.5HR column.

Absorption spectra were measured with Agilent Technologies Cary 60 UV-Vis spectrophotometer in a 1-cm quartz cell. Fluorescence measurements were measured with Agilent Technologies Cary Eclipse fluorescence spectrophotometer at room temperature. Photoluminescence quantum yields ( $\Phi_{\text{PL}}$ ) were determined by HAMAMATSU Quantaurus-QY instrument at room temperature. Time-resolved photoluminescence decays were measured with PicoHarp 300 in a 1-mm quartz cuvette. Femtosecond transient absorption spectra were measured with a femtosecond Ti/Sapphire regenerative amplifier laser system (Spitfire-Pro, Spectra-Physics Company), and an automated data acquisition transient absorption spectrometer (Ultrafast, Helios) was used to record the transient absorption spectra in a 1-mm quartz cuvette.

Cyclic Voltammetry (CV) measurements were carried out on a CHI660E potentiostat (CH Instruments, USA) in a three-electrode cell in an anhydrous dichloromethane solution of Bu<sub>4</sub>NPF<sub>6</sub> (0.1 M) with a scan rate of 100 mV/s at room temperature. All potentials were further calibrated against ferrocene/ferrocenium (Fc/Fc<sup>+</sup>) by selecting decamethylferrocene (DMFc) as a reference.

Circular dichroism (CD) spectra were collected on JASCO J-1700 circular dichroism spectrometer in toluene. Circularly polarized luminescence (CPL) spectra were collected on JASCO CPL-300 circularly polarized luminescence spectrometer in toluene.

## 2. Experimental procedures

Synthesis of *N*-(2-bromo-5-(*tert*-butyl)-3-iodophenyl)naphthalen-2-amine (**3**):

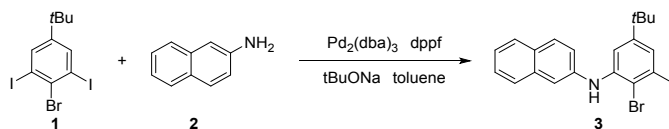

A mixture of **1**<sup>[S1]</sup> (2.44 g, 5.20 mmol, 1.5 equiv.), naphthalen-2-amine **2** (500 mg, 3.50 mmol, 1.0 equiv.),  $\text{Pd}_2(\text{dba})_3$  (140 mg, 0.16 mmol), dppf (170 mg, 0.32 mmol) and *t*BuONa (500 mg, 5.20 mmol, 1.5 equiv.) were dissolved in toluene (70 mL). The mixture was stirred at 60 °C for 16 h under nitrogen atmosphere. After cooling to room temperature, water was added to quench the reaction. The aqueous solution was extracted with EtOAc (3 x 50 mL). The combined organic layers were washed with brine, dried over anhydrous  $\text{Na}_2\text{SO}_4$ , filtered, and concentrated in vacuo. The residue was subjected to column chromatography with hexane/dichloromethane (*V/V* = 5:1) as the eluent to afford **3** (970 mg, 2.03 mmol, 58% yield) as a white solid.

$^1\text{H}$  NMR (400 MHz,  $\text{CDCl}_3$ )  $\delta$  7.82 (d,  $J$  = 8.0 Hz, 1H), 7.80 (d,  $J$  = 8.0 Hz, 1H), 7.70 (d,  $J$  = 8.0 Hz, 1H), 7.52 (d,  $J$  = 2.3 Hz, 1H), 7.48-7.44 (m, 2H), 7.41-7.36 (m, 2H), 7.31 (dd,  $J$  = 8.0, 2.3 Hz, 1H), 6.36 (br, 1H), 1.25 (s, 9H).  $^{13}\text{C}$  NMR (101 MHz,  $\text{CDCl}_3$ )  $\delta$  152.95, 141.96, 139.50, 134.58, 130.18, 129.53, 129.31, 127.88, 126.97, 126.81, 124.58, 121.32, 116.59, 115.41, 113.56, 102.44, 34.88, 31.18. HRMS (ESI) *m/z* [*M*+*H*]<sup>+</sup> Calcd for  $\text{C}_{20}\text{H}_{20}\text{BrIN}^+$  479.9818; Found 479.9817.

Synthesis of 2-methylphenanthren-3-amine (**8**):

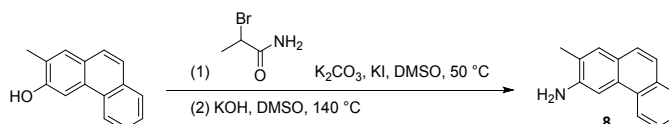

Compound **8** was prepared by the reported Smiles rearrangement reaction<sup>[S2]</sup> with modifications: a 100 mL Schlenk flask was charged with 2-methylphenanthren-3-ol<sup>[S3]</sup> (750 mg, 3.60 mmol, 1.0 equiv.), 2-bromopropanamide (820 mg, 5.40 mmol, 1.5 equiv.),  $\text{K}_2\text{CO}_3$  (750 mg, 5.40 mmol, 1.5 equiv.) and KI (60 mg, 0.36 mmol, 10 mol%). DMSO (18 mL) was then added. The resultant suspension was stirred at 50 °C for 24 hours. The mixture was allowed to cool down to room temperature, KOH (1.21 g, 21.61 mmol, 6.0 equiv.) was finally added, and stirring was continued at 140 °C for 8 hours. The mixture was then cooled to room temperature and saturated  $\text{NH}_4\text{Cl}$  solution (50 mL) was added to quench the reaction. The aqueous solution was extracted with EtOAc (3 x 50 mL). The combined organic layers were washed with brine, dried over anhydrous  $\text{Na}_2\text{SO}_4$ , filtered, and concentrated in vacuo. The residue was subjected

to column chromatography with hexane/EtOAc ( $V/V = 10:1$ ) as the eluent to afford **8** (590 mg, 2.85 mmol, 79% yield) as a brown solid.

$^1\text{H}$  NMR (400 MHz,  $\text{DMSO-}d_6$ )  $\delta$  8.45 (d,  $J = 8.0$  Hz, 1H), 7.84-7.82 (m, 2H), 7.59-7.49 (m, 4H), 7.42 (d,  $J = 8.0$  Hz, 1H), 5.33 (br, 2H), 2.27 (s, 3H).  $^{13}\text{C}$  NMR (101 MHz,  $\text{DMSO-}d_6$ )  $\delta$  146.64, 131.75, 129.73, 129.24, 128.80, 128.22, 126.60, 125.86, 125.68, 124.17, 123.62, 122.25, 121.43, 104.06, 17.68. HRMS (ESI)  $m/z$   $[\text{M}+\text{H}]^+$  Calcd for  $\text{C}_{15}\text{H}_{14}\text{N}^+$  208.1121; Found 208.1119.

General procedure for the Buchwald-Hartwig amination and methylation sequence (**GPA**):

A mixture of aryl iodine, aniline derivatives (1.05 equiv. for one iodine atom),  $\text{Pd}_2(\text{dba})_3$  (10 mol%), dppf (20 mol%) and  $t\text{BuONa}$  (1.05 equiv. for one iodine atom) were dissolved in toluene. The mixture was stirred at 100 °C under nitrogen atmosphere. After completion, the mixture was cooled to room temperature, passed through a pad of celite and rinsed with EtOAc. The obtained organic phase was concentrated in vacuo.

The residue was dissolved in THF.  $\text{NaH}$  (2.0 equiv. for each -NH) was added under nitrogen flow and stirred for 30 minutes at room temperature.  $\text{MeI}$  (2.0 equiv. for each -NH) was finally injected via syringe and the mixture was heated to 65 °C. After completion, water was added to quench the reaction. The aqueous solution was extracted with EtOAc. The combined organic layers were washed with brine, dried over anhydrous  $\text{Na}_2\text{SO}_4$ , filtered, and concentrated in vacuo. The residue was subjected to column chromatography with hexane/dichloromethane ( $V/V =$  from 10:1 to 5:1) as the eluent to afford the linear precursors (Compounds **5**, **6**, **9a**, **9b**, and **10**).

General procedure for the fold-in borylation (**GPB**):

A solution of  $n$ -butyllithium in pentane (1.6 M, 2.0 equiv.) was added slowly to a solution of **5**, **6**, **9a**, **9b**, or **10** (1.0 equiv.) in  $o$ -xylene (0.1 M) at room temperature under a nitrogen atmosphere. After stirring at 50 °C for 30 minutes, the mixture was cooled with ice/water bath (0 °C) and boron tribromide (3.0 equiv.) was slowly injected via a micro syringe. The reaction mixture was stirred at room temperature for 2 h.  $N,N$ -Diisopropylethylamine (Hunig's base, 6.0 equiv.) was added at 0 °C and then the reaction mixture was moved to a 130 °C oil bath and stirred for 12 h. The reaction mixture was cooled to room temperature and saturated  $\text{NH}_4\text{Cl}$  solution was added to quench the reaction. The aqueous solution was extracted with EtOAc. The combined organic layers were washed with brine, dried over anhydrous  $\text{Na}_2\text{SO}_4$ , filtered, and concentrated in vacuo. The residue was subjected to column chromatography with hexane/dichloromethane ( $V/V =$  from 80:1 to 9:1) as the eluent to afford **BN-[5]H**, **BN-[6]H**, **BN-[7]H**, **E[6]H**, and **E[4]H**, respectively, in racemic forms.

Synthesis of 5-(*tert*-butyl)-3,7-dimethyl-3,7-dihydro-3,7-diaza-11b-boranaphtho[3,2,1-*no*]tetraphene (**BN-[5]H**):

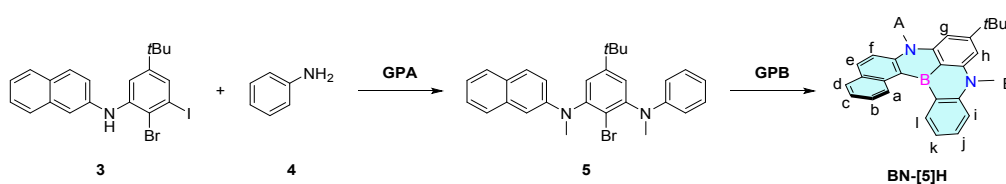

Compound **5** (565 mg, 1.20 mmol, 82% yield, white solid) was prepared by **GPA** using compound **3** (700 mg, 1.46 mmol).  $^1\text{H}$  NMR (400 MHz,  $\text{CDCl}_3$ )  $\delta$  7.68 (d,  $J = 8.4$  Hz, 2H), 7.60 (d,  $J = 9.0$  Hz, 1H), 7.38 (t,  $J = 8.4$  Hz, 1H), 7.26-7.20 (m, 5H), 6.99 (d,  $J = 2.5$  Hz, 1H), 6.80-6.74 (m, 2H), 6.61 (d,  $J = 8.0$  Hz, 2H), 3.38 (s, 3H), 3.30 (s, 3H), 1.27 (s, 9H).  $^{13}\text{C}$  NMR (101 MHz,  $\text{CDCl}_3$ )  $\delta$  153.74, 148.60, 148.48, 148.34, 146.54, 135.09, 129.19, 128.67, 127.70, 127.57, 126.48, 125.92, 125.69, 123.05, 122.56, 117.58, 117.43, 113.07, 106.64, 39.69, 39.35, 35.07, 31.34. HRMS (ESI)  $m/z$   $[\text{M}+\text{H}]^+$  Calcd for  $\text{C}_{28}\text{H}_{30}\text{BrN}_2^+$  473.1592; Found 473.1580.

**BN-[5]H** (40.3 mg, 0.10 mmol, 19% yield, light yellow solid) was prepared by **GPB** using compound **5** (250 mg, 0.53 mmol).  $^1\text{H}$  NMR (600 MHz,  $\text{CD}_2\text{Cl}_2$ )  $\delta$  8.87 (d,  $J = 8.5$  Hz, 1H, *l*), 8.31 (dd,  $J = 7.5, 1.7$  Hz, 1H, *a*), 8.08 (d,  $J = 9.2$  Hz, 1H, *e*), 7.88-7.83 (m, 2H, *f, j*), 7.58-7.61 (m, 1H, *c*), 7.55 (d,  $J = 8.5$  Hz, 1H, *d*), 7.42-7.38 (m, 1H, *i*), 7.38-7.34 (m, 1H, *k*), 7.13 (s, 1H, *g*), 7.09 (s, 1H, *h*), 7.05 (m, 1H, *b*), 4.05 (s, 3H, *A*), 3.95 (s, 3H, *B*), 1.52 (s, 9H, *t*Bu).  $^{13}\text{C}$  NMR (151 MHz,  $\text{CD}_2\text{Cl}_2$ )  $\delta$  156.52, 147.81, 146.39, 145.75, 137.33, 135.83, 132.90, 131.50, 129.72, 128.96, 128.18, 126.02, 124.39, 119.19, 116.91, 115.63, 101.82, 101.34, 37.85, 36.87, 36.50, 32.00. HRMS (ESI)  $m/z$   $[\text{M}]^+$  Calcd for  $\text{C}_{28}\text{H}_{27}\text{BN}_2^+$  402.2262; Found 402.2269.

Synthesis of 9-(*tert*-butyl)-7,11-dimethyl-7,11-dihydro-7,11-diaza-17c-boraphenanthro[2,3,4-*no*]tetraphene (**BN-[6]H**):

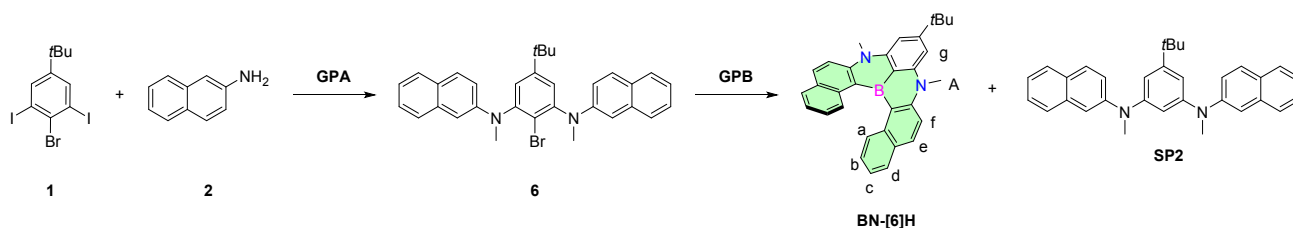

Compound **6** (2.20 g, 4.20 mmol, 84% yield, white solid) was prepared by **GPA** using compound **1** (2.32 g, 5.00 mmol).  $^1\text{H}$  NMR (400 MHz,  $\text{CDCl}_3$ )  $\delta$  7.68 (d,  $J = 8.3$  Hz, 4H), 7.62 (d,  $J = 9.0$  Hz, 2H), 7.38 (m, 2H), 7.27-7.19 (m, 4H), 7.01 (s, 2H), 6.80 (dd,  $J = 9.0, 2.5$  Hz, 2H), 3.39 (s, 6H), 1.26 (s, 9H).  $^{13}\text{C}$  NMR (101 MHz,  $\text{CDCl}_3$ )  $\delta$  153.74, 148.54, 146.53, 135.10, 128.69, 127.72, 127.61, 126.50, 125.70,

122.87, 122.59, 117.44, 106.72, 39.72, 35.07, 31.32. HRMS (MALDI-TOF)  $m/z$  Calcd for  $C_{32}H_{31}BrN_2$  522.1665; Found 522.1670.

**BN-[6]H.** (119.4 mg, 0.26 mmol, 22% yield, light yellow solid) was prepared by **GPB** using compound **6** (630 mg, 1.20 mmol).  $^1H$  NMR (600 MHz,  $CD_2Cl_2$ )  $\delta$  8.11 (d,  $J = 9.2$  Hz, 2H, *e*), 7.91 (d,  $J = 9.2$  Hz, 2H, *f*), 7.89 (d,  $J = 8.3$  Hz, 2H, *a*), 7.83 (d,  $J = 8.0$  Hz, 2H, *d*), 7.27-7.24 (m, 2H, *c*), 7.21 (s, 2H, *g*), 6.91-6.87 (m, 2H, *b*), 4.11 (s, 6H, *A*), 1.54 (s, 9H, *t*Bu).  $^{13}C$  NMR (151 MHz,  $CD_2Cl_2$ )  $\delta$  155.59, 145.86, 144.61, 136.21, 132.78, 129.89, 128.70, 127.92, 126.14, 123.94, 117.06, 101.86, 37.86, 36.48, 32.08. HRMS (MALDI-TOF)  $m/z$  Calcd for  $C_{32}H_{29}BN_2$  452.2418; Found 452.2439.

**SP2.**  $^1H$  NMR (400 MHz,  $CDCl_3$ )  $\delta$  7.72-7.64 (m, 6H), 7.42-7.38 (m, 2H), 7.31-7.24 (m, 6H), 6.86 (d,  $J = 8.4$  Hz, 2H), 6.72 (t,  $J = 8.4$  Hz, 1H), 3.41 (s, 6H), 1.26 (s, 9H).  $^{13}C$  NMR (101 MHz,  $CDCl_3$ )  $\delta$  153.48, 149.66, 146.73, 134.87, 128.91, 128.47, 127.64, 126.76, 126.34, 123.55, 121.47, 113.91, 113.41, 113.16, 40.85, 35.12, 31.43. HRMS (ESI)  $m/z$   $[M+H]^+$  Calcd for  $C_{32}H_{33}N_2^+$  445.2638; Found 445.2650.

Synthesis of 9-(*tert*-butyl)-7,11,12-trimethyl-7,11-dihydro-7,11-diaza-19d-borabenzo[*a*]phenanthro[2,3,4-*no*]tetraphene (**BN-[7]H**):

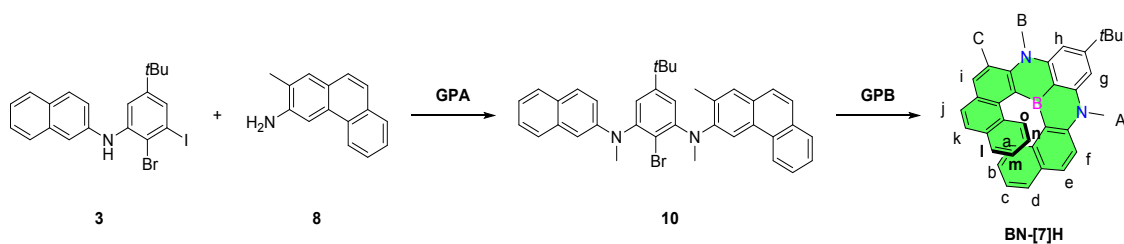

Compound **10** (670 mg, 1.14 mmol, 76% yield, light brown solid) was prepared by **GPA** using compound **3** (720 mg, 1.50 mmol).  $^1H$  NMR (400 MHz,  $CDCl_3$ )  $\delta$  8.65 (d,  $J = 8.2$  Hz, 1H), 8.33 (s, 1H), 7.90 (dd,  $J = 7.8, 1.5$  Hz, 1H), 7.73-7.52 (m, 8H), 7.42-7.32 (m, 1H), 7.21 (t,  $J = 7.4$  Hz, 1H), 7.09 (d,  $J = 2.3$  Hz, 1H), 6.96 (d,  $J = 2.5$  Hz, 1H), 6.91 (d,  $J = 2.4$  Hz, 1H), 6.76 (dd,  $J = 9.0, 2.5$  Hz, 1H), 3.46 (s, 3H), 3.38 (s, 3H), 2.13 (s, 3H), 1.15 (s, 9H).  $^{13}C$  NMR (101 MHz,  $CDCl_3$ )  $\delta$  153.13, 151.44, 148.54, 148.21, 146.63, 135.11, 132.31, 132.23, 131.21, 130.10, 129.53, 128.85, 128.66, 128.34, 127.69, 127.43, 126.47, 126.42, 126.34, 126.31, 125.29, 123.08, 122.57, 122.41, 121.52, 120.23, 117.17, 112.25, 106.34, 41.86, 39.59, 34.98, 31.25, 19.40. HRMS (MALDI-TOF)  $m/z$  Calcd for  $C_{37}H_{35}BrN_2$  586.1978; Found 586.2008.

**BN-[7]H** (124.4 mg, 0.24 mmol, 24% yield, light yellow solid) was prepared by **GPB** using compound **10** (590 mg, 1.00 mmol).  $^1H$  NMR (600 MHz,  $CD_2Cl_2$ )  $\delta$  7.97 (s, 1H, *i*), 7.84-7.79 (m, 2H, *e*, *f*), 7.75 (d,  $J = 8.5$  Hz, 1H, *j*), 7.73 (d,  $J = 8.4$  Hz, 1H, *o*), 7.59 (d,  $J = 8.5$  Hz, 1H, *k*), 7.44 (dd,  $J = 8.0,$

1.3 Hz, 1H, *l*), 7.40 (dd,  $J = 7.9, 1.3$  Hz, 1H, *d*), 7.28 (s, 1H, *h*), 7.27 (s, 1H, *g*), 7.12 (d,  $J = 8.5$  Hz, 1H, *a*), 6.95-6.89 (m, 1H, *m*), 6.89-6.82 (m, 1H, *c*), 6.39 (ddd,  $J = 8.3, 6.8, 1.4$  Hz, 1H, *n*), 6.33 (ddd,  $J = 8.3, 6.7, 1.4$  Hz, 1H, *b*), 4.18 (s, 3H, *B*), 4.00 (s, 3H, *A*), 2.91 (s, 3H, *C*), 1.57 (s, 9H, *tBu*).  $^{13}\text{C}$  NMR (151 MHz,  $\text{CD}_2\text{Cl}_2$ )  $\delta$  155.98, 150.89, 148.83, 145.28, 144.86, 135.83, 135.12, 135.08, 132.99, 132.21, 131.47, 129.30, 128.05, 127.60, 127.25, 127.17, 127.01, 126.93, 125.99, 125.76, 125.34, 124.93, 123.33, 123.07, 116.59, 104.09, 102.45, 46.04, 37.66, 36.44, 32.07, 23.92. HRMS (EI)  $m/z$   $[\text{M}]^+$  Calcd for  $\text{C}_{37}\text{H}_{33}\text{BN}_2^+$  516.2731; Found 516.2734.

Synthesis of 5-(*tert*-butyl)-3,7-dimethyl-3,7-dihydro-3,7-diaza-15b-borabenz[*a*]benzo[5,6]phenanthro[4,3,2-*hi*]tetracene (**E[6]H**) and 8-(*tert*-butyl)-6,10-dimethyl-6,10-dihydro-6,10-diaza-18b-borabenz[*a*]tetrapheno[8,9,10-*hi*]tetracene (**E[4]H**):

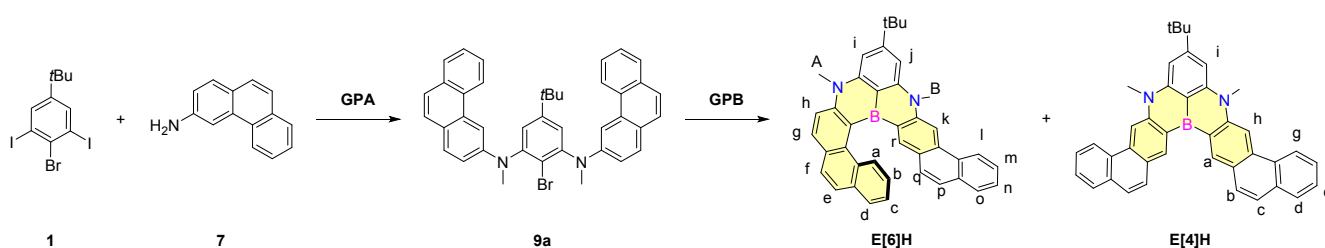

Compound **9a** (770 mg, 1.23 mmol, 72% yield, white solid) was prepared by **GPA** using compound **1** (800 mg, 1.72 mmol).  $^1\text{H}$  NMR (400 MHz,  $\text{CDCl}_3$ )  $\delta$  8.56-8.54 (m, 2H), 7.87-7.84 (m, 4H), 7.71 (d,  $J = 8.0$  Hz, 2H), 7.64-7.51 (m, 8H), 7.40 (s, 2H), 6.92 (dd,  $J = 8.0, 4.0$  Hz, 2H), 3.54 (s, 6H), 1.32 (s, 9H).  $^{13}\text{C}$  NMR (101 MHz,  $\text{CDCl}_3$ )  $\delta$  154.13, 148.56, 147.41, 132.91, 131.74, 129.88, 129.51, 128.73, 126.89, 126.50, 126.08, 125.93, 124.93, 123.39, 123.11, 122.71, 115.79, 103.72, 39.76, 35.20, 31.38. HRMS (ESI)  $m/z$   $[\text{M}+\text{H}]^+$   $\text{C}_{40}\text{H}_{36}\text{BrN}_2^+$  623.2056; Found 623.2041.

**E[6]H** (156.2 mg, 0.28 mmol, 22% yield) and **E[4]H** (15.1 mg, 0.02 mmol, 2% yield) were prepared by **GPB** using compound **9a** (800 mg, 1.28 mmol). No **BN-[8]H** was observed in this reaction. The reaction mixture was first purified by column chromatography with hexane/dichloromethane ( $V/V =$  from 100:1 to 15:1), then further purified by GPC.

**E[6]H**  $^1\text{H}$  NMR (600 MHz,  $\text{CD}_2\text{Cl}_2$ )  $\delta$  8.78 (d,  $J = 8.3$  Hz, 1H, *l*), 8.56 (s, 1H, *k*), 8.20 (dd,  $J = 8.7, 4.2$  Hz, 2H, *g, a*), 7.98 (d,  $J = 9.0$  Hz, 1H, *h*), 7.92 (d,  $J = 8.5$  Hz, 1H, *f*), 7.89-7.84 (m, 2H, *d, e*), 7.76 (dd,  $J = 7.7, 1.4$  Hz, 1H, *o*), 7.64 (ddd,  $J = 8.3, 6.9, 1.4$  Hz, 1H, *n*), 7.56 (td,  $J = 7.4, 1.2$  Hz, 1H, *m*), 7.49 (s, 1H, *r*), 7.33-7.23 (m, 3H, *i, p, j*), 7.20 (ddd,  $J = 8.0, 6.8, 1.2$  Hz, 1H, *c*), 6.86 (d,  $J = 8.8$  Hz, 1H, *q*), 6.72 (ddd,  $J = 8.3, 6.8, 1.4$  Hz, 1H, *b*), 4.22 (s, 3H, *B*), 4.17 (s, 3H, *A*), 1.60 (s, 9H, *tBu*).  $^{13}\text{C}$  NMR (151 MHz,  $\text{CD}_2\text{Cl}_2$ )  $\delta$  157.25, 147.44, 146.71, 146.24, 145.97, 136.52, 136.37, 133.62, 133.44, 133.27, 132.89, 132.14, 131.14, 130.33, 128.97, 127.66, 127.63, 127.33, 126.86, 126.58, 126.50, 126.49, 125.68, 125.47,

124.19, 123.94, 123.27, 116.40, 106.71, 102.44, 101.96, 37.63, 37.30, 36.66, 32.05. HRMS (MALDI-TOF)  $m/z$  Calcd for  $C_{40}H_{33}BN_2$  552.2731; Found 552.2740.

**E[4]H**  $^1H$  NMR (600 MHz,  $CD_2Cl_2$ )  $\delta$  9.40 (s, 2H, *a*), 8.91 (d,  $J = 8.1$  Hz, 2H, *g*), 8.79 (s, 2H, *h*), 8.04 (d,  $J = 8.7$  Hz, 2H, *b*), 7.96 (dd,  $J = 7.8, 1.4$  Hz, 2H, *d*), 7.77-7.67 (m, 6H, *f, e, c*), 7.21 (s, 2H, *i*), 4.20 (s, 6H, *Me*), 1.58 (s, 9H, *tBu*).  $^{13}C$  NMR (151 MHz,  $CD_2Cl_2$ )  $\delta$  158.27, 147.45, 146.75, 136.85, 133.66, 133.32, 130.55, 129.25, 128.16, 127.83, 126.78, 126.43, 124.89, 123.58, 107.35, 102.02, 37.62, 36.76, 31.99. HRMS (MALDI-TOF)  $m/z$  Calcd for  $C_{40}H_{33}BN_2$  552.2731; Found 552.2751.

Synthesis of 2-bromo-5-(*tert*-butyl)- $N^1,N^3$ -dimethyl- $N^1,N^3$ -bis(2-methylphenanthren-3-yl)benzene-1,3-diamine (**9b**) and attempts towards 11-(*tert*-butyl)-8,9,13,14-tetramethyl-9,13-dihydro-9,13-diaza-21d-borabenz[*a*]benzo[5,6]phenanthro[2,3,4-*no*]tetraphene (**BN-[8]H-Me**):

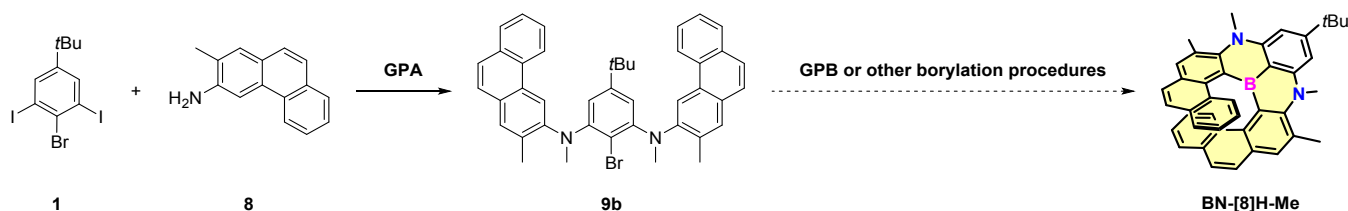

Compound **9b** (440 mg, 0.68 mmol, 63% yield, white solid) was prepared by **GPA** using compound **1** (500 mg, 1.08 mmol).  $^1H$  NMR (400 MHz,  $CDCl_3$ )  $\delta$  8.64 (d,  $J = 8.2$  Hz, 2H), 8.33 (s, 2H), 7.89 (dd,  $J = 7.9, 1.5$  Hz, 2H), 7.69-7.56 (m, 8H), 6.68 (s, 2H), 3.46 (s, 6H), 2.07 (s, 6H), 0.97 (s, 9H).  $^{13}C$  NMR (151 MHz,  $CDCl_3$ )  $\delta$  152.39, 151.28, 148.54, 132.26, 132.23, 131.12, 130.11, 129.52, 128.83, 128.16, 126.47, 126.28, 125.14, 122.60, 119.23, 117.42, 111.87, 41.96, 34.85, 31.13, 19.51. HRMS (ESI)  $m/z$   $[M+H]^+$   $C_{42}H_{40}BrN_2^+$  651.2369; Found 651.2345.

Although we tried to modified **GPB** (adjusted the amount of different reagents, reaction temperature, or time) and applied several other borylation conditions to synthesize **BN-[8]H-Me**, no desired product was obtained.

Other borylation procedures:

(a). A solution of *n*-butyllithium in pentane (1.6 M, 2.0 equiv.) was added slowly to a solution of **9b** (1.0 equiv.) in *o*-xylene or *tert*-butylbenzene (0.1 M) at room temperature under a nitrogen atmosphere. After stirring at 50 °C for 30 minutes, the mixture was cooled with ice/water bath (0 °C) and boron tribromide (3.0 equiv.) was slowly injected via a micro syringe. The reaction mixture was stirred at room temperature for 2 h. Pempidine (6.0 equiv.) was added at 0 °C and then the reaction mixture was moved to a 130 °C oil bath and stirred for 12 h. The reaction mixture was cooled to room temperature and saturated  $NH_4Cl$  solution was added to quench the reaction. The aqueous solution was extracted with EtOAc. The combined organic layers were washed with brine, dried over anhydrous  $Na_2SO_4$ , filtered, and



concentrated in vacuo. Passed through a pad of celite. The residue was analyzed by GPC and MS (MALDI-TOF).

(b). A solution of *n*-butyllithium in pentane (1.6 M, 2.0 equiv.) was added slowly to a solution of **9b** (1.0 equiv.) in 1,2-dichlorobenzene (0.1 M) at room temperature under a nitrogen atmosphere. After stirring at rt for 12 hours, the mixture was cooled with ice/water bath (0 °C) and boron tribromide (3.0 equiv.) was slowly injected via a micro syringe. The reaction mixture was stirred at room temperature for 2 h. Pempidine or Hunig's base (6.0 equiv.) was added at 0 °C and then the reaction mixture was moved to a 180 °C oil bath and stirred for 12 h. The reaction mixture was cooled to room temperature and saturated NH<sub>4</sub>Cl solution was added to quench the reaction. The aqueous solution was extracted with EtOAc. The combined organic layers were washed with brine, dried over anhydrous Na<sub>2</sub>SO<sub>4</sub>, filtered, and concentrated in vacuo. Passed through a pad of celite. The residue was analyzed by GPC and MS (MALDI-TOF).

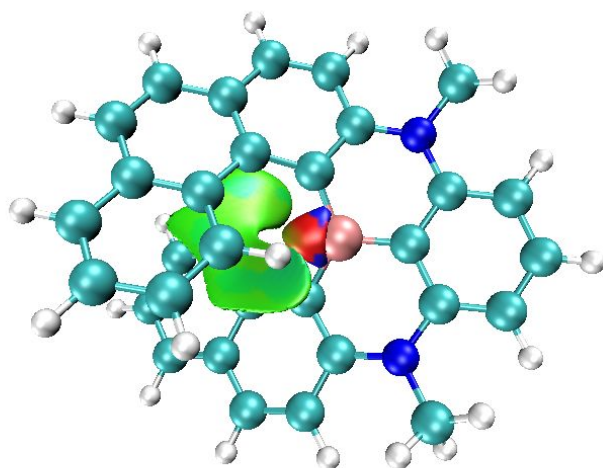

**Figure S1** The independent gradient model analysis based on Hirshfeld partition (IGMH) isosurface (green color) of  $\delta g^{\text{inter}}$  (isovalue=0.005) for **BN-[7]H**. Isosurface color code: red—repulsions, green—van der Waals interactions, blue—strong attraction.

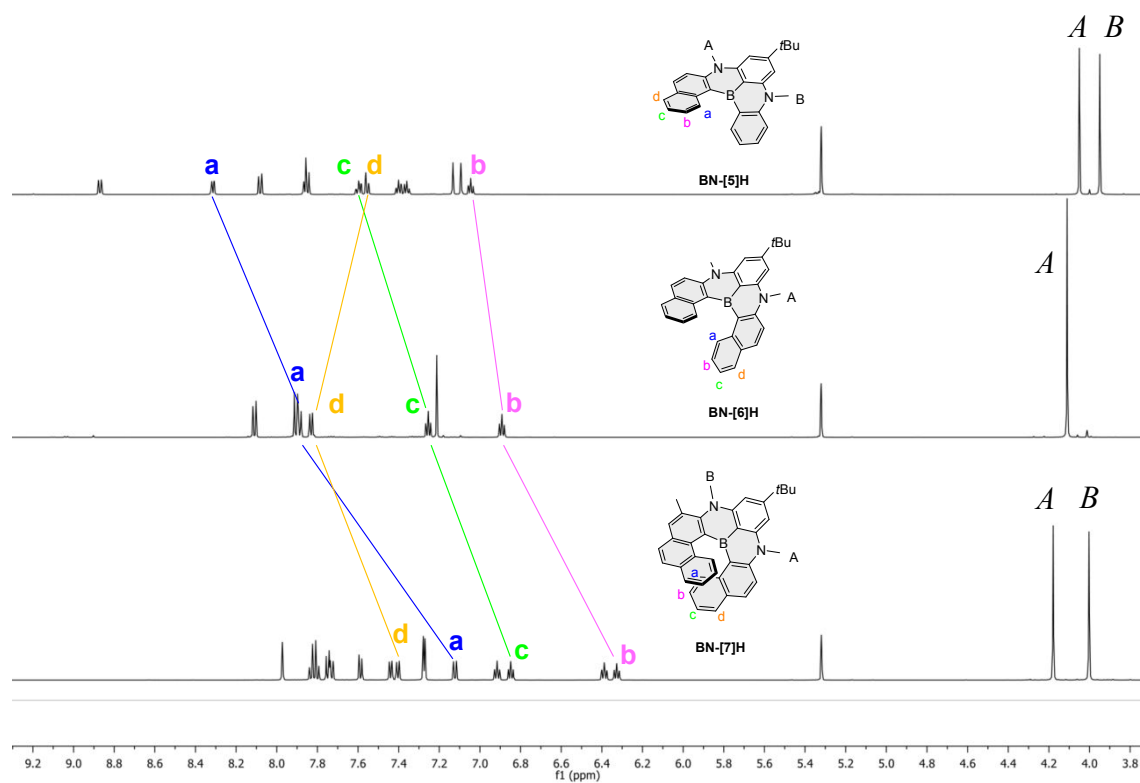

**Figure S2**  $^1\text{H}$  NMR spectra of **BN-[n]H** (top:  $n=5$ ; middle:  $n=6$ ; bottom:  $n=7$ ) in  $\text{CD}_2\text{Cl}_2$  at 298 K (600 MHz).

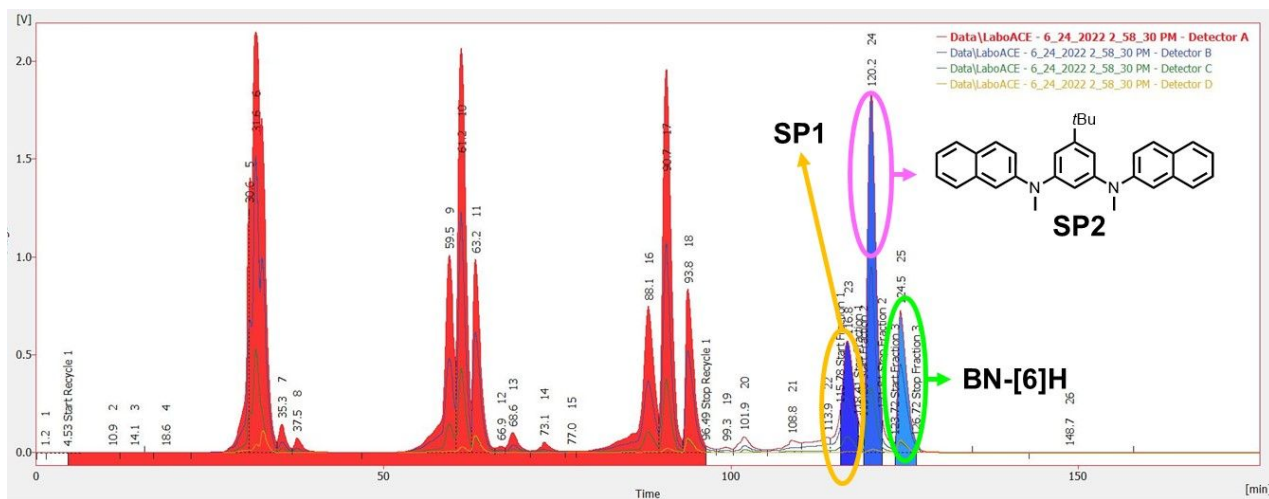

**Figure S3** Recycling-GPC trace of the borylative reaction affording **BN-[6]H**.

### 3. X-ray crystallography

Single crystals of **BN-[5]H**, **BN-[6]H**, **BN-[7]H**, **E[6]H**, and **E[4]H** were obtained by slow diffusion of methanol into toluene solutions. XtaLAB Synergy, Dualflex, HyPix diffractometer; Bruker APEX-II CCD diffractometer; and XtaLAB AFC12 (RINC): Kappa single diffractometer were used for crystal screening, unit cell determination, and data collection for the X-ray crystal structure of **BN-[5]H**; **BN-[6]H**; **BN-[7]H**, **E[6]H**, and **E[4]H**, respectively. The X-ray crystallographic coordinates for structures reported in this article have been deposited at Cambridge Crystallographic Data Centre (CCDC), under deposition number, CCDC 2235573 for **BN-[5]H**, CCDC 2235575 for **BN-[6]H**, CCDC 2235579 for **BN-[7]H**, CCDC 2239651 for **E[6]H**, CCDC 2239653 for **E[4]H**. These data can be obtained free of charge from CCDC via <https://www.ccdc.cam.ac.uk/structures/>.

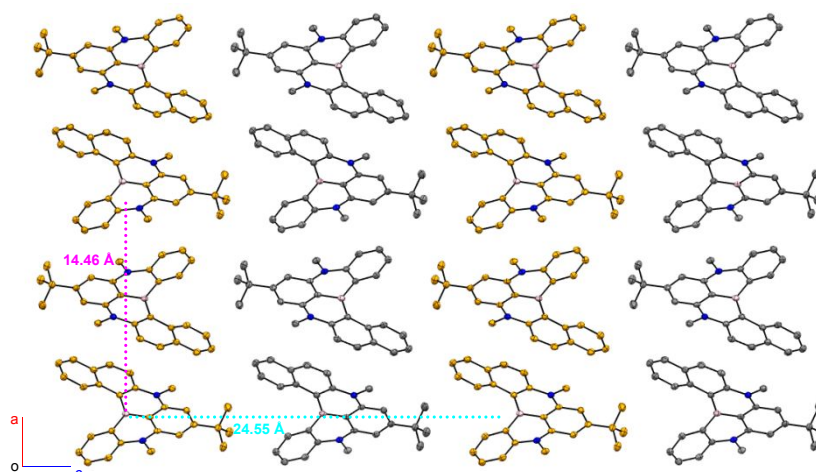

**Figure S4** Molecular packing of **BN-[5]H**. All the hydrogen atoms are omitted for clarity.

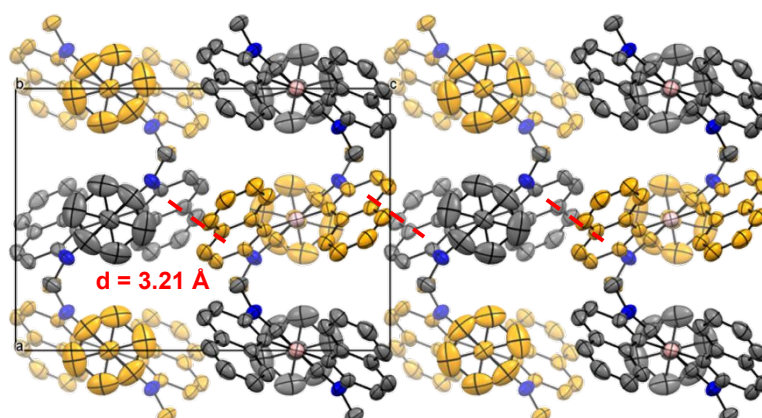

**Figure S5** Molecular packing of **BN-[6]H**. All the hydrogen atoms are omitted for clarity. Disorder of *tert*-butyl groups was observed.

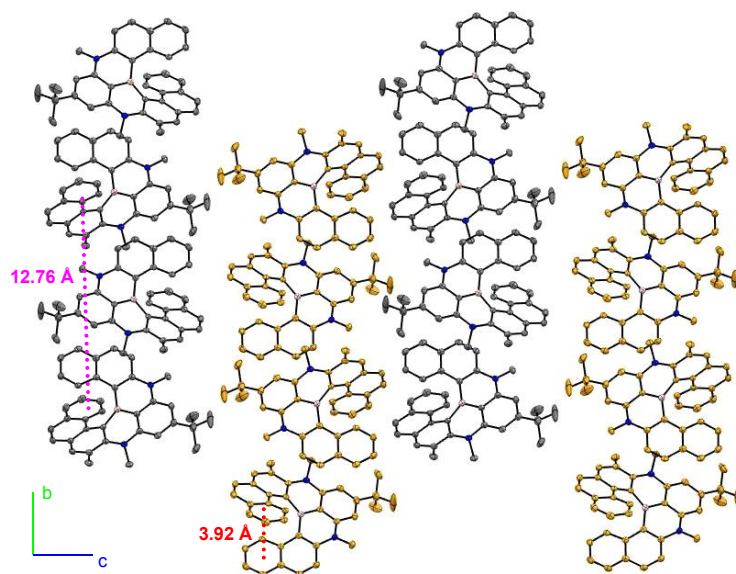

**Figure S6** Molecular packing of **BN-[7]H**. All the hydrogen atoms are omitted for clarity.

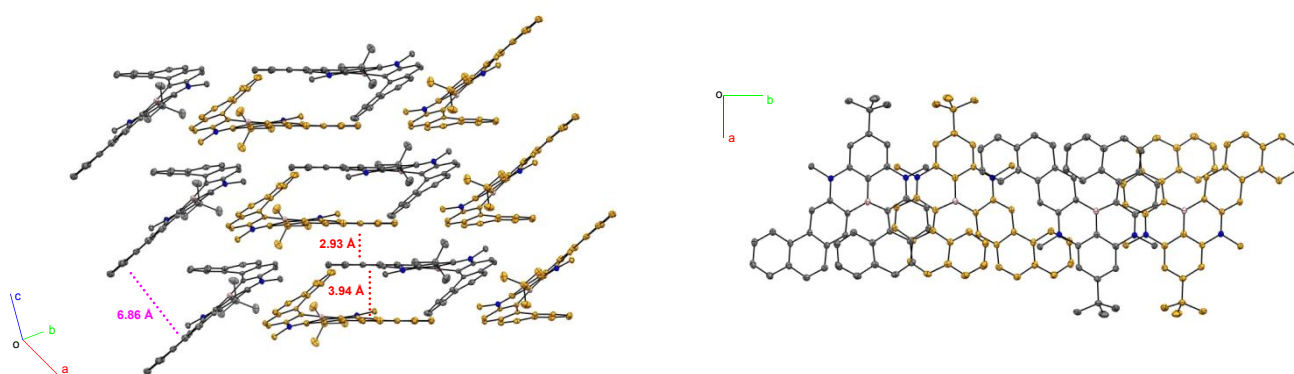

**Figure S7** Molecular packing of **E[6]H**. All the hydrogen atoms are omitted for clarity.

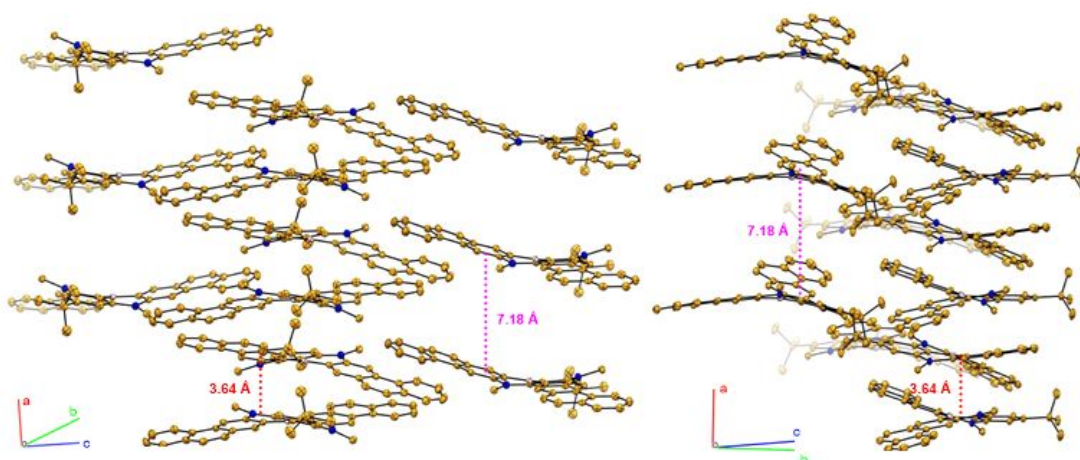

**Figure S8** Molecular packing of **E[4]H**. All the hydrogen atoms are omitted for clarity.

**Table S1.** Crystallographic data and details of the structural refinements of **BN-[5]H**.

|                                                              |                                                                              |
|--------------------------------------------------------------|------------------------------------------------------------------------------|
| Compound name                                                | <b>BN-[5]H</b>                                                               |
| CCDC number                                                  | 2235573                                                                      |
| Empirical formula                                            | C <sub>28</sub> H <sub>27</sub> BN <sub>2</sub>                              |
| Formula weight                                               | 406.23                                                                       |
| Temperature/K                                                | 100.00(10)                                                                   |
| Crystal system                                               | monoclinic                                                                   |
| Space group                                                  | <i>P</i> 2 <sub>1</sub> / <i>c</i>                                           |
| <i>a</i> /Å                                                  | 14.4557(3)                                                                   |
| <i>b</i> /Å                                                  | 6.00320(10)                                                                  |
| <i>c</i> /Å                                                  | 24.5572(5)                                                                   |
| $\alpha$ /°                                                  | 90                                                                           |
| $\beta$ /°                                                   | 90.757(2)                                                                    |
| $\gamma$ /°                                                  | 90                                                                           |
| Volume/Å <sup>3</sup>                                        | 2130.90(7)                                                                   |
| <i>Z</i>                                                     | 4                                                                            |
| $\rho_{\text{calc}}$ /g/cm <sup>3</sup>                      | 1.266                                                                        |
| $\mu$ /mm <sup>-1</sup>                                      | 0.560                                                                        |
| F(000)                                                       | 865.0                                                                        |
| Crystal size/mm <sup>3</sup>                                 | 0.1 × 0.04 × 0.04                                                            |
| Radiation                                                    | CuK $\alpha$ ( $\lambda$ = 1.54184)                                          |
| 2 $\Theta$ range for data collection/°                       | 6.114 to 143.358                                                             |
| Index ranges                                                 | -17 ≤ <i>h</i> ≤ 17, -2 ≤ <i>k</i> ≤ 7, -30 ≤ <i>l</i> ≤ 29                  |
| Reflections collected                                        | 12832                                                                        |
| Independent reflections                                      | 3950 [ <i>R</i> <sub>int</sub> = 0.0383, <i>R</i> <sub>sigma</sub> = 0.0409] |
| Data/restraints/parameters                                   | 3950/0/285                                                                   |
| Goodness-of-fit on <i>F</i> <sup>2</sup>                     | 1.053                                                                        |
| Final <i>R</i> indexes [ <i>I</i> ≥ 2 $\sigma$ ( <i>I</i> )] | <i>R</i> <sub>1</sub> = 0.0428, <i>wR</i> <sub>2</sub> = 0.1105              |
| Final <i>R</i> indexes [all data]                            | <i>R</i> <sub>1</sub> = 0.0510, <i>wR</i> <sub>2</sub> = 0.1167              |
| Largest diff. peak/hole / e Å <sup>-3</sup>                  | 0.36/-0.22                                                                   |

**Table S2.** Crystallographic data and details of the structural refinements of **BN-[6]H**.

|                                             |                                                                |
|---------------------------------------------|----------------------------------------------------------------|
| Compound name                               | <b>BN-[6]H</b>                                                 |
| CCDC number                                 | 2235575                                                        |
| Empirical formula                           | C <sub>32</sub> H <sub>29</sub> BN <sub>2</sub>                |
| Formula weight                              | 452.38                                                         |
| Temperature/K                               | 301.00                                                         |
| Crystal system                              | orthorhombic                                                   |
| Space group                                 | <i>Pbcn</i>                                                    |
| <i>a</i> /Å                                 | 10.9917(4)                                                     |
| <i>b</i> /Å                                 | 14.1697(5)                                                     |
| <i>c</i> /Å                                 | 15.7360(6)                                                     |
| $\alpha$ /°                                 | 90                                                             |
| $\beta$ /°                                  | 90                                                             |
| $\gamma$ /°                                 | 90                                                             |
| Volume/Å <sup>3</sup>                       | 2450.87(16)                                                    |
| Z                                           | 4                                                              |
| $\rho_{\text{calc}}$ /g/cm <sup>3</sup>     | 1.226                                                          |
| $\mu$ /mm <sup>-1</sup>                     | 0.070                                                          |
| F(000)                                      | 960.0                                                          |
| Crystal size/mm <sup>3</sup>                | 0.4 × 0.1 × 0.1                                                |
| Radiation                                   | MoK $\alpha$ ( $\lambda$ = 0.71073)                            |
| 2 $\Theta$ range for data collection/°      | 4.69 to 56.576                                                 |
| Index ranges                                | -14 ≤ <i>h</i> ≤ 14, -18 ≤ <i>k</i> ≤ 18, -20 ≤ <i>l</i> ≤ 20  |
| Reflections collected                       | 22940                                                          |
| Independent reflections                     | 3048 [ $R_{\text{int}}$ = 0.0531, $R_{\text{sigma}}$ = 0.0282] |
| Data/restraints/parameters                  | 3048/10/178                                                    |
| Goodness-of-fit on F <sup>2</sup>           | 1.055                                                          |
| Final R indexes [ $I \geq 2\sigma(I)$ ]     | $R_1$ = 0.0463, $wR_2$ = 0.1201                                |
| Final R indexes [all data]                  | $R_1$ = 0.0730, $wR_2$ = 0.1444                                |
| Largest diff. peak/hole / e Å <sup>-3</sup> | 0.15/-0.18                                                     |

**Table S3.** Crystallographic data and details of the structural refinements of **BN-[7]H**.

|                                               |                                                               |
|-----------------------------------------------|---------------------------------------------------------------|
| Compound name                                 | <b>BN-[7]H</b>                                                |
| CCDC number                                   | 2235579                                                       |
| Empirical formula                             | $C_{37}H_{33}BN_2$                                            |
| Formula weight                                | 516.46                                                        |
| Temperature/K                                 | 99.98(11)                                                     |
| Crystal system                                | monoclinic                                                    |
| Space group                                   | $P2_1/n$                                                      |
| $a/\text{\AA}$                                | 7.97733(6)                                                    |
| $b/\text{\AA}$                                | 14.84806(11)                                                  |
| $c/\text{\AA}$                                | 23.76860(16)                                                  |
| $\alpha/^\circ$                               | 90                                                            |
| $\beta/^\circ$                                | 92.2615(7)                                                    |
| $\gamma/^\circ$                               | 90                                                            |
| Volume/ $\text{\AA}^3$                        | 2813.15(3)                                                    |
| Z                                             | 4                                                             |
| $\rho_{\text{calc}}/\text{g/cm}^3$            | 1.219                                                         |
| $\mu/\text{mm}^{-1}$                          | 0.531                                                         |
| F(000)                                        | 1096.0                                                        |
| Crystal size/ $\text{mm}^3$                   | $0.02 \times 0.014 \times 0.01$                               |
| Radiation                                     | Cu $K\alpha$ ( $\lambda = 1.54184$ )                          |
| $2\Theta$ range for data collection/ $^\circ$ | 9.536 to 155.338                                              |
| Index ranges                                  | $-10 \leq h \leq 7, -16 \leq k \leq 18, -30 \leq l \leq 27$   |
| Reflections collected                         | 14611                                                         |
| Independent reflections                       | 5722 [ $R_{\text{int}} = 0.0167, R_{\text{sigma}} = 0.0179$ ] |
| Data/restraints/parameters                    | 5722/1032/367                                                 |
| Goodness-of-fit on $F^2$                      | 1.037                                                         |
| Final R indexes [ $I \geq 2\sigma(I)$ ]       | $R_1 = 0.0428, wR_2 = 0.1080$                                 |
| Final R indexes [all data]                    | $R_1 = 0.0448, wR_2 = 0.1093$                                 |
| Largest diff. peak/hole / $e \text{\AA}^{-3}$ | 0.27/-0.32                                                    |

**Table S4.** Crystallographic data and details of the structural refinements of **E[6]H**.

|                                                                   |                                                                                           |
|-------------------------------------------------------------------|-------------------------------------------------------------------------------------------|
| Compound name                                                     | <b>E[6]H</b>                                                                              |
| CCDC number                                                       | 2239651                                                                                   |
| Empirical formula                                                 | C <sub>40</sub> H <sub>33</sub> BN <sub>2</sub>                                           |
| Formula weight                                                    | 552.49                                                                                    |
| Temperature/K                                                     | 293(2)                                                                                    |
| Crystal system                                                    | monoclinic                                                                                |
| Space group                                                       | <i>P</i> 2 <sub>1</sub> / <i>c</i>                                                        |
| <i>a</i> /Å                                                       | 13.6942(2)                                                                                |
| <i>b</i> /Å                                                       | 28.8541(4)                                                                                |
| <i>c</i> /Å                                                       | 7.36970(10)                                                                               |
| $\alpha$ /°                                                       | 90                                                                                        |
| $\beta$ /°                                                        | 91.5540(10)                                                                               |
| $\gamma$ /°                                                       | 90                                                                                        |
| Volume/Å <sup>3</sup>                                             | 2910.95(7)                                                                                |
| <i>Z</i>                                                          | 4                                                                                         |
| $\rho_{\text{calc}}$ /cm <sup>3</sup>                             | 1.261                                                                                     |
| $\mu$ /mm <sup>-1</sup>                                           | 0.550                                                                                     |
| F(000)                                                            | 1168.0                                                                                    |
| Radiation                                                         | Cu K $\alpha$ ( $\lambda$ = 1.54178)                                                      |
| 2 $\Theta$ range for data collection/°                            | 6.126 to 155.298                                                                          |
| Index ranges                                                      | -17 $\leq$ <i>h</i> $\leq$ 16, -36 $\leq$ <i>k</i> $\leq$ 36, -8 $\leq$ <i>l</i> $\leq$ 9 |
| Reflections collected                                             | 17874                                                                                     |
| Independent reflections                                           | 5947 [ <i>R</i> <sub>int</sub> = 0.0360, <i>R</i> <sub>sigma</sub> = 0.0463]              |
| Data/restraints/parameters                                        | 5947/0/393                                                                                |
| Goodness-of-fit on F <sup>2</sup>                                 | 0.652                                                                                     |
| Final <i>R</i> indexes [ <i>I</i> $\geq$ 2 $\sigma$ ( <i>I</i> )] | <i>R</i> <sub>1</sub> = 0.0561, <i>wR</i> <sub>2</sub> = 0.1800                           |
| Final <i>R</i> indexes [all data]                                 | <i>R</i> <sub>1</sub> = 0.0723, <i>wR</i> <sub>2</sub> = 0.1924                           |
| Largest diff. peak/hole / e Å <sup>-3</sup>                       | 0.31/-0.21                                                                                |



**Table S5.** Crystallographic data and details of the structural refinements of **E[4]H**.

|                                                                   |                                                                                           |
|-------------------------------------------------------------------|-------------------------------------------------------------------------------------------|
| Compound name                                                     | <b>E[4]H</b>                                                                              |
| CCDC number                                                       | 2239653                                                                                   |
| Empirical formula                                                 | C <sub>40</sub> H <sub>33</sub> BN <sub>2</sub>                                           |
| Formula weight                                                    | 552.49                                                                                    |
| Temperature/K                                                     | 293(2)                                                                                    |
| Crystal system                                                    | orthorhombic                                                                              |
| Space group                                                       | <i>P</i> 2 <sub>1</sub> 2 <sub>1</sub> 2 <sub>1</sub>                                     |
| <i>a</i> /Å                                                       | 7.18200(10)                                                                               |
| <i>b</i> /Å                                                       | 15.6780(2)                                                                                |
| <i>c</i> /Å                                                       | 25.7919(3)                                                                                |
| $\alpha$ /°                                                       | 90                                                                                        |
| $\beta$ /°                                                        | 90                                                                                        |
| $\gamma$ /°                                                       | 90                                                                                        |
| Volume/Å <sup>3</sup>                                             | 2904.15(6)                                                                                |
| <i>Z</i>                                                          | 4                                                                                         |
| $\rho_{\text{calc}}$ /g/cm <sup>3</sup>                           | 1.264                                                                                     |
| $\mu$ /mm <sup>-1</sup>                                           | 0.552                                                                                     |
| F(000)                                                            | 1168.0                                                                                    |
| Radiation                                                         | Cu K $\alpha$ ( $\lambda$ = 1.54178)                                                      |
| 2 $\Theta$ range for data collection/°                            | 6.598 to 155.356                                                                          |
| Index ranges                                                      | -9 $\leq$ <i>h</i> $\leq$ 8, -17 $\leq$ <i>k</i> $\leq$ 19, -32 $\leq$ <i>l</i> $\leq$ 31 |
| Reflections collected                                             | 14229                                                                                     |
| Independent reflections                                           | 5507 [ <i>R</i> <sub>int</sub> = 0.0680, <i>R</i> <sub>sigma</sub> = 0.0858]              |
| Data/restraints/parameters                                        | 5507/0/393                                                                                |
| Goodness-of-fit on F <sup>2</sup>                                 | 0.796                                                                                     |
| Final <i>R</i> indexes [ <i>I</i> $\geq$ 2 $\sigma$ ( <i>I</i> )] | <i>R</i> <sub>1</sub> = 0.0504, <i>wR</i> <sub>2</sub> = 0.1378                           |
| Final <i>R</i> indexes [all data]                                 | <i>R</i> <sub>1</sub> = 0.0757, <i>wR</i> <sub>2</sub> = 0.1426                           |
| Largest diff. peak/hole / e Å <sup>-3</sup>                       | 0.24/-0.29                                                                                |
| Flack parameter                                                   | 0.9(4)                                                                                    |

## 4. Optical and electrochemical properties

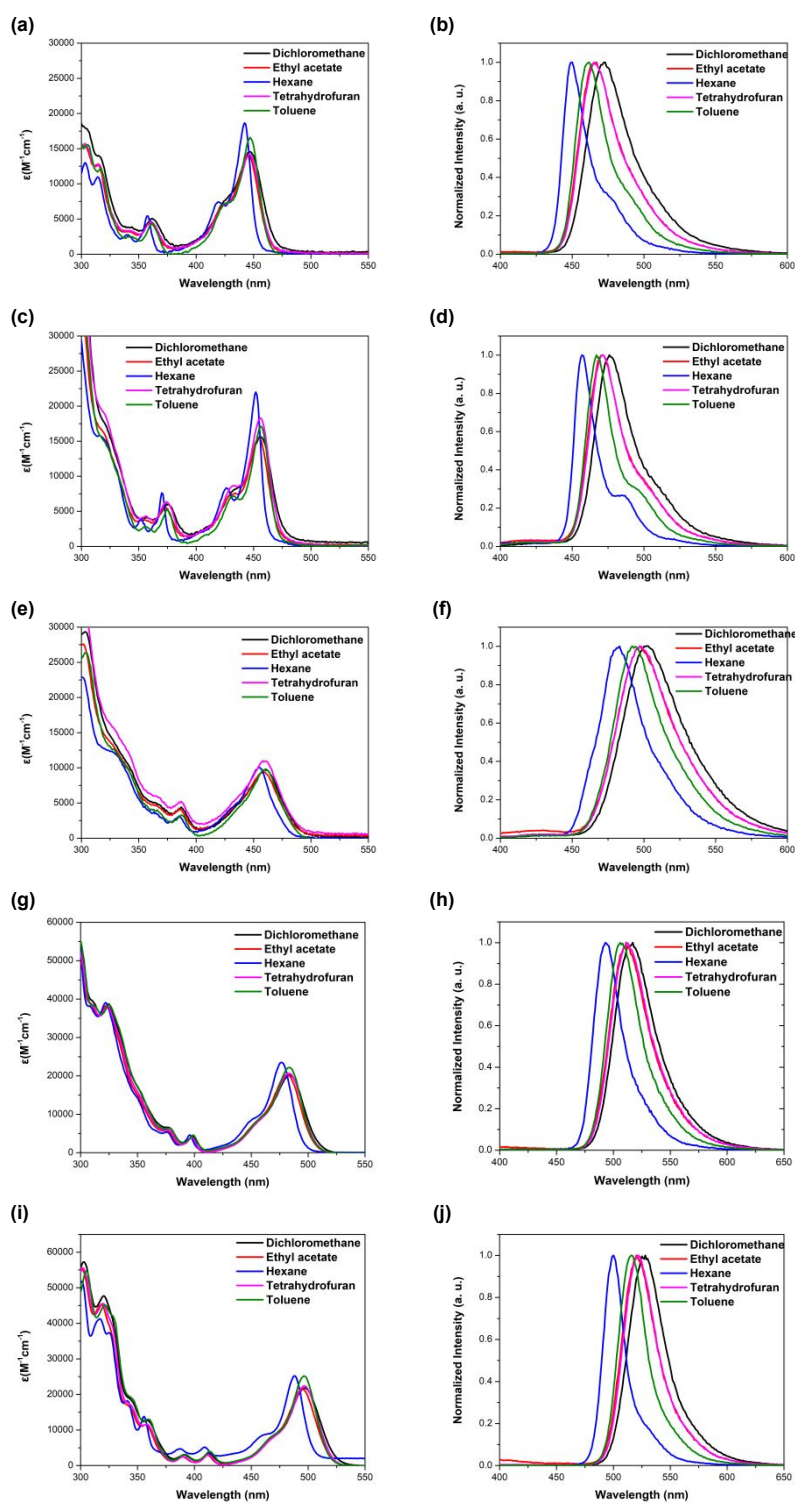

**Figure S9** UV-Vis absorption (left) and normalized fluorescence emission (right) spectra of **BN-[5]H** (a and b), **BN-[6]H** (c and d), **BN-[7]H** (e and f), **E[6]H** (g and h), and **E[4]H** (i and j) in different solutions ( $1 \times 10^{-5}$  M).

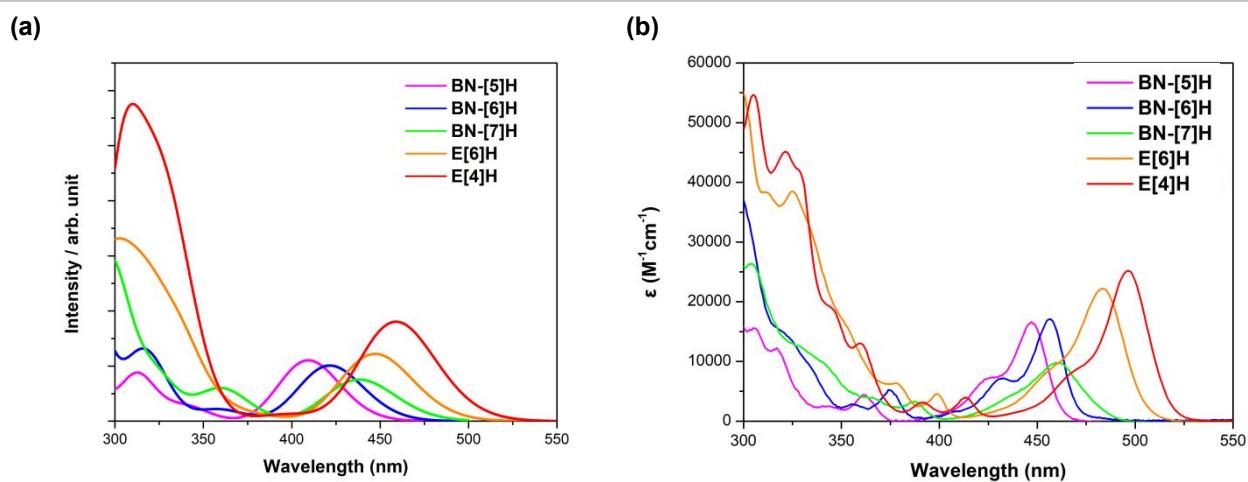

**Figure S10** (a) Calculated UV-Vis spectra of NBN-doped helicenes at the PBE0/6-311G(d) level. (b) Measured UV-Vis spectra of NBN-doped helicenes in toluene.

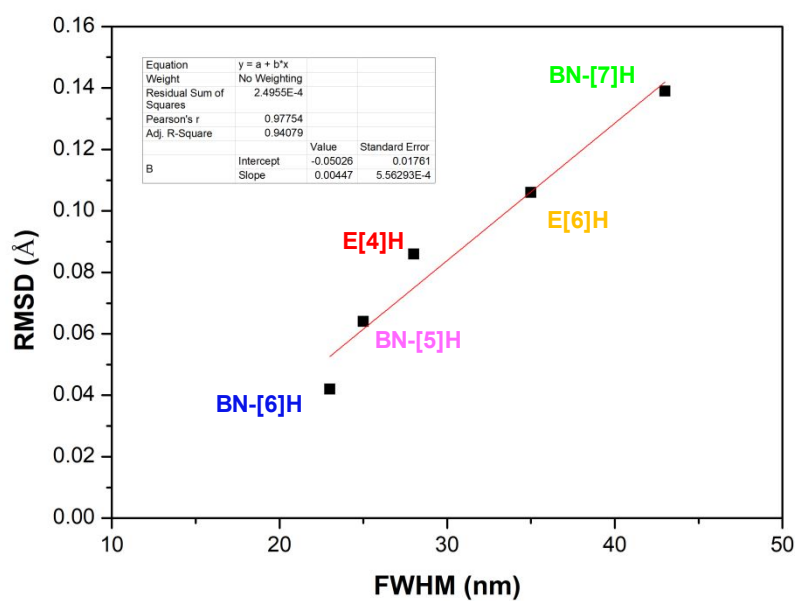

**Figure S11** The correlation between full-width at half-maximum (FWHM) and root-mean-square deviation of atomic positions (RMSD) between the ground states ( $S_0$ ) and the lowest singlet states ( $S_1$ ) calculated at the (TD)B3LYP/6-31G(d) level.

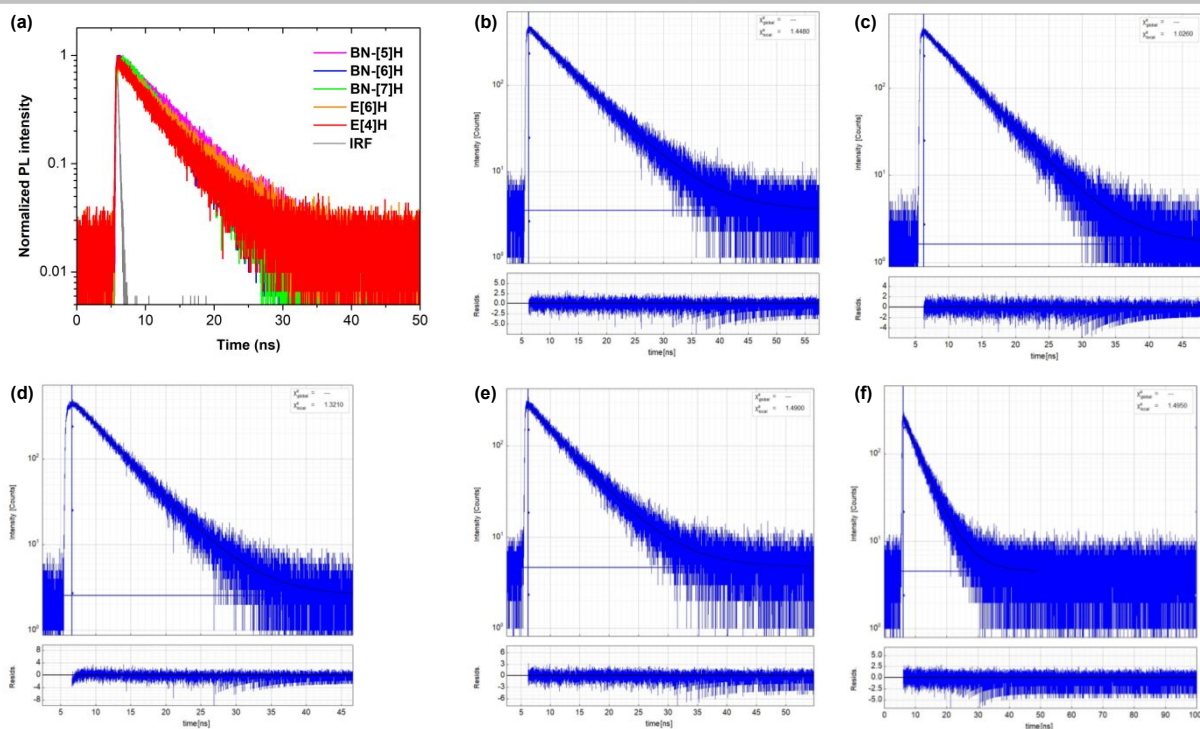

**Figure S12** Time-resolved photoluminescence (TRPL) decays of (a) NBN-doped helicenes and IRF, (b) BN-[5]H, (c) BN-[6]H, (d) BN-[7]H, (e) E[6]H, and (f) E[4]H.

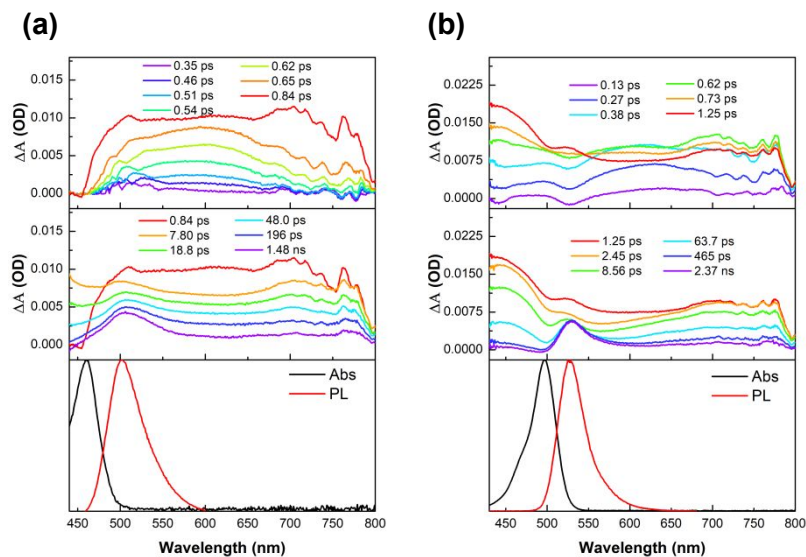

**Figure S13** Femtosecond transient absorption spectra (top for early spectral conversion and middle for the late-time process) and steady-state absorption/emission spectra (bottom) in dichloromethane of (a) BN-[7]H and (b) E[4]H.

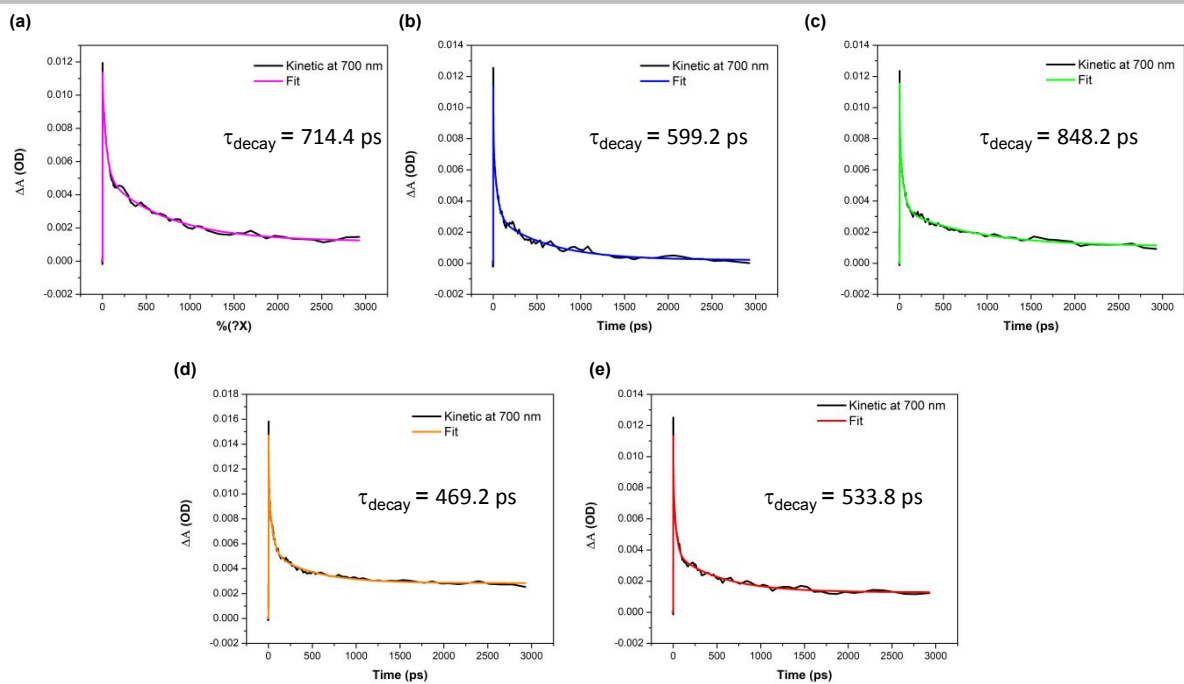

**Figure S14** Kinetic profiles at 700 nm of fs-TA spectra of (a) **BN-[5]H**, (b) **BN-[6]H**, (c) **BN-[7]H**, (d) **E[6]H**, and (e) **E[4]H**.

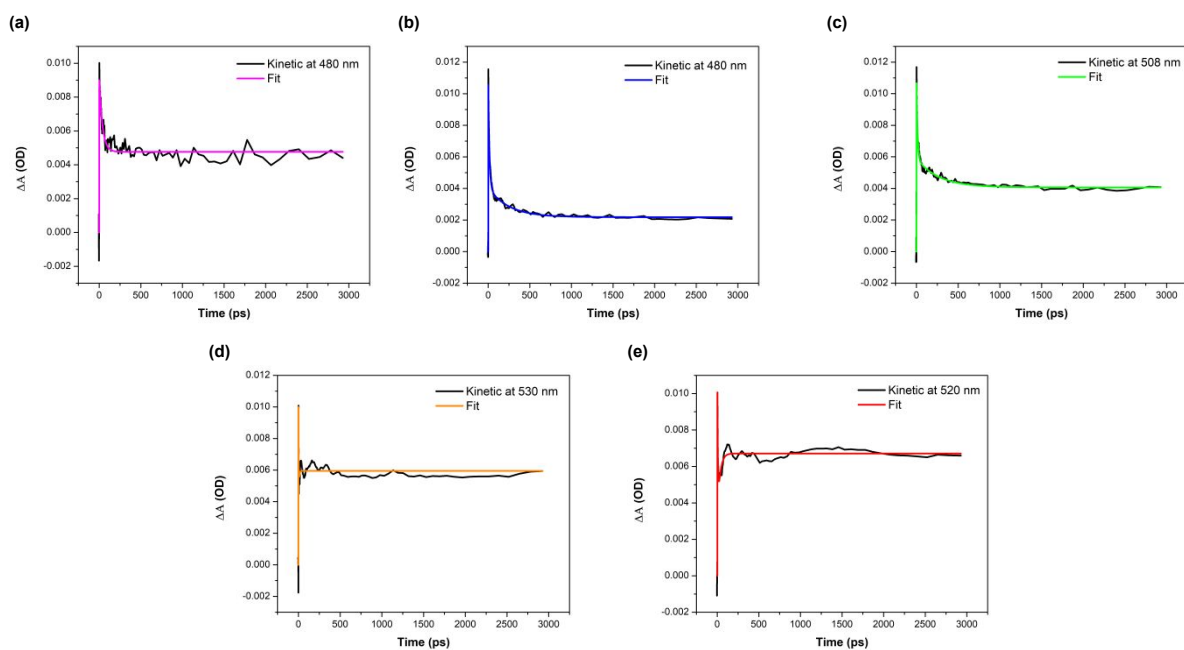

**Figure S15** Kinetic profiles at selected wavelengths of fs-TA spectra of (a) **BN-[5]H**, (b) **BN-[6]H**, (c) **BN-[7]H**, and (d) **E[6]H**. Although the decay times were not obtained by multiexponential decay fitting, owing to the time limit of up to 3 ns, the decay times are longer than their corresponding decay times at 700 nm.

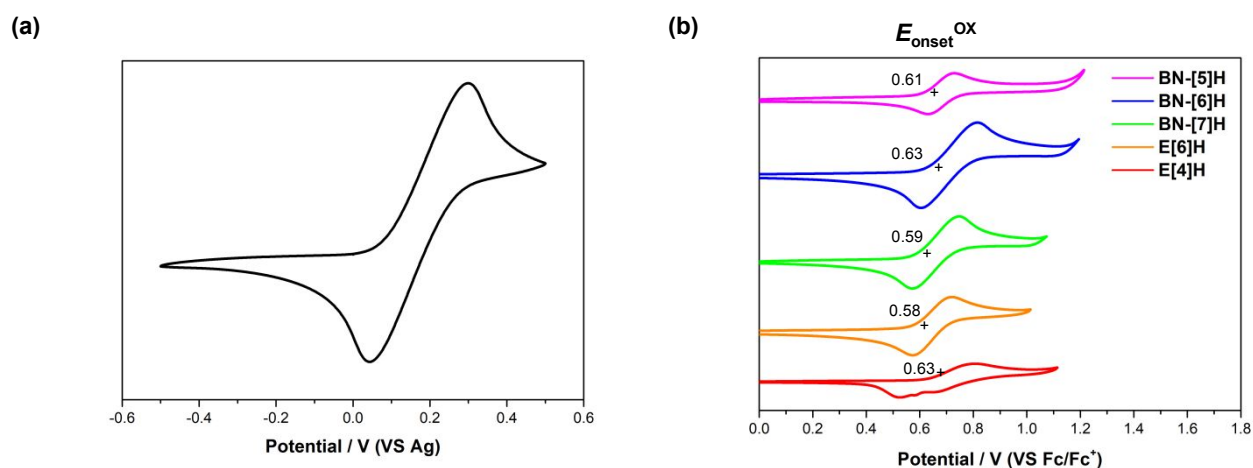

**Figure S16** Cyclic voltammetry curves of decamethylferrocene (a) and NBN-doped helicenes in degassed dichloromethane solution containing  $\text{Bu}_4\text{NPF}_6$  (0.1 M) in a three-electrode cell with a scan rate of 100 mV/s at room temperature.

## 5. Chiral resolution and chiroptical properties

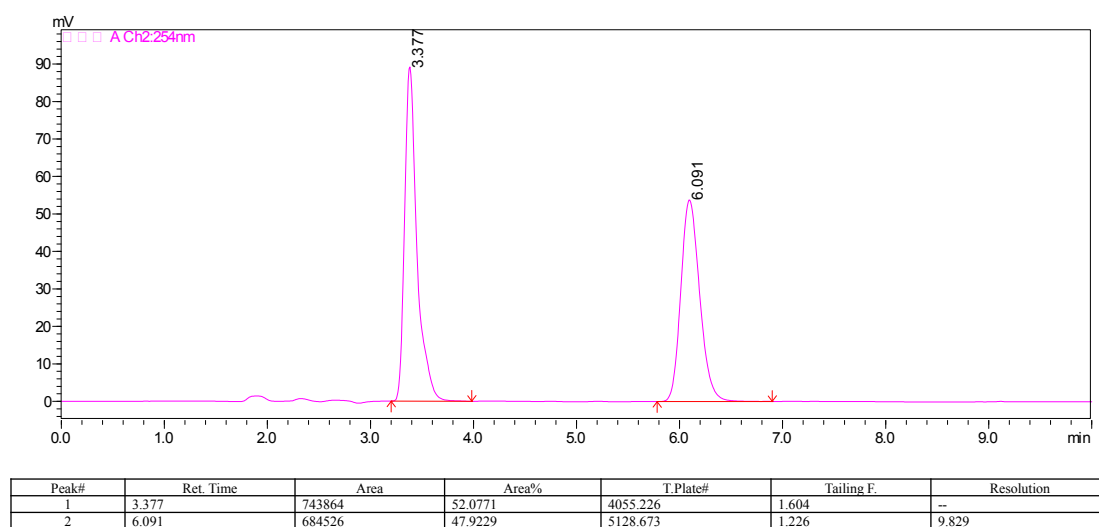

**Figure S17** Resolution of **BN-[6]H** by chiral HPLC monitored at 254 nm was performed with a CHIRALPAK IBN column (0.10 cm I.D.×25 cm L). Injection volume was 1  $\mu\text{L}$ , and a mixture of *n*-hexane/EtOH = 80/20 (V/V) was used as the eluent with a flow rate of 1.0 mL/min at 25 °C. Comparing the experimental and simulated ECD spectra, the first peak with retention time of 3.377 min is (*M*)-**BN-[6]H**, and the second peak with retention time of 6.091 min is (*P*)-**BN-[6]H**.

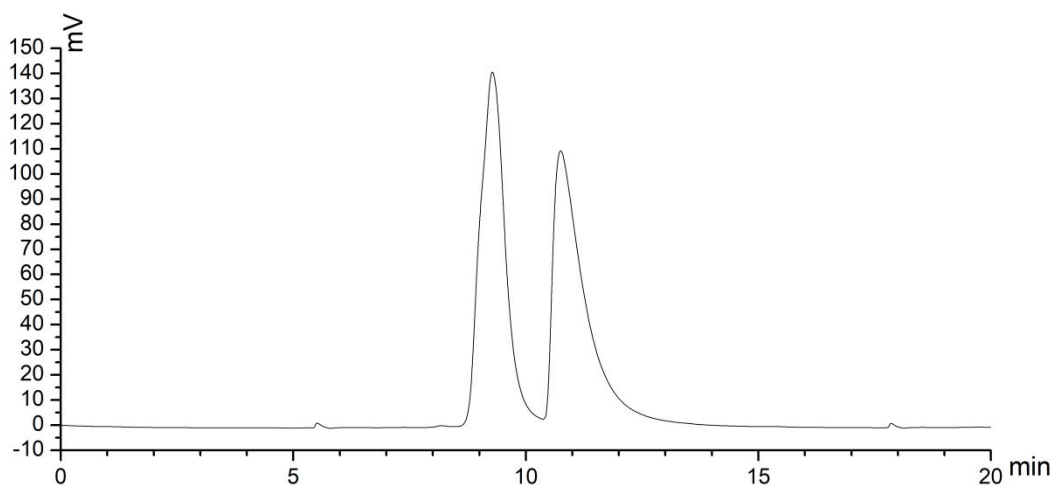

| Peak# | Ret. Time | Area    | Area%   | Height | T.Plate# | Tailing |
|-------|-----------|---------|---------|--------|----------|---------|
| 1     | 9.278     | 5370076 | 50.5980 | 141445 | 1487     | 1.272   |
| 2     | 10.748    | 5500077 | 49.4020 | 110104 | 1372     | 3.220   |

**Figure S18** Resolution of **BN-[7]H** by chiral HPLC monitored at 254 nm was performed with a CHIRALPAK IC column (1.0 cm I.D.×15 cm L). Injection volume was 40  $\mu$ L, and a mixture of *n*-hexane/CH<sub>2</sub>Cl<sub>2</sub> = 75/25 (V/V) was used as the eluent with a flow rate of 3.0 mL/min at 25 °C. Comparing the experimental and simulated ECD spectra, the first peak with retention time of 9.278 min is (*P*)-**BN-[7]H**, and the second peak with retention time of 10.748 min is (*M*)-**BN-[7]H**.

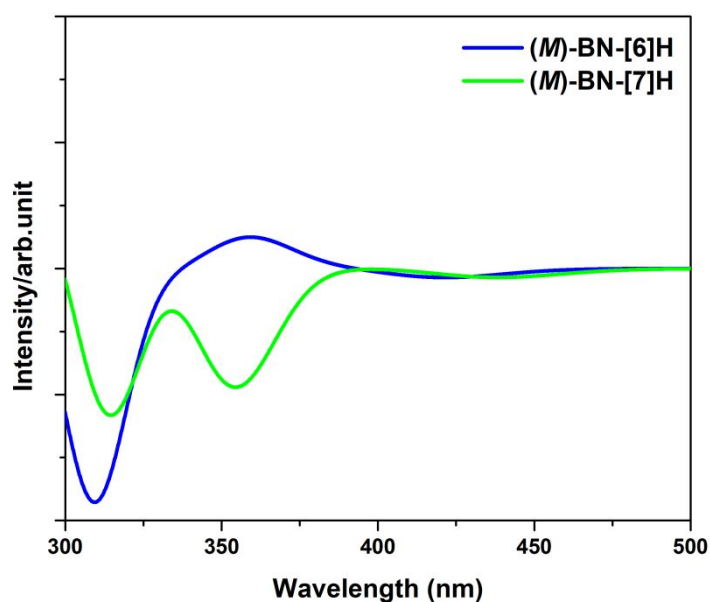

**Figure S19** Calculated ECD spectra for model (*M*)-**BN-[6]H** and (*M*)-**BN-[7]H** at the PBE0/6-311G(d) level.



## CPL spectra

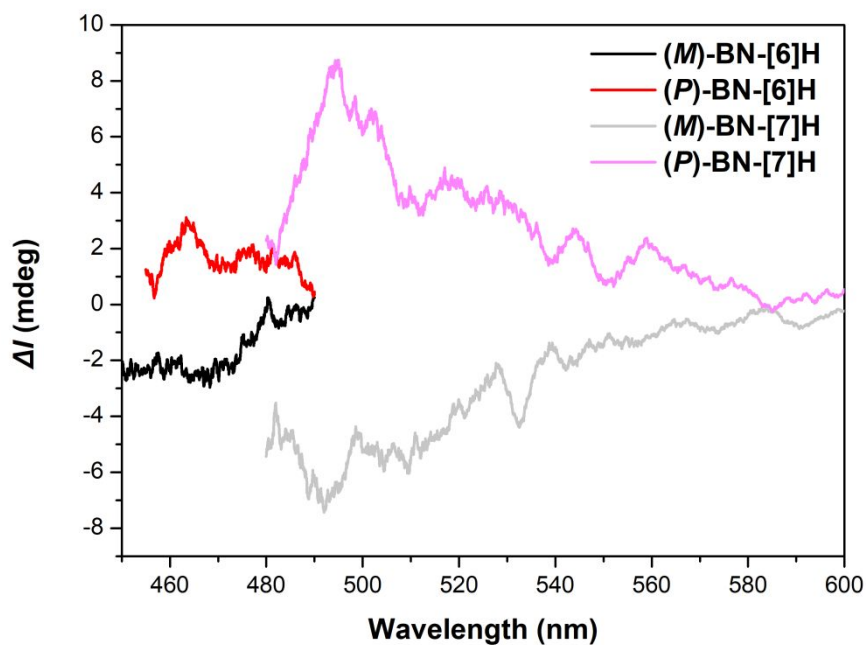

Figure S20 CPL spectra of BN-[6]H and BN-[7]H in toluene ( $1 \times 10^{-5}$  M).

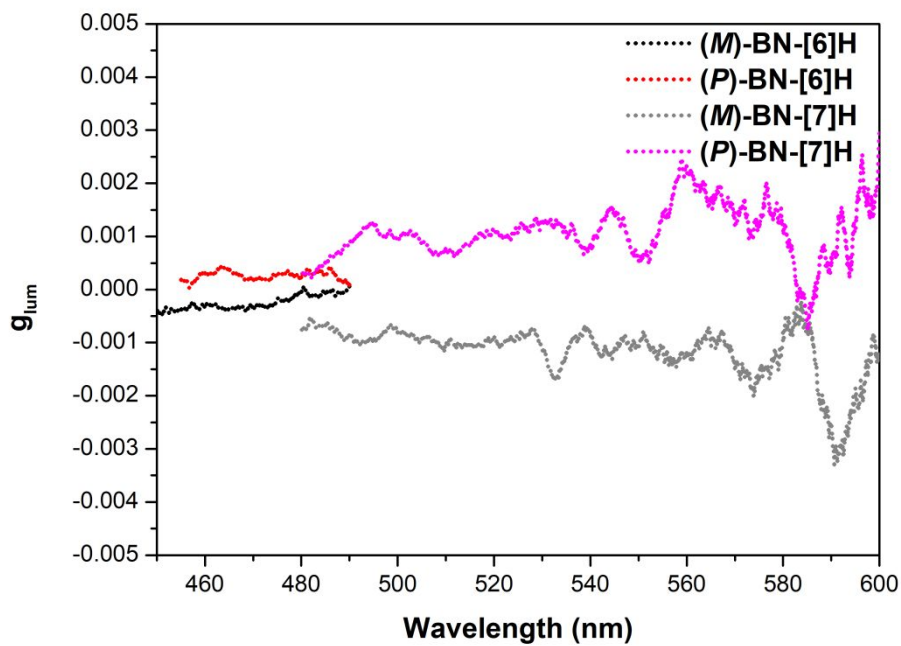

Figure S21 Luminescence dissymmetry factors of BN-[6]H and BN-[7]H in toluene ( $1 \times 10^{-5}$  M),  $g_{lum(\text{BN-[6]H})} = 0.4 \times 10^{-3}$  and  $g_{lum(\text{BN-[7]H})} = 1.0 \times 10^{-3}$ .



**Table S6.** The  $|g_{\text{abs}}|_{\text{max}}$  values of single-stranded helical molecules.

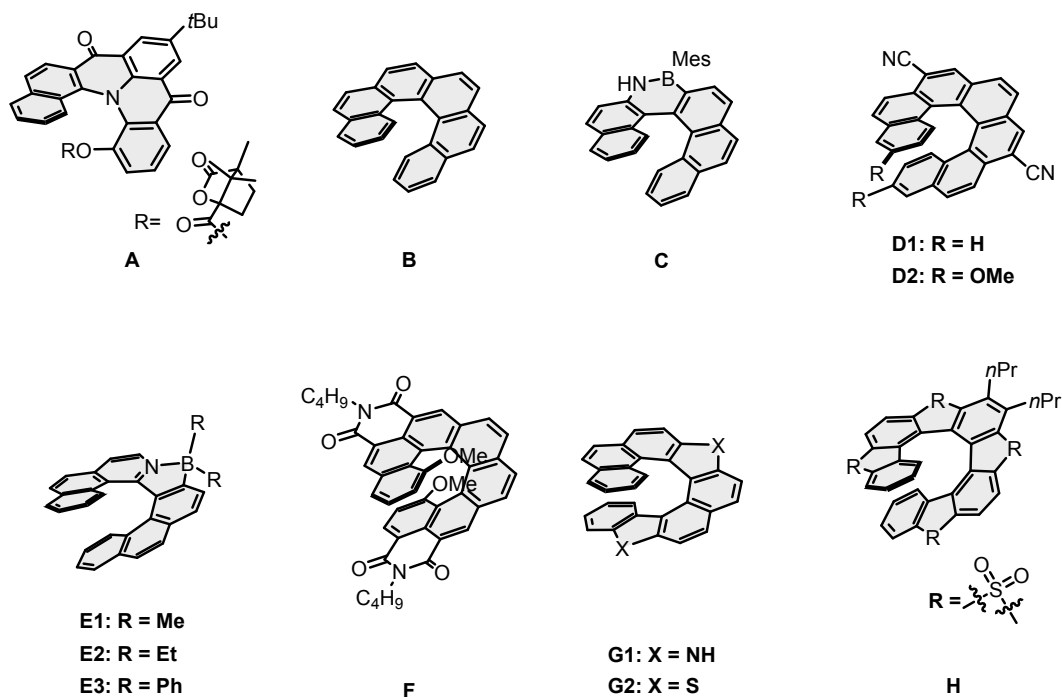

| Compound       | $ g_{\text{abs}} _{\text{max}}$ | $\lambda/\text{nm}$ | Solvent                         | Reference        | Year        |
|----------------|---------------------------------|---------------------|---------------------------------|------------------|-------------|
| <b>A</b>       | 0.001                           | 442                 | CHCl <sub>3</sub>               | S4               | 2003        |
| <b>B</b>       | 0.009                           | 324                 | CH <sub>2</sub> Cl <sub>2</sub> | S5               | 2018        |
| <b>C</b>       | 0.005                           | 308                 | CH <sub>2</sub> Cl <sub>2</sub> | S6               | 2022        |
| <b>D1</b>      | 0.016                           | 421                 | CHCl <sub>3</sub>               | S7               | 2021        |
| <b>D2</b>      | 0.016                           | 418                 | CHCl <sub>3</sub>               | S7               | 2021        |
| <b>E1</b>      | 0.0112                          | 323                 | CH <sub>2</sub> Cl <sub>2</sub> | S8               | 2021        |
| <b>E2</b>      | 0.0091                          | 324                 | CH <sub>2</sub> Cl <sub>2</sub> | S8               | 2021        |
| <b>E3</b>      | 0.0076                          | 325                 | CH <sub>2</sub> Cl <sub>2</sub> | S8               | 2021        |
| <b>F</b>       | 0.011                           | 410                 | CH <sub>2</sub> Cl <sub>2</sub> | S9               | 2020        |
| <b>G1</b>      | 0.019                           | 403                 | CH <sub>2</sub> Cl <sub>2</sub> | S10              | 2021        |
| <b>G2</b>      | 0.017                           | 404                 | CH <sub>2</sub> Cl <sub>2</sub> | S10              | 2021        |
| <b>H</b>       | 0.005                           | 300                 | THF                             | S11              | 2016        |
| <b>BN-[6]H</b> | <b>0.021</b>                    | <b>344</b>          | <b>Toluene</b>                  | <b>This work</b> | <b>2023</b> |
| <b>BN-[7]H</b> | <b>0.018</b>                    | <b>358</b>          | <b>Toluene</b>                  | <b>This work</b> | <b>2023</b> |

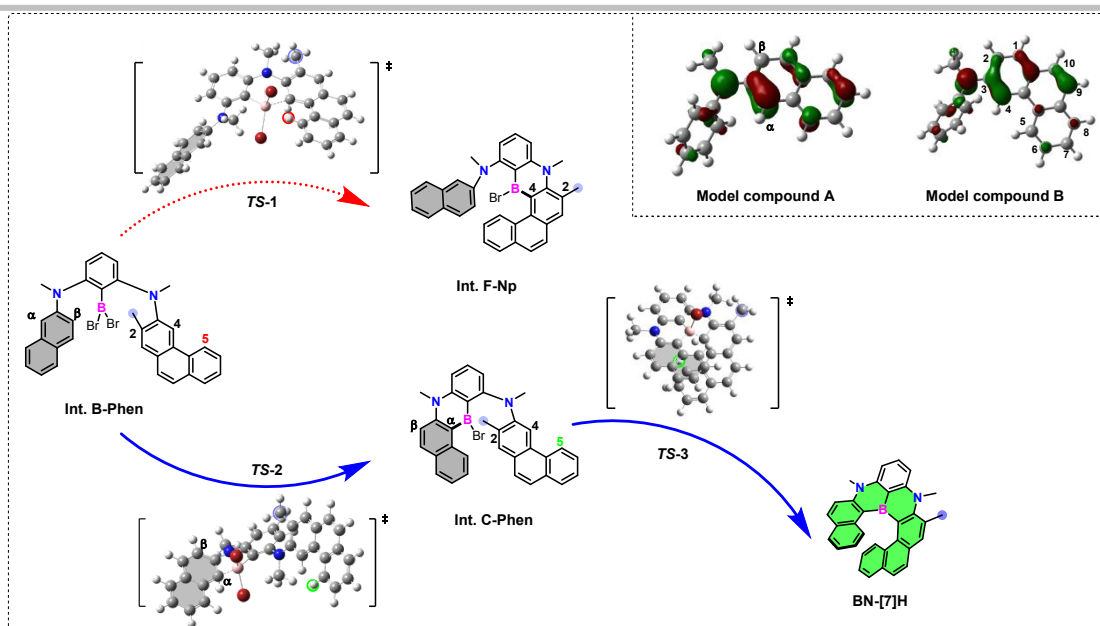

Figure S22 Simplified transition states (TS) analysis of C-H borylation steps in the case of BN-[7]H.

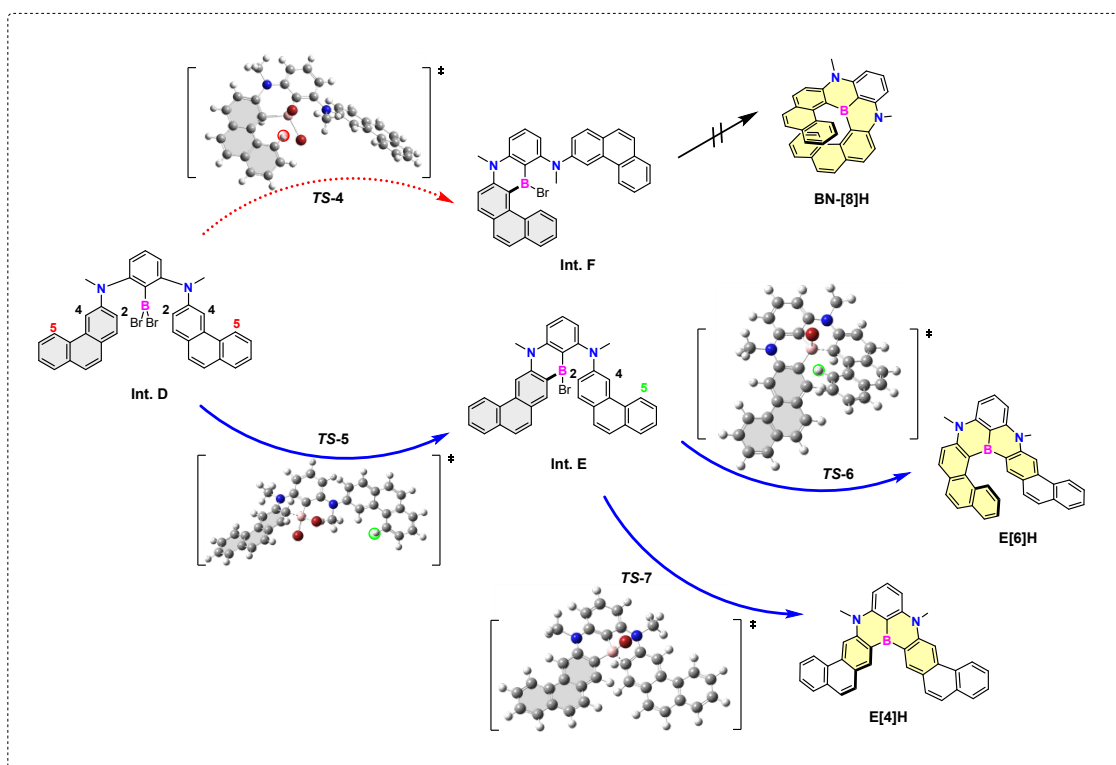

Figure S23 Simplified transition states (TS) analysis of C-H borylation steps in the case of BN-[8]H.

## 6. Theoretical calculations

The density functional theory (DFT) calculations were performed with the Gaussian 16 quantum chemistry package<sup>[S12]</sup> employing the PBE0<sup>[S13]</sup> or B3LYP<sup>[S14]</sup> hybrid functional. The *tert*-butyl groups and the additional methyl group of C ring in **BN-[7]H** were reduced to hydrogen atoms for simplicity. Structures were optimized with the 6-311G(d)<sup>[S15]</sup> or Def2-TZVP<sup>[S16]</sup> basic set. The time-dependent density functional theory (TD-DFT) calculation<sup>[S17]</sup> was conducted after the geometry optimization and considered the solvent used during experiments (toluene) through the self-consistent reaction field (SCRf) method using the polarizable continuum model (PCM)<sup>[S18]</sup> with Grimme's D3BJ dispersion correction<sup>[S19]</sup>. The optimized structures and transition states (TS) were confirmed by harmonic frequency calculations. Nucleus independent chemical shifts (NICS) values were calculated using the standard gauge invariant atomic orbital (GIAO)<sup>[S20]</sup> method using B3LYP functional with the 6-311+G(d,p) basic set. The independent gradient model analysis based on Hirshfeld partition (IGMH) isosurfaces and calculated UV-Vis, ECD spectra were generated using Multiwfn software.<sup>[S21]</sup>

**Table S7.** Calculated photophysical properties data of **BN-[5]H**, **BN-[6]H**, **BN-[7]H**, **E[6]H**, and **E[4]H** at the PBE0/6-311G(d) level.

| compd          | Excited States | Wavelength [nm] | Oscillator Strength                                                             | Transitions                                                                     |
|----------------|----------------|-----------------|---------------------------------------------------------------------------------|---------------------------------------------------------------------------------|
| <b>BN-[5]H</b> | S <sub>1</sub> | 409             | 0.246                                                                           | H -> L 97.2%                                                                    |
|                | S <sub>2</sub> | 341             | 0.057                                                                           | H -> L+1 93.3%                                                                  |
|                | S <sub>3</sub> | 323             | 0.012                                                                           | H-1 -> L 91.4%                                                                  |
|                | S <sub>4</sub> | 312             | 0.186                                                                           | H-2 -> L 85.6%                                                                  |
|                |                |                 |                                                                                 | H -> L+2 6.3%                                                                   |
|                | S <sub>5</sub> | 293             | 0.010                                                                           | H -> L+3 77.4%<br>H-3 -> L 8.7%                                                 |
|                | S <sub>6</sub> | 284             | 0.061                                                                           | H-1 -> L+1 58.6%, H -> L+2 18.6%, H -> L+3 6.6%, H-2 -> L+1 5.4%                |
|                | S <sub>7</sub> | 280             | 0.440                                                                           | H -> L+2 56.7%, H-1 -> L+1 23.7%, H-2 -> L 6.9%                                 |
|                | S <sub>8</sub> | 273             | 0.090                                                                           | H-3 -> L 37.4%, H-2 -> L+1 28.6%, H -> L+3 7.8%, H-1 -> L+1 7.3%, H -> L+4 6.8% |
| S <sub>9</sub> | 265            | 0.288           | H-3 -> L 37.3%, H-2 -> L+1 31.2%, H-1 -> L+3 7.8%, H -> L+2 7.3%, H-4 -> L 7.0% |                                                                                 |
| <b>BN-[6]H</b> | S <sub>1</sub> | 422             | 0.225                                                                           | H -> L 97.7%                                                                    |

|                |                |     |       |                                                                                         |
|----------------|----------------|-----|-------|-----------------------------------------------------------------------------------------|
|                | S <sub>2</sub> | 359 | 0.047 | H -> L+1 96.3%                                                                          |
|                | S <sub>3</sub> | 330 | 0.012 | H-1 -> L 92.0%                                                                          |
|                | S <sub>4</sub> | 323 | 0.008 | H -> L+2 76.5%<br>H-3 -> L 19.2%                                                        |
|                | S <sub>5</sub> | 321 | 0.154 | H-2 -> L 81.2%<br>H -> L+3 10.3%                                                        |
|                | S <sub>6</sub> | 311 | 0.154 | H-3 -> L 77.3%<br>H -> L+2 20.1%                                                        |
|                | S <sub>7</sub> | 302 | 0.011 | H-1 -> L+1 70.0%<br>H-2 -> L+1 21.1%                                                    |
|                | S <sub>8</sub> | 287 | 0.373 | H -> L+3 72.1%, H-2 -> L<br>11.0%, H-3 -> L+1 10.2%                                     |
|                | S <sub>9</sub> | 287 | 0.129 | H-2 -> L+1 62.9%<br>H-1 -> L+1 25.4%                                                    |
| <b>BN-[7]H</b> | S <sub>1</sub> | 438 | 0.168 | H -> L 97.1%                                                                            |
|                | S <sub>2</sub> | 366 | 0.067 | H -> L+1 90.1%                                                                          |
|                | S <sub>3</sub> | 362 | 0.006 | H-1 -> L 73.8%<br>H -> L+2 14.8%                                                        |
|                | S <sub>4</sub> | 355 | 0.071 | H -> L+2 79.3%<br>H-1 -> L 15.0%                                                        |
|                | S <sub>5</sub> | 326 | 0.098 | H-2 -> L 83.9%<br>H -> L+3 8.1%                                                         |
|                | S <sub>6</sub> | 325 | 0.022 | H-3 -> L 42.6%<br>H-1 -> L+1 42.5%                                                      |
|                | S <sub>7</sub> | 317 | 0.085 | H-1 -> L+1 45.7%<br>H-3 -> L 39.9%                                                      |
|                | S <sub>8</sub> | 305 | 0.078 | H -> L+3 55.8%, H-1 -> L+2<br>29.1%, H-3 -> L 7.0%                                      |
|                | S <sub>9</sub> | 299 | 0.424 | H-1 -> L+2 48.2%, H -> L+3<br>19.7%, H-2 -> L 8.5%, H-2 -><br>L+1 7.2%, H-3 -> L+1 6.0% |
| <b>E[6]H</b>   | S <sub>1</sub> | 447 | 0.272 | H -> L 97.1%                                                                            |
|                | S <sub>2</sub> | 379 | 0.020 | H-1 -> L 93.2%                                                                          |
|                | S <sub>3</sub> | 358 | 0.043 | H -> L+1 87.3%                                                                          |
|                | S <sub>4</sub> | 348 | 0.007 | H -> L+2 71.5%, H-2 -> L<br>19.7%                                                       |
|                | S <sub>5</sub> | 340 | 0.113 | H-2 -> L 73.7%, H -> L+2<br>16.4%                                                       |
|                | S <sub>6</sub> | 336 | 0.150 | H -> L+3 71.5%, H-3 -> L<br>20.0%                                                       |

|              |                |     |       |                                                                                                 |
|--------------|----------------|-----|-------|-------------------------------------------------------------------------------------------------|
| <b>E[4]H</b> | S <sub>7</sub> | 326 | 0.107 | H-1 -> L+1 32.4%, H-3 -> L 26.2%, H-4 -> L 10.1%, H -> L+3 7.7%, H -> L+1 5.7%, H-2 -> L+1 5.5% |
|              | S <sub>8</sub> | 318 | 0.286 | H-3 -> L 27.8%, H-1 -> L+2 22.8%, H-4 -> L 16.2%, H -> L+3 11.7%                                |
|              | S <sub>9</sub> | 313 | 0.114 | H-4 -> L 42.4%, H-1 -> L+1 41.1%, H-3 -> L 9.7%                                                 |
|              | S <sub>1</sub> | 459 | 0.402 | H -> L 97.9%                                                                                    |
|              | S <sub>2</sub> | 397 | 0.028 | H-1 -> L 95.2%                                                                                  |
|              | S <sub>3</sub> | 345 | 0.116 | H -> L+1 73.9%, H-2 -> L 10.0%, H-1 -> L+2 8.9%                                                 |
|              | S <sub>4</sub> | 344 | 0.042 | H -> L+3 36.1%, H -> L+2 32.8%, H-3 -> L 15.0%, H-1 -> L+1 10.7%                                |
|              | S <sub>5</sub> | 335 | 0.121 | H -> L+3 53.1%, H -> L+2 36.1%, H-3 -> L 5.5%                                                   |
|              | S <sub>6</sub> | 331 | 0.420 | H-2 -> L 81.0%                                                                                  |
|              | S <sub>7</sub> | 321 | 0.261 | H-4 -> L 53.7%, H -> L+1 13.3%, H-1 -> L+3 12.5%, H-1 -> L+2 6.1%, H-2 -> L 5.7%                |
|              | S <sub>8</sub> | 317 | 0.325 | H-3 -> L 58.3%, H -> L+2 26.8%, H-1 -> L+1 5.3%                                                 |
|              | S <sub>9</sub> | 307 | 0.274 | H-1 -> L+3 61.5%, H-4 -> L 27.3%                                                                |

**Table S8.** Coordinates of electric transition dipole moments ( $\mu$ ) and magnetic transition dipole moments ( $m$ ) of model (M)-BN-[6]H and (M)-BN-[7]H at the PBE0/6-311G(d) level.

| compd       | Excited States                 | $\mu$ [a.u.] |        |        | $m$ [a.u.] |        |        |
|-------------|--------------------------------|--------------|--------|--------|------------|--------|--------|
|             |                                | x            | y      | z      | x          | y      | z      |
| (M)-BN-[6]H | S <sub>0</sub> →S <sub>1</sub> | 0            | -1.760 | -0.136 | 0          | -0.078 | 0.325  |
|             | S <sub>0</sub> →S <sub>2</sub> | -0.746       | 0      | 0      | 0.476      | 0      | 0      |
|             | S <sub>0</sub> →S <sub>3</sub> | 0.369        | 0      | 0      | 0.072      | 0      | 0      |
|             | S <sub>0</sub> →S <sub>4</sub> | -0.001       | -0.269 | 0.127  | 0          | -0.602 | 1.864  |
|             | S <sub>0</sub> →S <sub>5</sub> | 1.275        | -0.001 | 0      | -0.548     | 0      | 0.001  |
|             | S <sub>0</sub> →S <sub>6</sub> | 0.001        | 1.014  | -0.744 | 0          | 0.439  | -2.652 |
| (M)-BN-[7]H | S <sub>0</sub> →S <sub>1</sub> | -0.095       | -1.551 | -0.101 | 0.028      | -0.010 | -0.882 |
|             | S <sub>0</sub> →S <sub>2</sub> | 0.822        | 0.352  | 0.043  | -0.383     | 0.232  | 0.528  |
|             | S <sub>0</sub> →S <sub>3</sub> | 0.095        | 0.065  | 0.252  | -0.299     | 0.206  | 0.290  |
|             | S <sub>0</sub> →S <sub>4</sub> | 0.667        | -0.193 | 0.585  | -0.039     | 0.596  | 2.548  |

**Table S9.** Calculated transition dipole moments ( $\mu$ ,  $m$ , and  $\theta$ ) and  $g_{\text{abs}}$  values of model (M)-BN-[6]H and (M)-BN-[7]H.

| compd       | Excited States                 | $ \mu $<br>[10 <sup>-20</sup> esu cm] | $ m $<br>[10 <sup>-20</sup> erg G <sup>-1</sup> ] | $\theta$<br>[°] | $\cos\theta$ | $g_{\text{abs}}^{\text{cal}}$ |
|-------------|--------------------------------|---------------------------------------|---------------------------------------------------|-----------------|--------------|-------------------------------|
| (M)-BN-[6]H | S <sub>0</sub> →S <sub>1</sub> | 448.8                                 | 0.310                                             | 81              | 0.156        | 0.0004                        |
|             | S <sub>0</sub> →S <sub>2</sub> | 189.6                                 | 0.441                                             | 180             | -1.000       | -0.009                        |
|             | S <sub>0</sub> →S <sub>3</sub> | 93.7                                  | 0.067                                             | 0               | 1.000        | 0.003                         |
|             | S <sub>0</sub> →S <sub>4</sub> | 75.5                                  | 1.816                                             | 47              | 0.682        | 0.066                         |
|             | S <sub>0</sub> →S <sub>5</sub> | 324.1                                 | 0.509                                             | 180             | -1.000       | -0.006                        |
|             | S <sub>0</sub> →S <sub>6</sub> | 319.6                                 | 2.493                                             | 44              | 0.719        | 0.022                         |
| (M)-BN-[7]H | S <sub>0</sub> →S <sub>1</sub> | 395.8                                 | 0.818                                             | 86              | 0.069        | 0.0006                        |
|             | S <sub>0</sub> →S <sub>2</sub> | 227.5                                 | 0.642                                             | 110             | -0.342       | -0.004                        |
|             | S <sub>0</sub> →S <sub>3</sub> | 70.4                                  | 0.431                                             | 63              | 0.454        | 0.011                         |
|             | S <sub>0</sub> →S <sub>4</sub> | 230.7                                 | 2.427                                             | 55              | 0.574        | 0.024                         |

**Table S10.** The nonplanarity values (NP) and NICS(1)<sub>zz</sub> values.

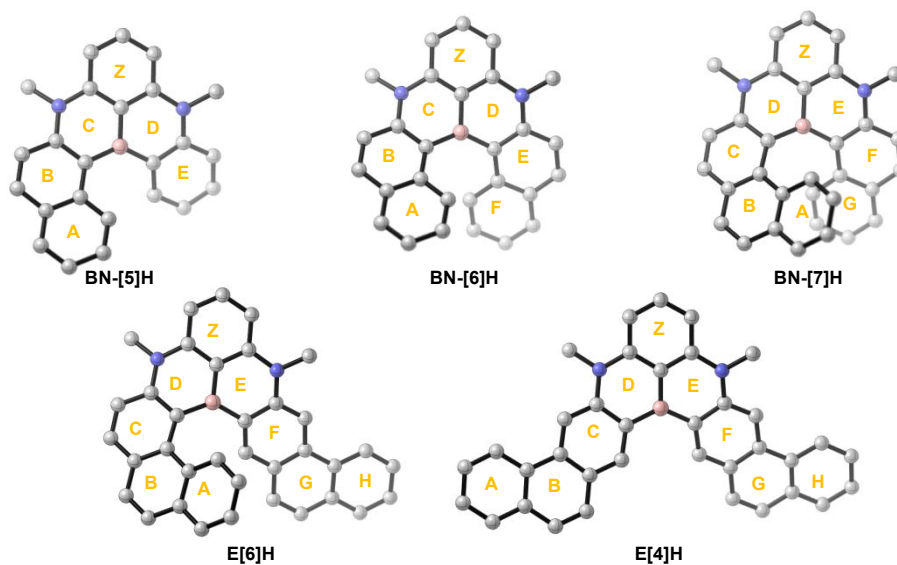

| Rings | BN-[5]H           |                                      | BN-[6]H           |                                      | BN-[7]H           |                                      | E[6]H             |                                      | E[4]H             |                                      |
|-------|-------------------|--------------------------------------|-------------------|--------------------------------------|-------------------|--------------------------------------|-------------------|--------------------------------------|-------------------|--------------------------------------|
|       | NP <sup>[a]</sup> | NICS(1) <sub>zz</sub> <sup>[b]</sup> |
| Z     | 0.015             | -23.7                                | 0.015             | -24.2                                | 0.012             | -23.1                                | 0.019             | -22.6                                | 0.012             | -22.7                                |
| A     | 0.014             | -28.2                                | 0.011             | -28.8                                | 0.028             | -31.8                                | 0.028             | -31.5                                | 0.004             | -27.4                                |
| B     | 0.031             | -23.3                                | 0.020             | -23.0                                | 0.037             | -22.5                                | 0.028             | -21.6                                | 0.006             | -17.2                                |
| C     | <b>0.075</b>      | <b>-3.9</b>                          | <b>0.118</b>      | <b>-4.0</b>                          | 0.062             | -20.4                                | 0.044             | -22.8                                | 0.005             | -26.9                                |
| D     | <b>0.094</b>      | <b>-2.6</b>                          | <b>0.118</b>      | <b>-4.0</b>                          | <b>0.080</b>      | <b>-1.7</b>                          | <b>0.084</b>      | <b>-2.9</b>                          | <b>0.082</b>      | <b>-1.3</b>                          |
| E     | 0.024             | -23.7                                | 0.020             | -23.0                                | <b>0.107</b>      | <b>-2.8</b>                          | <b>0.072</b>      | <b>0.3</b>                           | <b>0.082</b>      | <b>-1.3</b>                          |
| F     | -                 | -                                    | 0.011             | -28.8                                | 0.025             | -23.0                                | 0.018             | -25.6                                | 0.005             | -26.9                                |
| G     | -                 | -                                    | -                 | -                                    | 0.022             | -28.9                                | 0.010             | -17.7                                | 0.006             | -17.2                                |
| H     | -                 | -                                    | -                 | -                                    | -                 | -                                    | 0.006             | -27.5                                | 0.004             | -27.4                                |

<sup>[a]</sup> Based on X-ray single crystal structures. The average distance of the carbon atoms in a ring from a generated best-fit plane was used to evaluate the nonplanarity of a ring. <sup>[b]</sup> Calculated at the GIAO-B3LYP/6-311+G(d,p) level.

**Table S11.** The cartesian coordinates (Å) of some optimized structures are listed as follows:Ground state of model (*P*)-BN-[5]H

|   |             |             |             |                                            |             |             |             |
|---|-------------|-------------|-------------|--------------------------------------------|-------------|-------------|-------------|
| N | 2.99192700  | -0.71196700 | -0.53395200 | C                                          | 3.60042300  | 1.65051700  | -0.65160700 |
| N | -0.32894500 | 2.67158100  | 0.49078100  | H                                          | 4.63307700  | 1.42035200  | -0.88343800 |
| C | -2.36896800 | -0.38697400 | -0.26946400 | C                                          | -4.68559200 | -1.92789000 | -0.90933900 |
| C | 0.18033000  | -2.51698600 | 1.10418900  | H                                          | -5.56045600 | -2.52741900 | -1.14726700 |
| C | -1.20274100 | 0.40939000  | 0.05733800  | C                                          | 3.21749000  | 2.98561700  | -0.52567400 |
| C | -1.40221400 | 1.78270700  | 0.33639500  | C                                          | -2.72901600 | 2.30949800  | 0.45613600  |
| C | 1.31190600  | 0.98621800  | -0.07930400 | H                                          | -2.88963400 | 3.35875000  | 0.66937000  |
| C | 0.85969600  | -1.49120100 | 0.41031300  | C                                          | 1.92512900  | 3.35864400  | -0.16289500 |
| C | 2.64793100  | 0.63902500  | -0.42510100 | H                                          | 1.67453100  | 4.41125200  | -0.10759600 |
| C | 2.22643600  | -1.72057400 | 0.07481100  | C                                          | -0.56378400 | 3.99667200  | 1.06425100  |
| C | 0.77590600  | -3.73126400 | 1.42167300  | H                                          | 0.35825500  | 4.35291100  | 1.52455600  |
| C | -3.38769300 | -2.45087900 | -1.11140400 | H                                          | -1.31603300 | 3.93082300  | 1.85222000  |
| H | -3.26723000 | -3.44983800 | -1.52385500 | H                                          | -0.89320300 | 4.73127700  | 0.31631000  |
| C | -3.68831900 | 0.15234000  | -0.13195900 | B                                          | 0.26088100  | -0.09202200 | 0.11446200  |
| C | 0.96850600  | 2.35337000  | 0.07592500  | H                                          | 3.95616900  | 3.76234800  | -0.70949500 |
| C | 4.25381000  | -1.06472100 | -1.17672300 | H                                          | -0.84882600 | -2.34103800 | 1.40357200  |
| H | 4.45221900  | -0.36348200 | -1.98948900 | H                                          | 0.22152600  | -4.49502300 | 1.96056100  |
| H | 4.17253600  | -2.06104000 | -1.61436300 |                                            |             |             |             |
| H | 5.10546000  | -1.05006100 | -0.48111100 |                                            |             |             |             |
|   |             |             |             | Ground state of model ( <i>P</i> )-BN-[6]H |             |             |             |
| C | 2.10511200  | -3.95345400 | 1.03857400  | N                                          | 2.03742100  | 2.25969300  | 0.85955400  |
| H | 2.59469400  | -4.89443400 | 1.27858400  | N                                          | 2.03983200  | -2.25768700 | -0.85960600 |
| C | -3.82370100 | 1.51120500  | 0.26020100  | C                                          | -1.36513900 | -1.78206000 | 0.63273400  |
| H | -4.82156500 | 1.93459100  | 0.35566900  | C                                          | -1.36704400 | 1.78067800  | -0.63284600 |
| C | -4.82596500 | -0.64062000 | -0.43562300 | C                                          | -0.08725700 | -1.42556200 | 0.05366600  |
| H | -5.81449500 | -0.20403400 | -0.30614400 | C                                          | 0.71541100  | -2.47368400 | -0.45303000 |
| C | -2.26771000 | -1.70287300 | -0.80340300 | C                                          | 2.04629600  | 0.00102600  | -0.00007900 |
| H | -1.28668800 | -2.12013900 | -0.99394500 | C                                          | -0.08876100 | 1.42542000  | -0.05388300 |
| C | 2.82561300  | -2.96494100 | 0.37861300  | C                                          | -2.15840100 | 0.84352200  | -1.35172100 |
| H | 3.86887600  | -3.14994700 | 0.15020300  | H                                          | -1.78780000 | -0.16588400 | -1.47986900 |



|   |             |             |             |                                            |             |             |             |
|---|-------------|-------------|-------------|--------------------------------------------|-------------|-------------|-------------|
| C | 2.76338300  | 1.14541700  | 0.42937000  | H                                          | 4.74080200  | -2.01725100 | -0.70696400 |
| C | 0.71281400  | 2.47431900  | 0.45292100  | C                                          | -3.87351400 | 2.50867000  | -1.77498000 |
| C | -1.86750600 | 3.11869800  | -0.54486900 | H                                          | -4.83350200 | 2.77258300  | -2.21042700 |
| C | -3.37117000 | -1.19802900 | 1.90476500  | C                                          | -3.37250100 | 1.19480300  | -1.90494200 |
| H | -3.94668200 | -0.45495000 | 2.45074700  | H                                          | -3.94724700 | 0.45122900  | -2.45105800 |
| C | -1.86421400 | -3.12060700 | 0.54499700  | C                                          | 2.72471800  | -3.25891700 | -1.67251600 |
| C | 2.76459500  | -1.14264500 | -0.42940400 | H                                          | 3.49877400  | -2.76585500 | -2.26221700 |
| C | 2.72109200  | 3.26165600  | 1.67258300  | H                                          | 2.01856100  | -3.71298900 | -2.36959000 |
| H | 3.49541600  | 2.76941700  | 2.26261600  | H                                          | 3.19152600  | -4.05287800 | -1.07304300 |
| H | 2.01424000  | 3.71513400  | 2.36934700  | B                                          | 0.52600800  | 0.00024400  | -0.00020500 |
| H | 3.18732900  | 4.05600200  | 1.07317700  | H                                          | 5.92986000  | 0.00300400  | 0.00008700  |
| C | -1.05784200 | 4.10226900  | 0.08170500  |                                            |             |             |             |
| H | -1.42890400 | 5.12256500  | 0.15026800  | Ground state of model ( <i>P</i> )-BN-[7]H |             |             |             |
| C | -1.05354200 | -4.10343200 | -0.08144200 | N                                          | -0.18752646 | 2.02388502  | -0.03141374 |
| H | -1.42353500 | -5.12413000 | -0.14980500 | N                                          | -0.06336446 | 6.75134702  | 1.02000026  |
| C | -3.12129900 | -3.45621000 | 1.10876800  | C                                          | -3.67326246 | 6.08180902  | 0.29862226  |
| H | -3.47461300 | -4.48127100 | 1.01809200  | C                                          | -2.29573846 | 5.77233002  | 0.59936326  |
| C | -2.15745500 | -0.84558600 | 1.35143900  | C                                          | -4.25749846 | 7.27621002  | 0.80005926  |
| H | -1.78790900 | 0.16424100  | 1.47935300  | C                                          | -4.50791046 | 5.23436902  | -0.54367374 |
| C | 0.19487000  | 3.80462600  | 0.54241400  | C                                          | -5.66232246 | 7.51868202  | 0.67141526  |
| H | 0.80621600  | 4.60627300  | 0.93756600  | H                                          | -6.07146546 | 8.42199802  | 1.11842626  |
| C | 4.16917400  | 1.14395900  | 0.42748500  | C                                          | -1.46490946 | 6.84174702  | 1.03004526  |
| H | 4.73869200  | 2.02202600  | 0.70706600  | C                                          | -2.21904946 | 2.96128202  | 0.98609526  |
| C | -3.87080900 | -2.51244700 | 1.77507700  | C                                          | -3.42633846 | 8.20931602  | 1.46472226  |
| H | -4.83050500 | -2.77728100 | 2.21060600  | H                                          | -3.87639246 | 9.09739102  | 1.90238226  |
| C | 4.84265500  | 0.00244800  | 0.00005000  | C                                          | -2.06968646 | 8.03329702  | 1.53433426  |
| C | -3.12496400 | 3.45309000  | -1.10852600 | C                                          | -3.98110946 | 4.20843002  | -1.36521174 |
| H | -3.47934400 | 4.47776500  | -1.01764900 | H                                          | -2.90971246 | 4.05742502  | -1.40078774 |
| C | 0.19883800  | -3.80455600 | -0.54225900 | C                                          | -3.43363146 | 2.67864502  | 1.72123826  |
| H | 0.81099400  | -4.60565600 | -0.93724800 | C                                          | -5.91175946 | 5.49687302  | -0.63910974 |
| C | 4.17037600  | -1.13975800 | -0.42742000 | C                                          | 0.62218854  | 5.57211702  | 0.70745826  |

|   |             |             |             |                                    |             |             |             |
|---|-------------|-------------|-------------|------------------------------------|-------------|-------------|-------------|
| C | -5.30810446 | 3.40013502  | 3.11973426  | C                                  | -5.81730146 | 2.08428202  | 3.17031226  |
| H | -5.82658446 | 4.19896402  | 3.64373126  | H                                  | -6.73108146 | 1.87200502  | 3.71881326  |
| C | -4.15411846 | 3.68538602  | 2.41964826  | C                                  | 1.96194854  | 3.17192602  | 0.05914026  |
| H | -3.77514946 | 4.69846802  | 2.41999026  | H                                  | 2.50744254  | 2.25936502  | -0.14797974 |
| C | -1.46279646 | 1.85872402  | 0.53187526  | C                                  | -5.12989146 | 1.07300002  | 2.53798926  |
| C | 0.42642754  | 0.92889802  | -0.77649174 | H                                  | -5.48485446 | 0.04571702  | 2.58846326  |
| H | -0.33848246 | 0.39600202  | -1.34390074 | B                                  | -1.63416346 | 4.36934602  | 0.67250826  |
| H | 1.13889854  | 1.34290002  | -1.49143174 | H                                  | 3.74974954  | 4.33576702  | 0.23160426  |
| H | 0.95262854  | 0.21089402  | -0.13184974 | H                                  | -1.47791746 | 8.78344402  | 2.04301226  |
| C | -1.97179846 | 0.52765402  | 0.64737926  |                                    |             |             |             |
| H | -1.39039246 | -0.31551998 | 0.29595926  | Transition state <b>TS_BN-[5]H</b> |             |             |             |
| C | -6.46984346 | 6.63812102  | 0.02029326  | C                                  | -0.96825800 | -2.32929800 | -0.34561900 |
| H | -7.54009346 | 6.81360802  | -0.05633374 | C                                  | 1.38333800  | -1.76140100 | -0.08878100 |
| C | 0.56248654  | 3.18194302  | 0.18544426  | C                                  | -1.30813200 | -0.96391400 | -0.13291800 |
| C | 2.02737254  | 5.54468602  | 0.61288326  | C                                  | 1.23433000  | -0.35994900 | -0.22402700 |
| H | 2.63611954  | 6.41678302  | 0.80804326  | C                                  | 2.55531500  | -2.35241600 | 0.48625400  |
| C | -0.12181346 | 4.37878602  | 0.52094026  | C                                  | 3.60389800  | -1.58289100 | 0.88853500  |
| C | -3.93251046 | 1.34064802  | 1.82703426  | C                                  | 3.62768100  | -0.19780800 | 0.58086400  |
| C | -6.18750446 | 3.62594002  | -2.17222274 | C                                  | 2.48528700  | 0.38636100  | -0.06373300 |
| H | -6.82602746 | 2.99786702  | -2.78778174 | H                                  | 2.56393700  | -3.41489500 | 0.69930900  |
| C | -6.72842646 | 4.66065602  | -1.43670374 | H                                  | 4.44988600  | -2.02983200 | 1.40532400  |
| H | -7.79575946 | 4.86589602  | -1.47804074 | C                                  | 4.79553200  | 0.56396000  | 0.83079600  |
| C | -4.79547246 | 3.41724002  | -2.15316474 | C                                  | 2.70590700  | 1.67523100  | -0.60896700 |
| H | -4.35459646 | 2.64101202  | -2.77277574 | C                                  | 3.86821300  | 2.39343100  | -0.40058800 |
| C | 2.66421154  | 4.35029702  | 0.28907026  | C                                  | 4.91414200  | 1.85830700  | 0.37425400  |
| C | 0.73404654  | 7.97065402  | 1.15986726  | H                                  | 5.61728400  | 0.08630800  | 1.36005700  |
| H | 1.20854754  | 8.04396102  | 2.14658126  | H                                  | 1.98288600  | 2.06884400  | -1.29998200 |
| H | 1.51239654  | 7.98713402  | 0.39424026  | H                                  | 3.97977400  | 3.37134800  | -0.86191100 |
| H | 0.11562754  | 8.84837502  | 0.99382626  | H                                  | 5.81686400  | 2.43362800  | 0.55938900  |
| C | -3.17748446 | 0.28883102  | 1.24639926  | C                                  | -2.66988900 | -0.69079800 | 0.18227700  |
| H | -3.54692746 | -0.73106598 | 1.32831926  | C                                  | -2.29026300 | 1.71455400  | 0.17211600  |

|                                    |             |             |             |   |             |             |             |
|------------------------------------|-------------|-------------|-------------|---|-------------|-------------|-------------|
| C                                  | -0.94047500 | 1.59005700  | -0.29948100 | C | 4.23467600  | 1.21181500  | -0.53401900 |
| C                                  | -2.93299400 | 2.97326900  | 0.22196900  | C | 4.89613600  | 0.00000100  | -0.68563900 |
| C                                  | -2.29845600 | 4.12269300  | -0.21641800 | C | 4.23466600  | -1.21184700 | -0.53401900 |
| C                                  | -1.00780200 | 4.03483300  | -0.73528200 | C | 2.84858700  | -1.20850700 | -0.28745600 |
| C                                  | -0.37712900 | 2.79946500  | -0.76758900 | C | 2.09487300  | -0.00000700 | -0.28399700 |
| H                                  | -3.96095600 | 3.04816400  | 0.55247400  | B | 0.55085500  | -0.00000200 | -0.33829700 |
| H                                  | -2.82422300 | 5.07358000  | -0.18190800 | C | -0.07134700 | -1.44735500 | -0.16131200 |
| H                                  | 0.60590400  | 2.78421700  | -1.19759300 | C | 0.82844200  | -2.41989700 | 0.32981600  |
| H                                  | -0.49908800 | 4.91548800  | -1.11715500 | N | 2.19502100  | -2.38570200 | 0.04183300  |
| C                                  | -3.64836900 | -1.69977300 | 0.13853100  | C | 2.95287700  | -3.63522400 | 0.02949500  |
| C                                  | -3.27587000 | -3.00144800 | -0.17328100 | C | 0.38348400  | -3.47037200 | 1.20305600  |
| H                                  | -4.69432400 | -1.47101000 | 0.29981900  | C | -0.94208100 | -3.66905100 | 1.44701000  |
| H                                  | -4.03710600 | -3.77627600 | -0.21944100 | C | -1.91002100 | -2.96339900 | 0.68006400  |
| C                                  | -1.94858900 | -3.33826500 | -0.39999100 | C | -1.45685500 | -1.91527500 | -0.18618600 |
| H                                  | -1.68663900 | -4.37575000 | -0.55948900 | C | -2.37489400 | -1.50131700 | -1.17802100 |
| C                                  | 0.73769300  | -4.01904900 | -0.84353100 | C | -3.68261400 | -1.94968400 | -1.21385100 |
| H                                  | 0.62725800  | -4.74991300 | -0.03060900 | C | -4.15706000 | -2.85016600 | -0.24192600 |
| H                                  | 0.09964800  | -4.32701000 | -1.67562000 | C | -3.26715400 | -3.36480800 | 0.67797600  |
| H                                  | 1.76882300  | -4.02952600 | -1.19496900 | C | 0.82846000  | 2.41989000  | 0.32981700  |
| C                                  | -4.26647200 | 0.77988700  | 1.32180300  | C | -0.07133500 | 1.44735500  | -0.16131000 |
| H                                  | -4.14255200 | 1.60937100  | 2.02055800  | C | -1.45684100 | 1.91528400  | -0.18618400 |
| H                                  | -5.13965600 | 0.98228000  | 0.68559500  | C | -1.90999800 | 2.96341100  | 0.68006700  |
| H                                  | -4.45969500 | -0.12107600 | 1.90509300  | C | -3.26712800 | 3.36483000  | 0.67797800  |
| N                                  | 0.37349600  | -2.66239800 | -0.44208100 | C | -4.15703800 | 2.85019600  | -0.24192400 |
| N                                  | -3.03311000 | 0.59760700  | 0.56271600  | C | -3.68259900 | 1.94971000  | -1.21384900 |
| B                                  | -0.26451200 | 0.16107300  | -0.27530800 | C | -2.37488200 | 1.50133300  | -1.17802000 |
|                                    |             |             |             | C | -0.94205300 | 3.66905500  | 1.44701400  |
| Transition state <b>TS_BN-[6]H</b> |             |             |             | C | 0.38351000  | 3.47036600  | 1.20306000  |
| C                                  | 2.95290300  | 3.63520100  | 0.02948700  | H | 2.26893800  | 4.48054000  | 0.06216000  |
| N                                  | 2.19504000  | 2.38568300  | 0.04183400  | H | 3.51937100  | 3.70867100  | -0.90369200 |
| C                                  | 2.84859200  | 1.20848300  | -0.28745300 | H | 3.65544000  | 3.70331100  | 0.87018900  |

|                                           |             |             |             |   |             |             |             |
|-------------------------------------------|-------------|-------------|-------------|---|-------------|-------------|-------------|
| H                                         | 4.80675600  | 2.12916500  | -0.55928600 | C | 0.99500800  | -3.56851100 | 0.83938100  |
| H                                         | 4.80675200  | -2.12919100 | -0.55927300 | C | -1.15559600 | -2.68847200 | 1.49275400  |
| H                                         | 2.26890500  | -4.48055900 | 0.06213800  | C | -1.05881600 | -1.73689500 | 0.44084600  |
| H                                         | 3.51937200  | -3.70868400 | -0.90366700 | C | -2.35173500 | -2.76916800 | 2.28158500  |
| H                                         | 3.65538900  | -3.70334800 | 0.87021800  | C | -3.47563800 | -2.08514000 | 1.92969700  |
| H                                         | 1.12058600  | -4.05460200 | 1.74255900  | C | -3.53018100 | -1.44200700 | 0.64988700  |
| H                                         | -1.26617500 | -4.41725700 | 2.16634000  | C | -2.33029600 | -1.31203500 | -0.11800800 |
| H                                         | -2.00531000 | -0.89023400 | -1.98604900 | H | -0.15383900 | -4.34528900 | 2.46747000  |
| H                                         | -4.34180400 | -1.61647700 | -2.01134800 | H | 1.77921200  | -4.31017300 | 0.94328100  |
| H                                         | -5.19256300 | -3.17896200 | -0.25429000 | H | -2.33945100 | -3.40282900 | 3.16569800  |
| H                                         | -3.58133900 | -4.13243700 | 1.38196400  | H | -4.37649300 | -2.13533400 | 2.53599600  |
| H                                         | -3.58130800 | 4.13246200  | 1.38196600  | C | -2.46127800 | -1.05363900 | -1.50204700 |
| H                                         | -5.19253800 | 3.17900000  | -0.25428900 | C | -4.76915600 | -1.09842600 | 0.06178700  |
| H                                         | -4.34179100 | 1.61650800  | -2.01134700 | C | -1.59604300 | 1.77344400  | -1.41573000 |
| H                                         | -2.00530200 | 0.89024800  | -1.98604700 | C | -2.51065200 | 3.92121400  | 0.10400300  |
| H                                         | -1.26614200 | 4.41726200  | 2.16634600  | C | -3.69517000 | -0.81662500 | -2.07939500 |
| H                                         | 1.12061600  | 4.05458900  | 1.74256500  | C | -4.85442600 | -0.78610000 | -1.28209600 |
| H                                         | 5.96760000  | 0.00000200  | -0.86937700 | C | -2.76799500 | 2.42135000  | -1.75516000 |
|                                           |             |             |             | C | -3.25603900 | 3.48427800  | -0.97011100 |
| Transition state <b><i>TS_BN-[7]H</i></b> |             |             |             | H | -1.57205400 | -1.11467800 | -2.12074200 |
| C                                         | 1.18130700  | -2.46150000 | -0.03743800 | H | -3.76985700 | -0.65885000 | -3.15224900 |
| C                                         | 0.24571300  | -1.39737800 | -0.10739800 | H | -5.82024000 | -0.57132400 | -1.73191000 |
| C                                         | 1.35666400  | 2.32253300  | 0.73016600  | H | -5.66921700 | -1.15937200 | 0.66938900  |
| C                                         | 0.43866400  | 1.50922700  | 0.01314300  | H | -1.21093400 | 0.99212300  | -2.05563000 |
| C                                         | 0.89217300  | 3.45746100  | 1.47581600  | H | -3.31642300 | 2.10811500  | -2.63875300 |
| C                                         | -0.82850700 | 2.15077800  | -0.29030000 | H | -4.18887700 | 3.97602900  | -1.23237500 |
| C                                         | -1.27736500 | 3.30607800  | 0.42689600  | H | -2.83237500 | 4.77960900  | 0.68996900  |
| C                                         | -0.39989400 | 3.88492200  | 1.38066000  | N | 2.72900100  | 2.07823800  | 0.72453100  |
| H                                         | 1.56898000  | 4.00307700  | 2.11909900  | N | 2.39212000  | -2.41110400 | -0.75011700 |
| H                                         | -0.73591900 | 4.73790000  | 1.96581700  | B | 0.91915600  | 0.03962800  | -0.26569500 |
| C                                         | -0.08387800 | -3.59269800 | 1.68567300  | C | 3.62392900  | 2.90277700  | 1.53444200  |

|                                            |            |             |             |   |             |             |             |
|--------------------------------------------|------------|-------------|-------------|---|-------------|-------------|-------------|
| H                                          | 3.75181500 | 3.91246000  | 1.12376500  | C | 6.89850627  | 3.45707100  | -0.38500000 |
| H                                          | 3.24150000 | 2.98403400  | 2.55533200  | C | 2.25250627  | 5.62107100  | -0.57900000 |
| H                                          | 4.59587400 | 2.41713200  | 1.59220300  | C | -1.01049373 | 2.18507100  | 0.60500000  |
| C                                          | 3.02369600 | -3.65366400 | -1.17260100 | H | -1.23849373 | 2.88507100  | 1.40500000  |
| H                                          | 3.43382000 | -3.52738000 | -2.17907600 | H | -0.93349373 | 1.19507100  | 1.04500000  |
| H                                          | 3.83842000 | -3.96555200 | -0.50339400 | H | -1.83649373 | 2.19007100  | -0.11300000 |
| H                                          | 2.27300400 | -4.44268600 | -1.21622100 | C | 1.21750627  | -0.67992900 | -1.51200000 |
| C                                          | 2.45202100 | -0.04639400 | -0.36765600 | H | 0.75050627  | -1.62992900 | -1.74200000 |
| C                                          | 3.10440900 | -1.22438600 | -0.82447300 | C | 7.02750627  | 4.81207100  | -0.77300000 |
| C                                          | 3.28063700 | 1.05743800  | -0.05066000 | H | 8.01950627  | 5.23507100  | -0.87500000 |
| C                                          | 4.44779400 | -1.19973700 | -1.23854700 | C | 8.03350627  | 2.66807100  | -0.09300000 |
| C                                          | 4.62957800 | 1.09091500  | -0.45020600 | H | 9.01650627  | 3.10307100  | -0.22900000 |
| C                                          | 5.17608600 | -0.02403600 | -1.07670500 | C | 5.49150627  | 1.60907100  | 0.29500000  |
| H                                          | 4.94035500 | -2.08288000 | -1.62519400 | H | 4.51450627  | 1.19607100  | 0.49200000  |
| H                                          | 5.23715700 | 1.97681000  | -0.30860800 | C | 0.47750627  | 0.29607100  | -0.87300000 |
| H                                          | 6.21183300 | 0.00734600  | -1.40551800 | H | -0.55849373 | 0.09407100  | -0.64900000 |
|                                            |            |             |             | C | -0.36749373 | 4.89107100  | 0.11700000  |
| Ground state of model ( <i>M</i> )-BN-[5]H |            |             |             | H | -1.39449373 | 4.65007100  | 0.34000000  |
| N                                          | 0.26150627 | 2.54707100  | 0.00000000  | C | 7.89750627  | 1.38707100  | 0.37600000  |
| N                                          | 3.54450627 | 5.95307100  | -0.97400000 | H | 8.76950627  | 0.78907100  | 0.60500000  |
| C                                          | 5.58950627 | 2.91707100  | -0.23900000 | C | 0.00150627  | 6.22307100  | -0.00300000 |
| C                                          | 3.10650627 | 0.78207100  | -1.58100000 | C | 5.93550627  | 5.60307100  | -0.95700000 |
| C                                          | 4.42750627 | 3.70707100  | -0.55600000 | H | 6.08950627  | 6.64807100  | -1.17100000 |
| C                                          | 4.61650627 | 5.07507100  | -0.83100000 | C | 1.28650627  | 6.60907100  | -0.35000000 |
| C                                          | 1.92050627 | 4.25707100  | -0.43100000 | H | 1.52450627  | 7.66007100  | -0.40600000 |
| C                                          | 2.40550627 | 1.79507100  | -0.90600000 | C | 3.77350627  | 7.29007100  | -1.51000000 |
| C                                          | 0.59150627 | 3.89407100  | -0.10100000 | H | 2.85750627  | 7.64807100  | -1.97000000 |
| C                                          | 1.04650627 | 1.55007100  | -0.58200000 | H | 4.53350627  | 7.25007100  | -2.28500000 |
| C                                          | 2.53950627 | -0.43892900 | -1.88700000 | H | 4.08550627  | 8.00307100  | -0.74300000 |
| C                                          | 6.60750627 | 0.86607100  | 0.59000000  | B | 2.97850627  | 3.19507100  | -0.61500000 |
| H                                          | 6.49250627 | -0.12892900 | 1.00200000  | H | -0.74449373 | 6.98907100  | 0.17400000  |

|                                            |             |             |             |                                            |             |             |             |
|--------------------------------------------|-------------|-------------|-------------|--------------------------------------------|-------------|-------------|-------------|
| H                                          | 4.13150627  | 0.97407100  | -1.87000000 | C                                          | 2.90384939  | -0.71613401 | -0.53700000 |
| H                                          | 3.10750627  | -1.19592900 | -2.41200000 | H                                          | 2.51284939  | 0.28086599  | -0.66800000 |
|                                            |             |             |             | C                                          | 0.58784939  | 3.84986599  | 0.29600000  |
| Ground state of model ( <i>M</i> )-BN-[6]H |             |             |             | H                                          | -0.01115061 | 4.66086599  | -0.08500000 |
| N                                          | -1.27615061 | 2.33786599  | 0.00000000  | C                                          | -3.39815061 | 1.21286599  | 0.40000000  |
| N                                          | -1.27615061 | -2.20913401 | 1.59000000  | H                                          | -3.96715061 | 2.09086599  | 0.13700000  |
| C                                          | 2.12684939  | -1.67013401 | 0.16200000  | C                                          | 4.66184939  | -2.33013401 | -0.91900000 |
| C                                          | 2.12684939  | 1.79986599  | 1.42800000  | H                                          | 5.63484939  | -2.56713401 | -1.32900000 |
| C                                          | 0.84184939  | -1.34613401 | 0.72300000  | C                                          | -4.06715061 | 0.06386599  | 0.79500000  |
| C                                          | 0.04884939  | -2.40313401 | 1.20500000  | C                                          | 3.92284939  | 3.42186599  | 1.86800000  |
| C                                          | -1.28615061 | 0.06486599  | 0.79500000  | H                                          | 4.29884939  | 4.43386599  | 1.77300000  |
| C                                          | 0.84184939  | 1.47586599  | 0.86700000  | C                                          | 0.58784939  | -3.72013401 | 1.29400000  |
| C                                          | 2.90384939  | 0.84486599  | 2.12600000  | H                                          | -0.01015061 | -4.53113401 | 1.67500000  |
| H                                          | 2.51284939  | -0.15113401 | 2.25800000  | C                                          | -3.39815061 | -1.08513401 | 1.19000000  |
| C                                          | -1.99715061 | 1.21786599  | 0.39800000  | H                                          | -3.96715061 | -1.96213401 | 1.45300000  |
| C                                          | 0.04884939  | 2.53186599  | 0.38500000  | C                                          | 4.66084939  | 2.45986599  | 2.50900000  |
| C                                          | 2.64984939  | 3.12086599  | 1.33500000  | H                                          | 5.63484939  | 2.69686599  | 2.91900000  |
| C                                          | 4.13284939  | -1.03313401 | -1.05900000 | C                                          | 4.13284939  | 1.16286599  | 2.64900000  |
| H                                          | 4.70084939  | -0.27813401 | -1.58700000 | H                                          | 4.70084939  | 0.40686599  | 3.17700000  |
| C                                          | 2.64984939  | -2.99113401 | 0.25500000  | C                                          | -1.97015061 | -3.24413401 | 2.34500000  |
| C                                          | -1.99715061 | -1.08913401 | 1.19200000  | H                                          | -2.75815061 | -2.78313401 | 2.93300000  |
| C                                          | -1.97115061 | 3.37286599  | -0.75500000 | H                                          | -1.28015061 | -3.71913401 | 3.03700000  |
| H                                          | -2.75815061 | 2.91186599  | -1.34300000 | H                                          | -2.41315061 | -4.01113401 | 1.70300000  |
| H                                          | -1.28115061 | 3.84786599  | -1.44700000 | B                                          | 0.22484939  | 0.06486599  | 0.79500000  |
| H                                          | -2.41415061 | 4.13886599  | -0.11300000 | H                                          | -5.15015061 | 0.06386599  | 0.79500000  |
| C                                          | 1.84884939  | 4.11986599  | 0.73300000  |                                            |             |             |             |
| H                                          | 2.23684939  | 5.12886599  | 0.66000000  | Ground state of model ( <i>M</i> )-BN-[7]H |             |             |             |
| C                                          | 1.84884939  | -3.99013401 | 0.85700000  | N                                          | -1.09832634 | 2.41108774  | 0.00000000  |
| H                                          | 2.23784939  | -4.99913401 | 0.93000000  | N                                          | -0.59932634 | 7.15508774  | 0.74800000  |
| C                                          | 3.92284939  | -3.29213401 | -0.27800000 | C                                          | -4.23332634 | 6.69208774  | 0.06900000  |
| H                                          | 4.29884939  | -4.30413401 | -0.18300000 | C                                          | -2.88132634 | 6.32908774  | 0.36700000  |

|   |             |            |             |   |             |            |             |
|---|-------------|------------|-------------|---|-------------|------------|-------------|
| C | -4.74132634 | 7.93908774 | 0.49600000  | C | -0.26032634 | 3.50508774 | 0.18000000  |
| C | -5.12832634 | 5.81808774 | -0.66000000 | C | 1.38367366  | 5.75708774 | 0.49600000  |
| C | -6.13832634 | 8.21608774 | 0.42200000  | H | 2.05667366  | 6.58408774 | 0.64400000  |
| H | -6.49432634 | 9.16408774 | 0.80800000  | C | -0.84032634 | 4.77208774 | 0.41400000  |
| C | -1.98032634 | 7.35808774 | 0.72100000  | C | -5.00032634 | 2.20408774 | 1.60200000  |
| C | -3.05532634 | 3.57708774 | 0.88500000  | C | -6.93132634 | 4.09308774 | -1.97000000 |
| C | -3.84132634 | 8.87408774 | 1.05100000  | H | -7.61932634 | 3.41308774 | -2.45500000 |
| H | -4.22632634 | 9.81808774 | 1.41700000  | C | -7.40432634 | 5.20208774 | -1.31100000 |
| C | -2.50132634 | 8.62308774 | 1.11300000  | H | -8.46632634 | 5.41508774 | -1.28600000 |
| C | -4.67232634 | 4.72308774 | -1.42100000 | C | -5.54832634 | 3.87108774 | -2.05100000 |
| H | -3.61132634 | 4.55908774 | -1.52400000 | H | -5.16732634 | 3.03408774 | -2.62200000 |
| C | -4.32632634 | 3.45708774 | 1.54700000  | C | 1.92167366  | 4.49708774 | 0.28400000  |
| C | -6.52332634 | 6.09908774 | -0.67400000 | C | 0.28867366  | 8.30708774 | 0.86500000  |
| C | -0.01032634 | 5.91008774 | 0.54200000  | H | 0.69367366  | 8.40908774 | 1.87500000  |
| C | -6.17532634 | 4.42808774 | 2.79600000  | H | 1.11267366  | 8.20408774 | 0.16500000  |
| H | -6.61932634 | 5.28708774 | 3.28200000  | H | -0.23532634 | 9.21508774 | 0.59700000  |
| C | -4.94432634 | 4.54808774 | 2.20100000  | C | -4.34532634 | 1.06608774 | 1.07400000  |
| H | -4.42932634 | 5.49408774 | 2.24300000  | H | -4.84632634 | 0.10708774 | 1.11800000  |
| C | -2.40632634 | 2.39708774 | 0.48600000  | C | -6.86332634 | 3.20008774 | 2.78300000  |
| C | -0.55232634 | 1.21908774 | -0.63600000 | H | -7.83832634 | 3.11908774 | 3.24500000  |
| H | -1.32132634 | 0.73508774 | -1.23200000 | C | 1.13167366  | 3.37108774 | 0.11000000  |
| H | 0.24767366  | 1.51308774 | -1.30900000 | H | 1.60267366  | 2.41008774 | -0.02200000 |
| H | -0.15732634 | 0.49808774 | 0.08600000  | C | -6.27232634 | 2.10508774 | 2.20600000  |
| C | -3.08332634 | 1.14508774 | 0.57000000  | H | -6.76832634 | 1.14208774 | 2.21700000  |
| H | -2.59532634 | 0.23708774 | 0.25500000  | B | -2.33832634 | 4.89808774 | 0.53400000  |
| C | -7.00532634 | 7.30708774 | -0.08800000 | H | 2.99867366  | 4.38808774 | 0.26600000  |
| H | -8.07032634 | 7.50308774 | -0.10500000 | H | -1.85832634 | 9.38008774 | 1.53200000  |

## 7. NMR spectra and high-resolution mass spectrometry

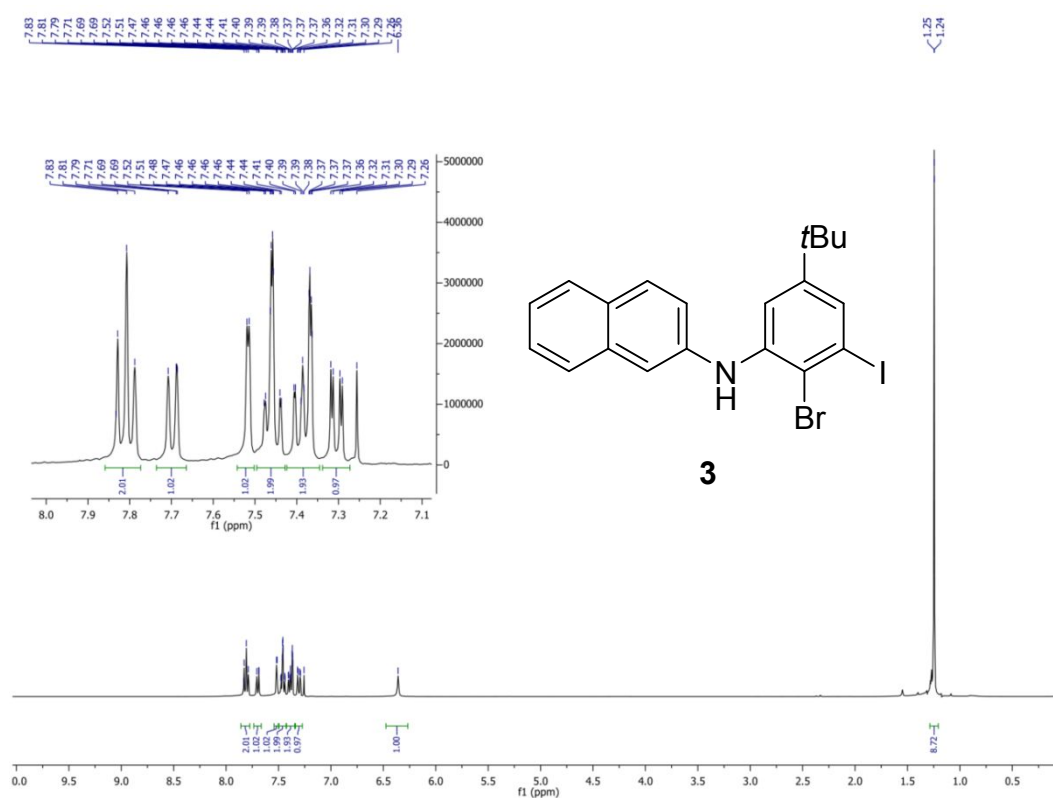

**Figure S24**  $^1\text{H}$  NMR spectrum of compound **3** in  $\text{CDCl}_3$  (400 MHz, 298 K).

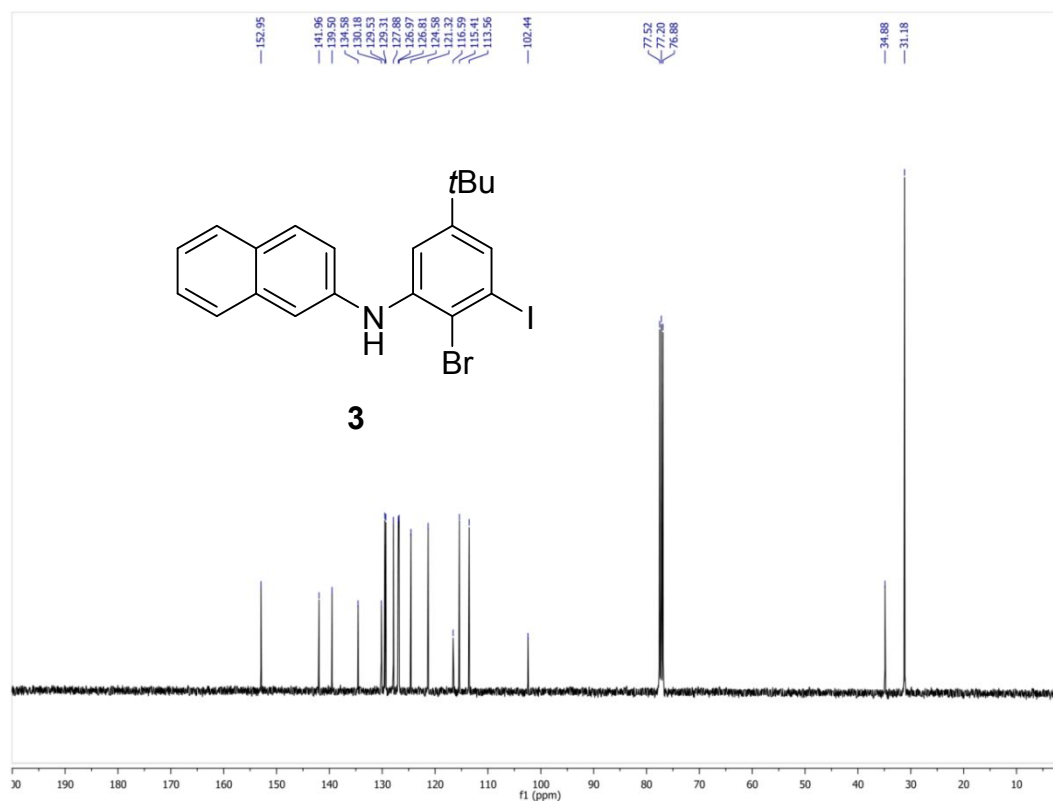

**Figure S25**  $^{13}\text{C}$  NMR spectrum of compound **3** in  $\text{CDCl}_3$  (101 MHz, 298 K).



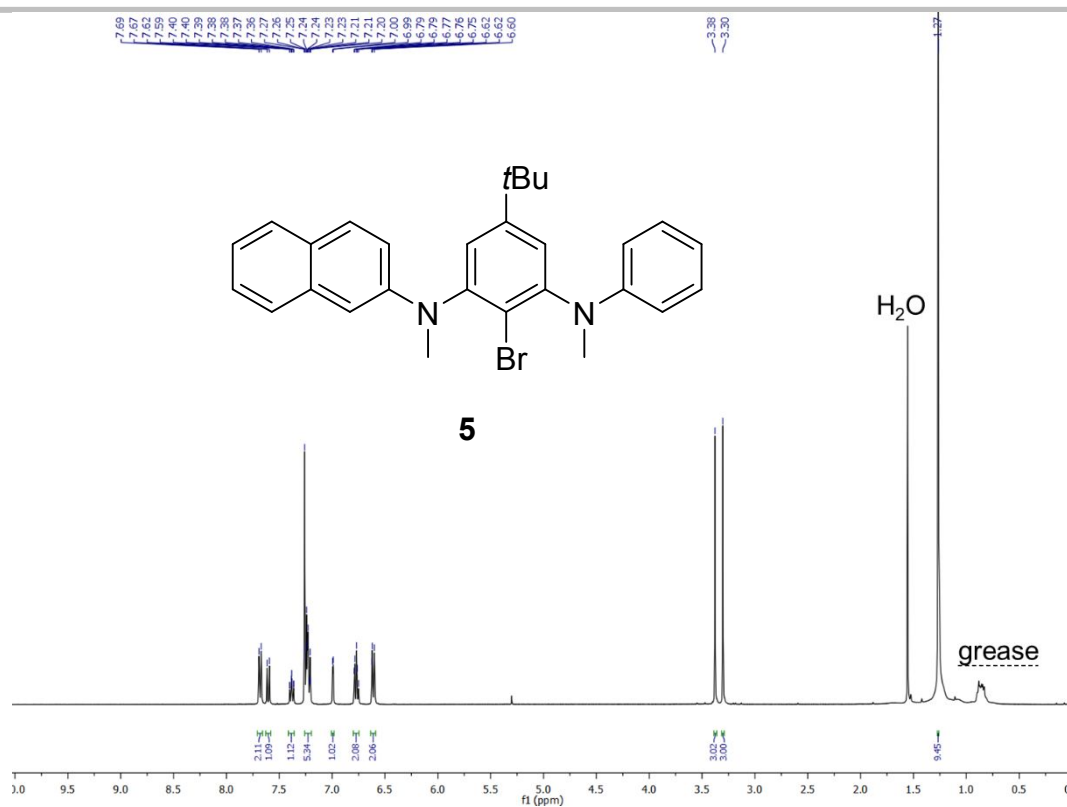

Figure S26 <sup>1</sup>H NMR spectrum of compound **5** in CDCl<sub>3</sub> (400 MHz, 298 K).

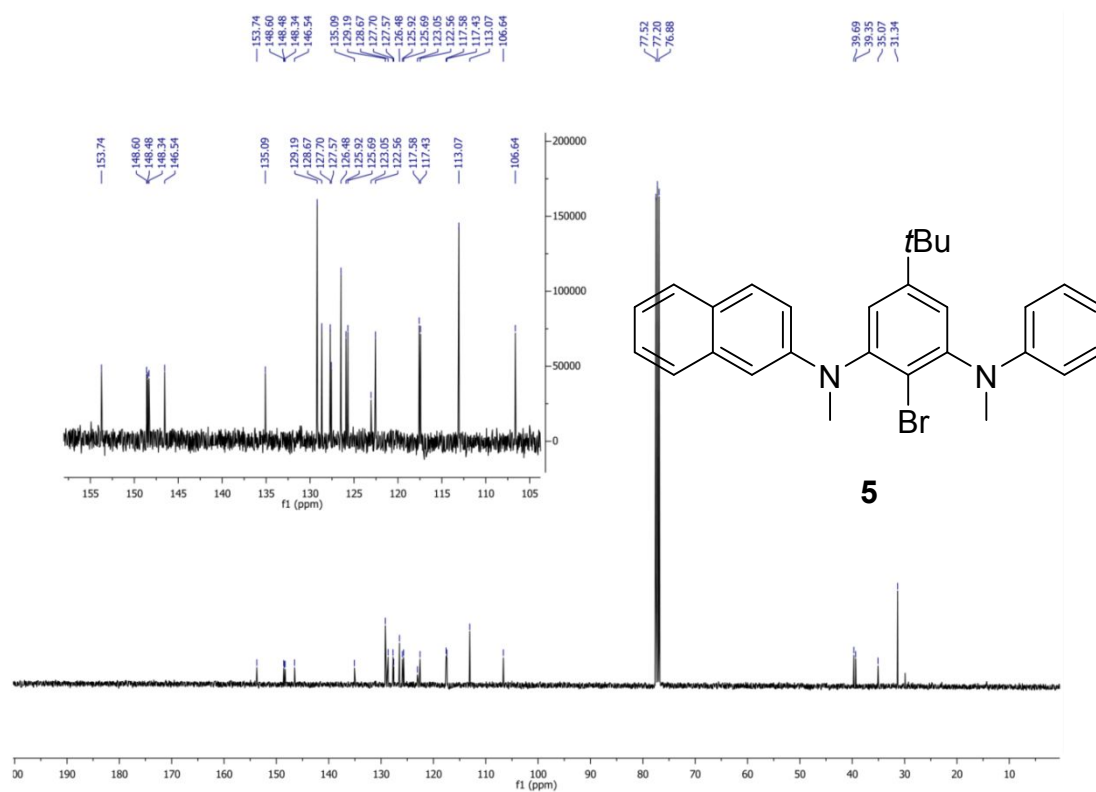

Figure S27 <sup>13</sup>C NMR spectrum of compound **5** in CDCl<sub>3</sub> (101 MHz, 298 K).

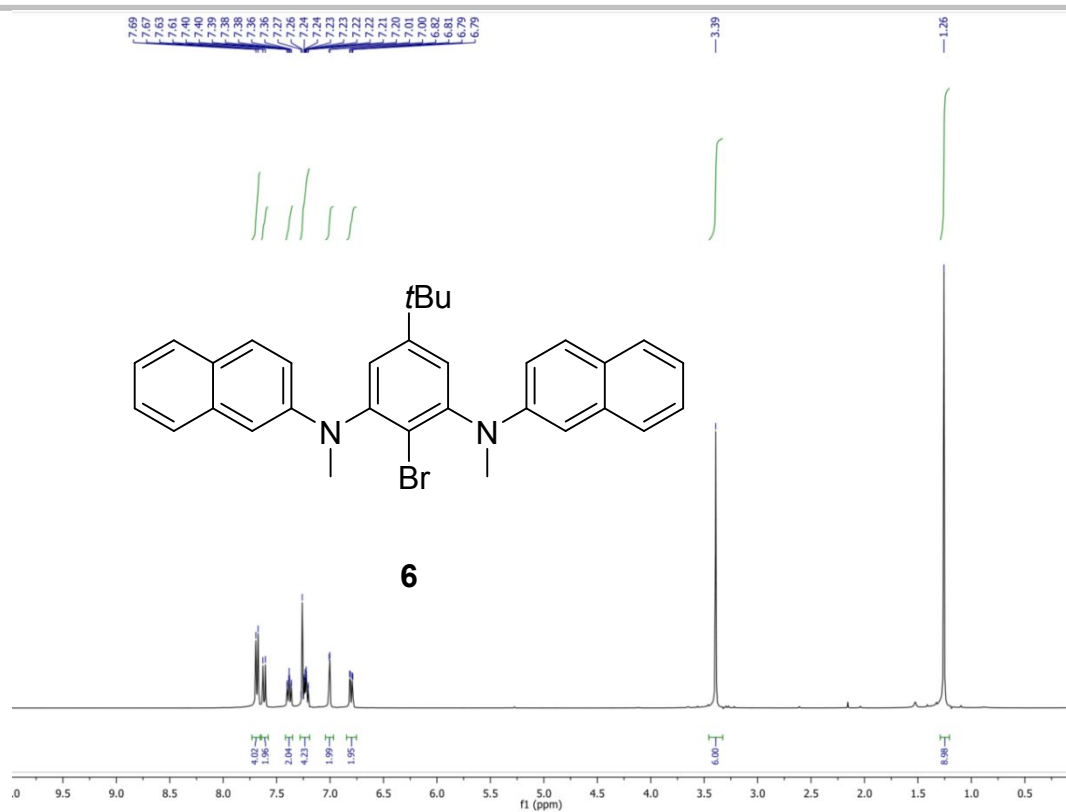

**Figure S28** <sup>1</sup>H NMR spectrum of compound **6** in CDCl<sub>3</sub> (400 MHz, 298 K).

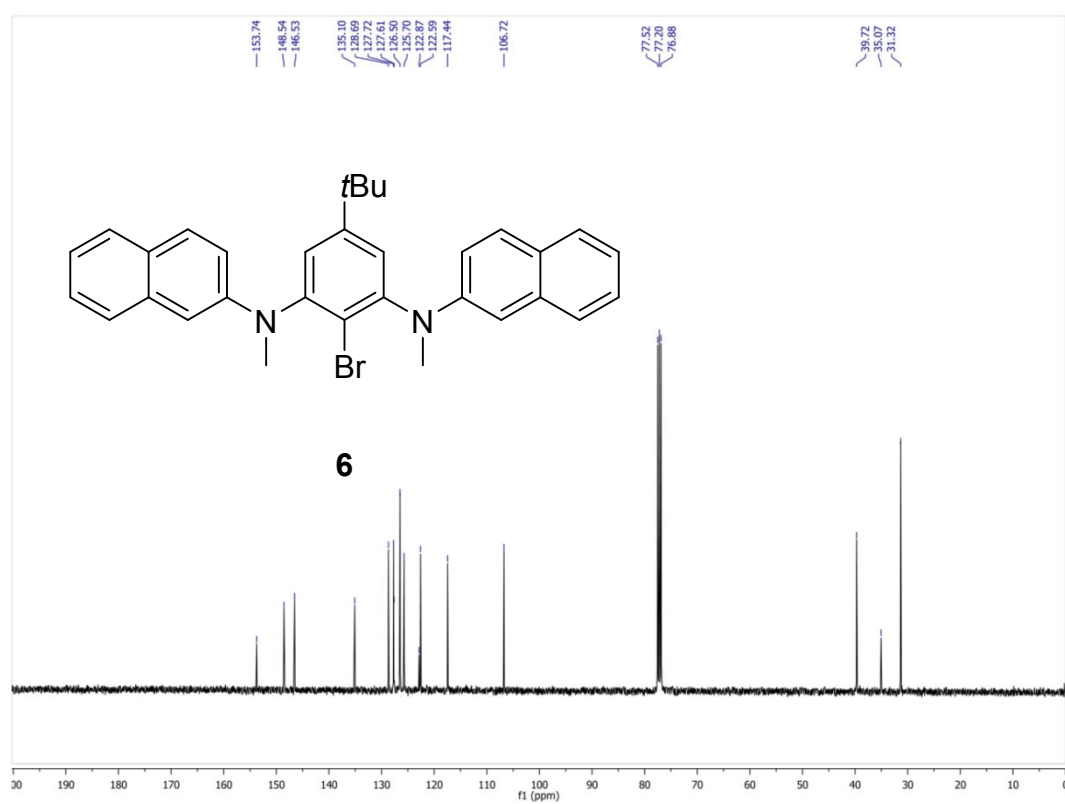

**Figure S29** <sup>13</sup>C NMR spectrum of compound **6** in CDCl<sub>3</sub> (101 MHz, 298 K).

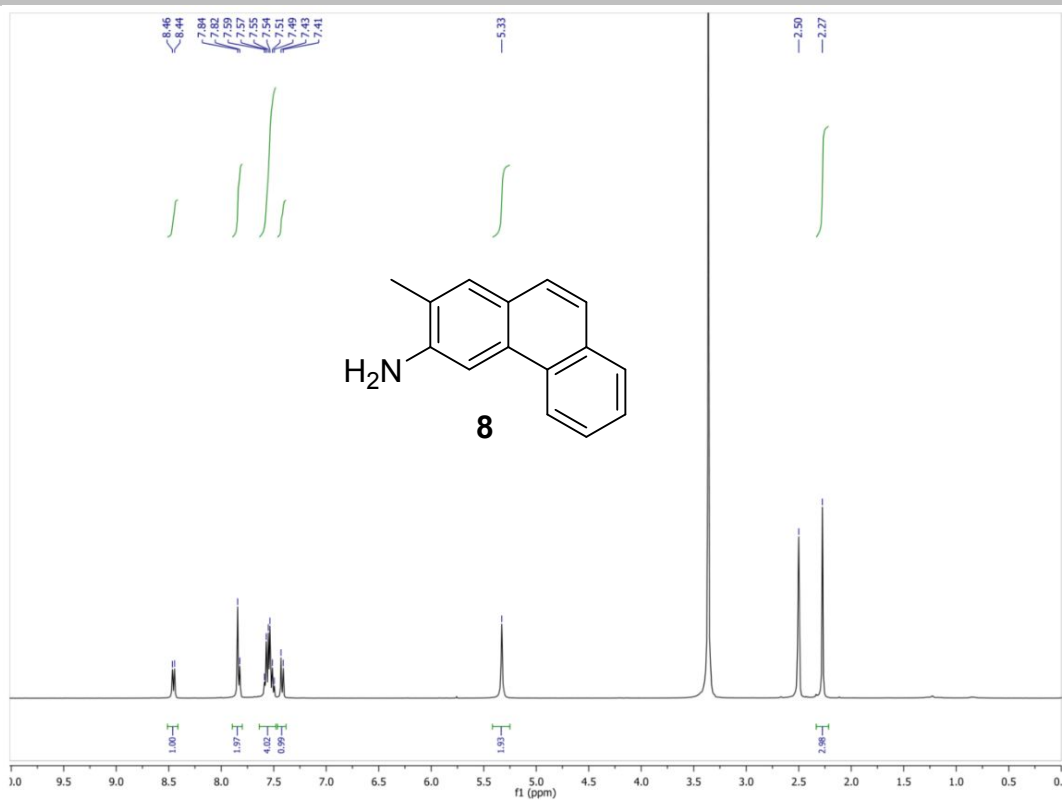

**Figure S30** <sup>1</sup>H NMR spectrum of compound **8** in DMSO-*d*<sub>6</sub> (400 MHz, 298 K).

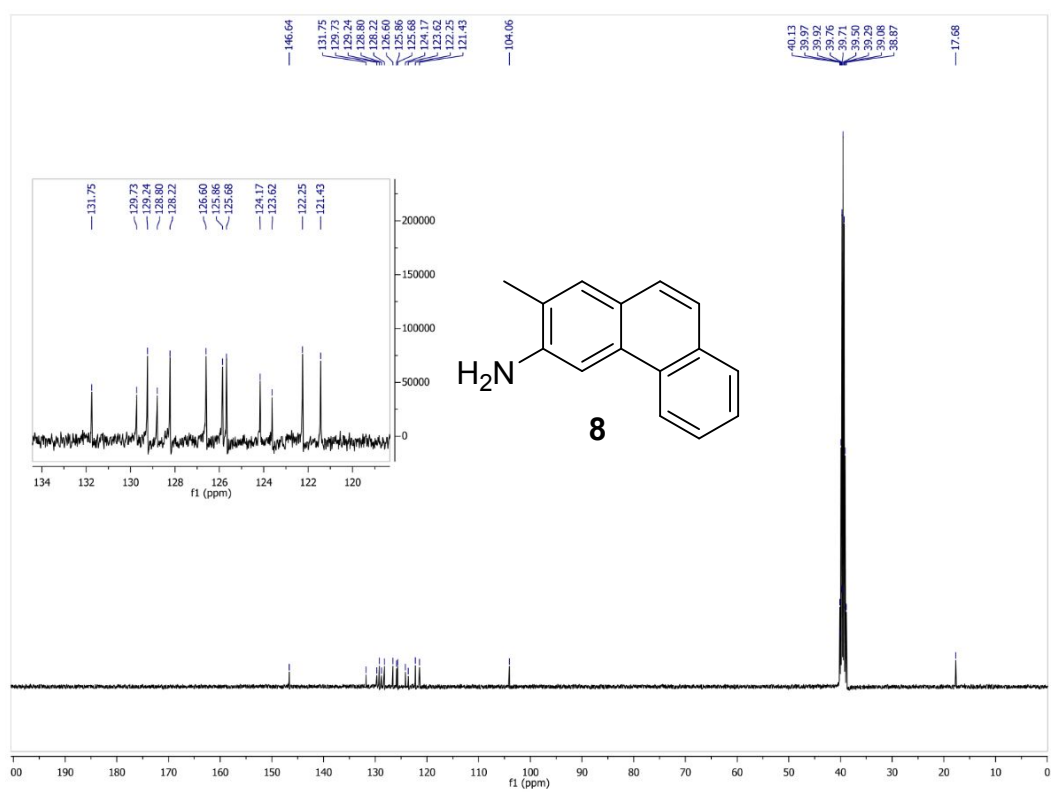

**Figure S31** <sup>13</sup>C NMR spectrum of compound **8** in DMSO-*d*<sub>6</sub> (101 MHz, 298 K).



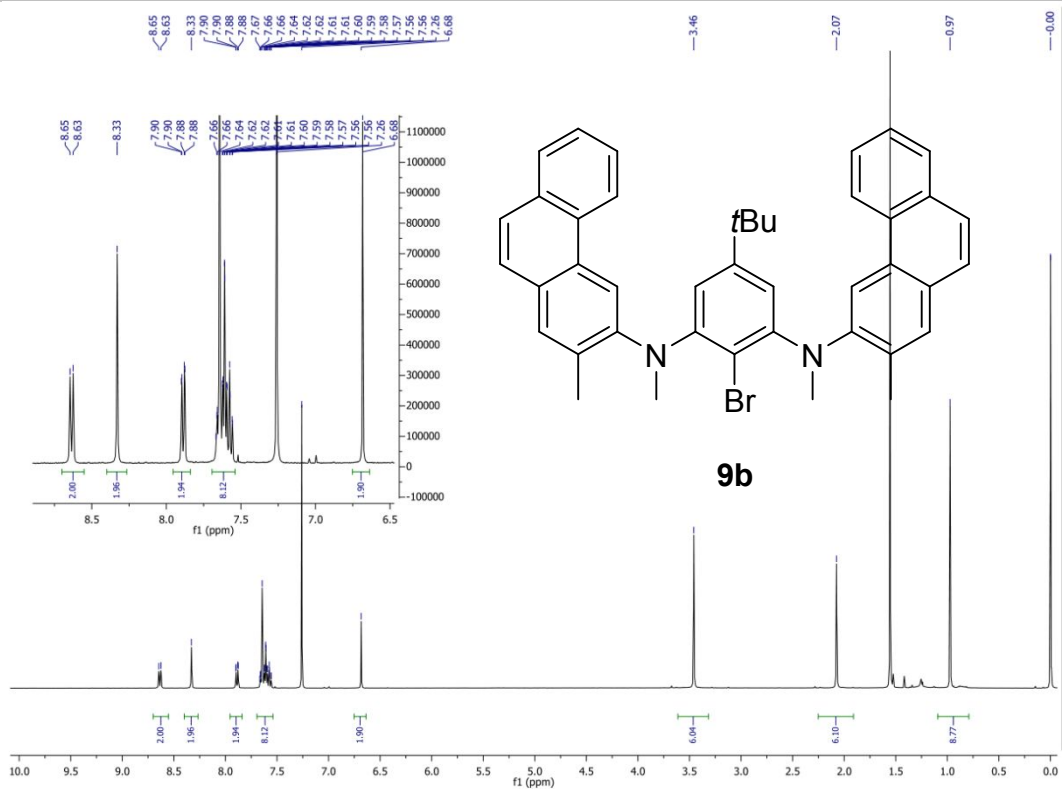

**Figure S34**  $^1\text{H}$  NMR spectrum of compound **9b** in  $\text{CDCl}_3$  (400 MHz, 298 K).

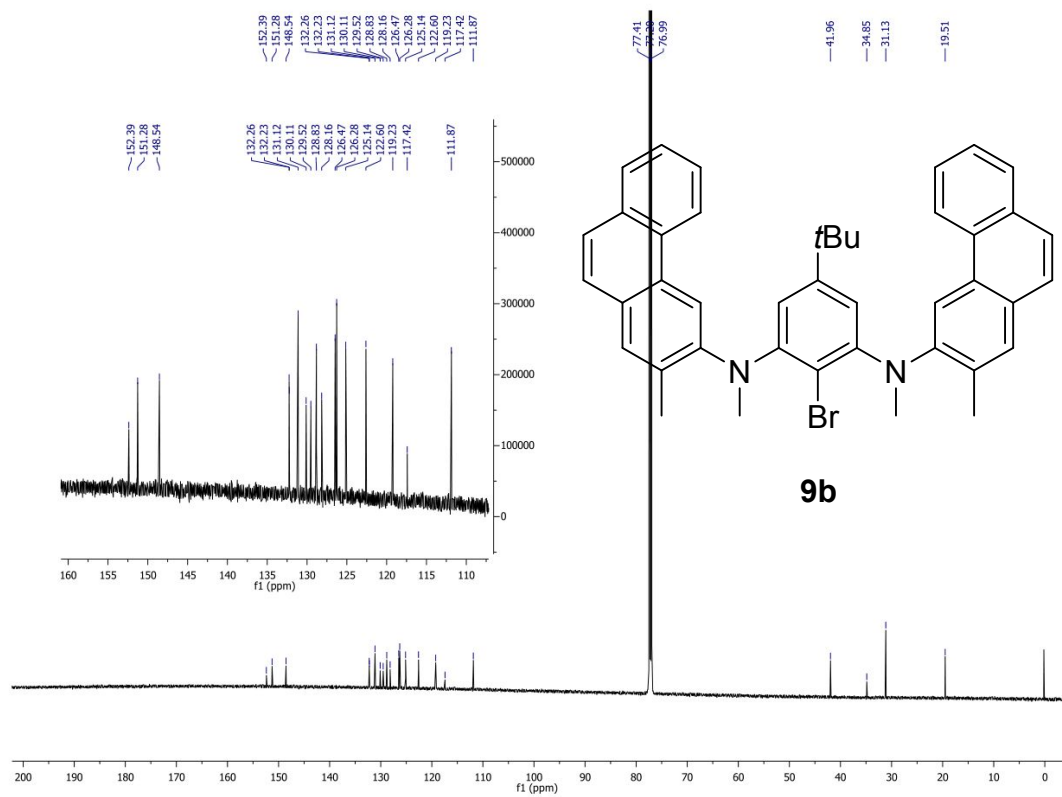

**Figure S35**  $^{13}\text{C}$  NMR spectrum of compound **9b** in  $\text{CDCl}_3$  (151 MHz, 298 K).

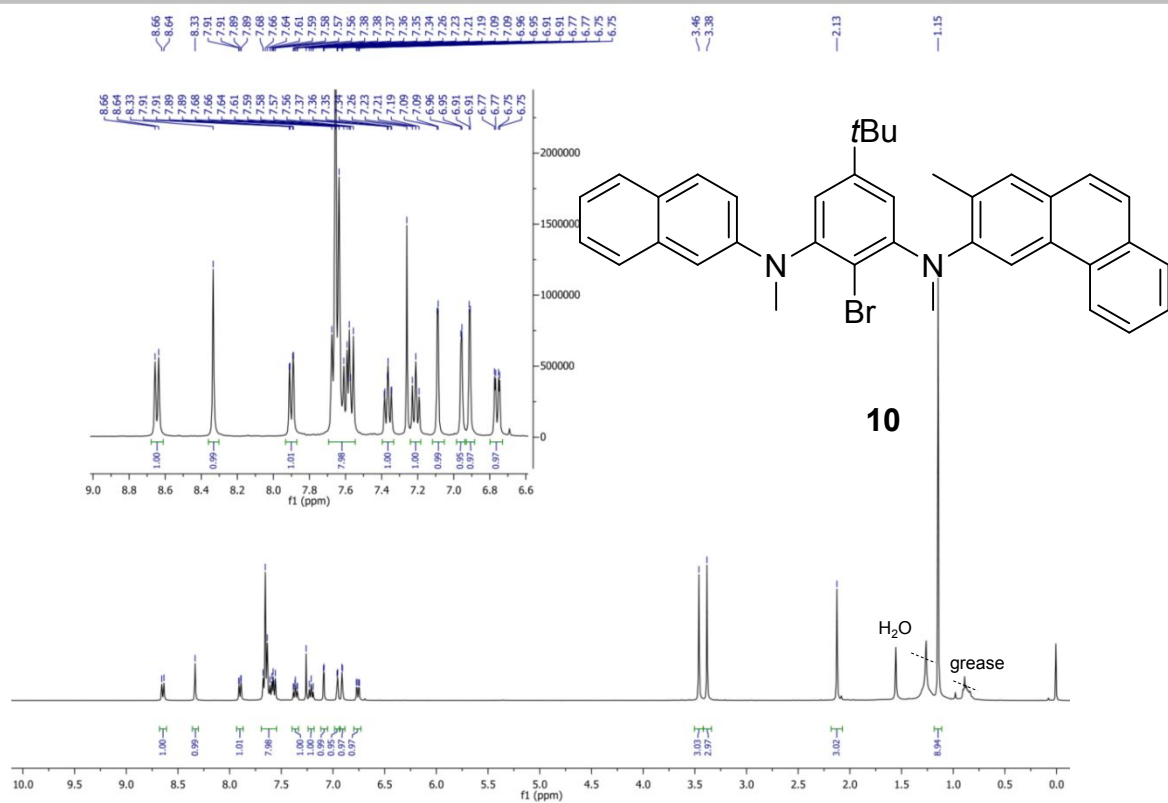

**Figure S36**  $^1\text{H}$  NMR spectrum of compound **10** in  $\text{CDCl}_3$  (400 MHz, 298 K).

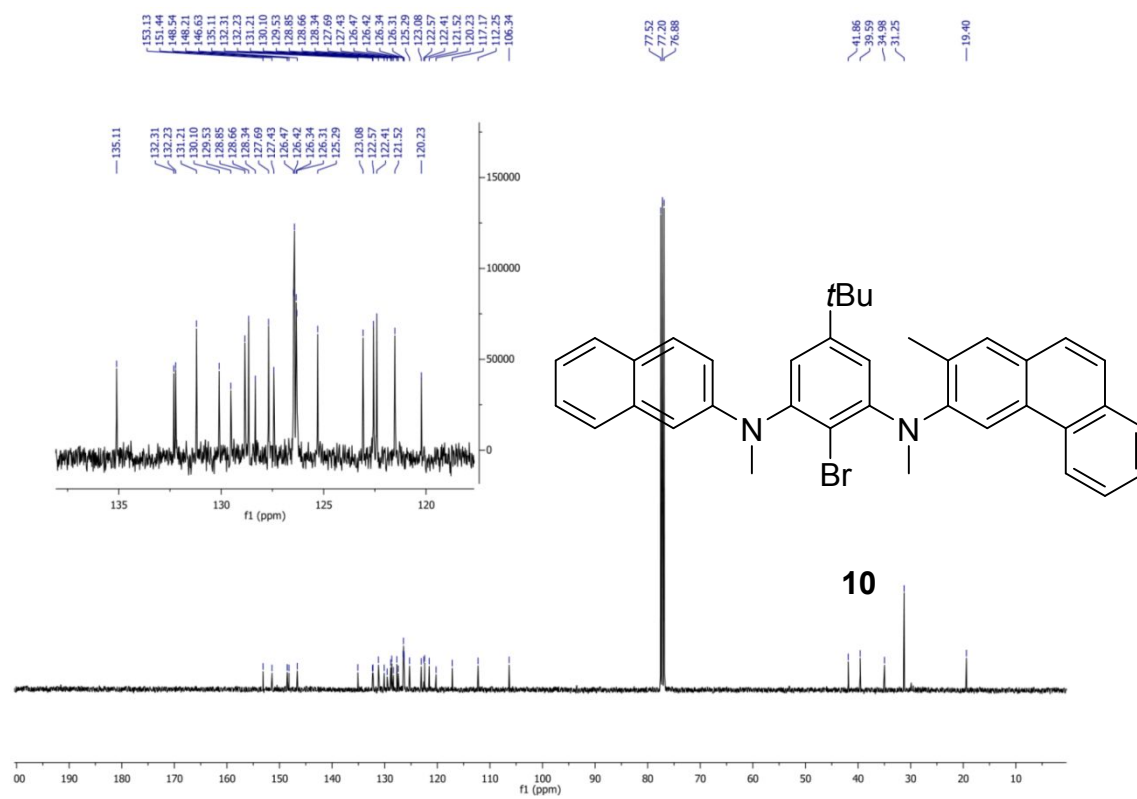

**Figure S37**  $^{13}\text{C}$  NMR spectrum of compound **10** in  $\text{CDCl}_3$  (101 MHz, 298 K).

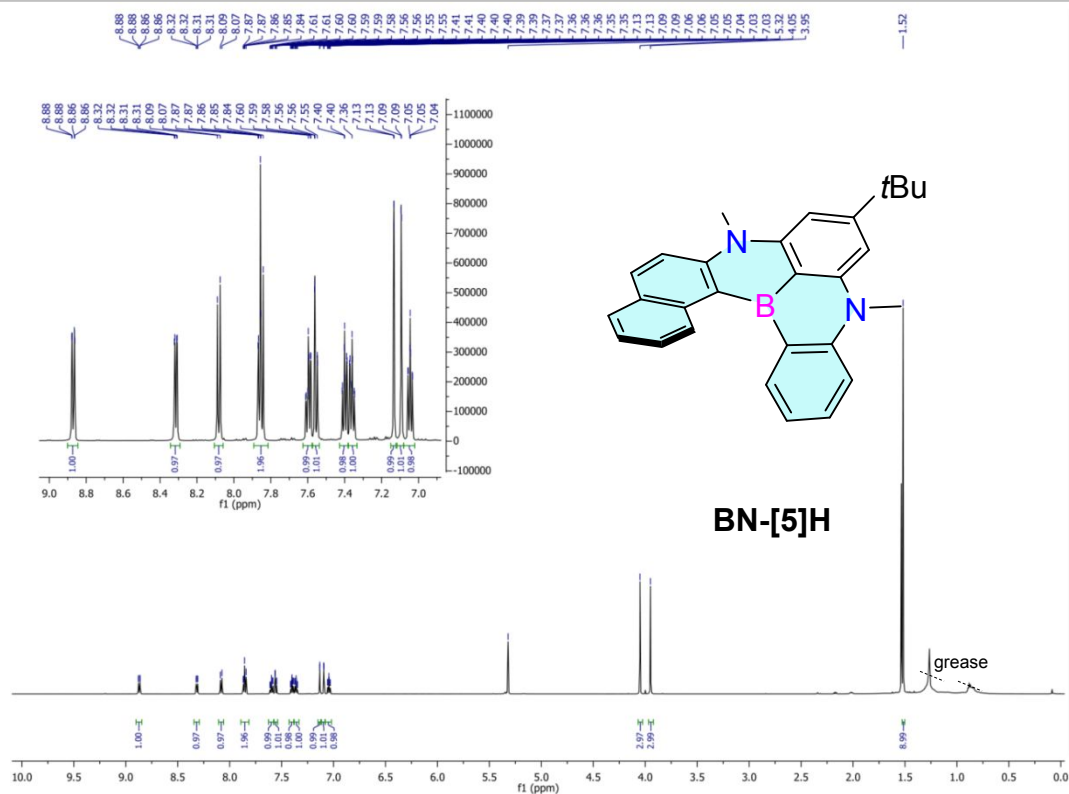

Figure S38  $^1\text{H}$  NMR spectrum of BN-[5]H in  $\text{CD}_2\text{Cl}_2$  (600 MHz, 298 K).

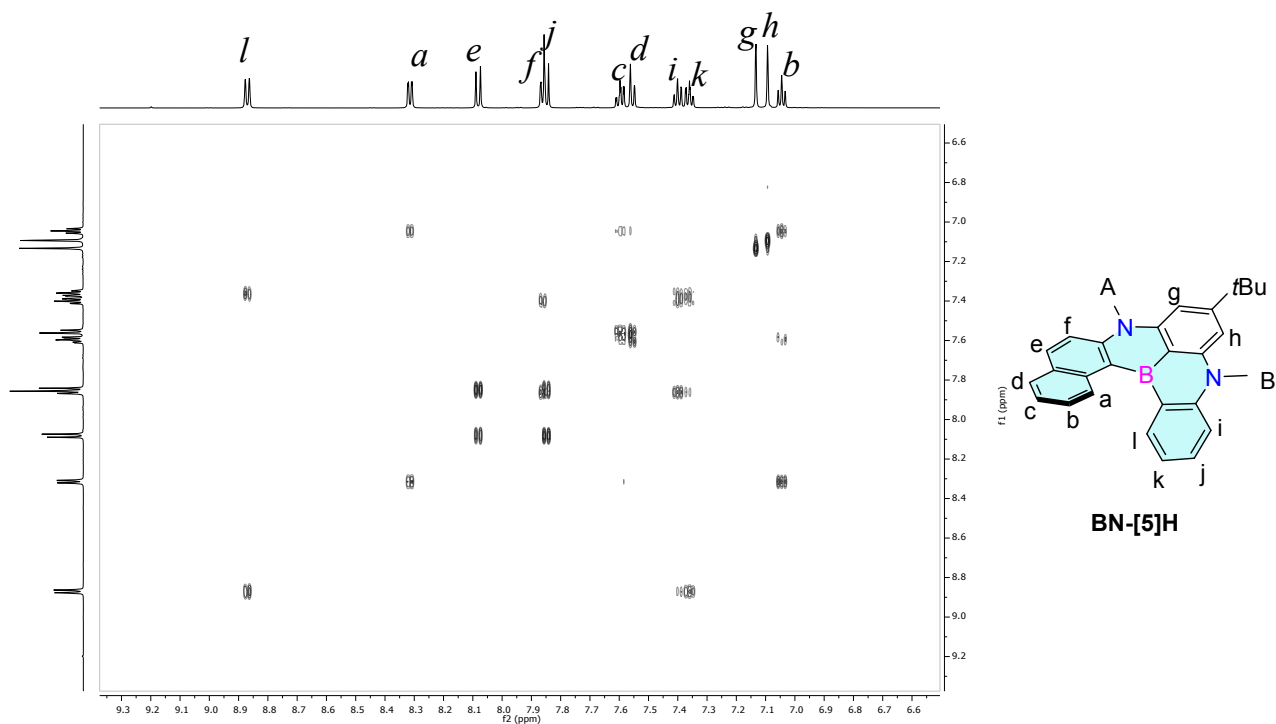

Figure S39  $^1\text{H}$ - $^1\text{H}$  COSY spectrum of BN-[5]H in  $\text{CD}_2\text{Cl}_2$  (298 K).

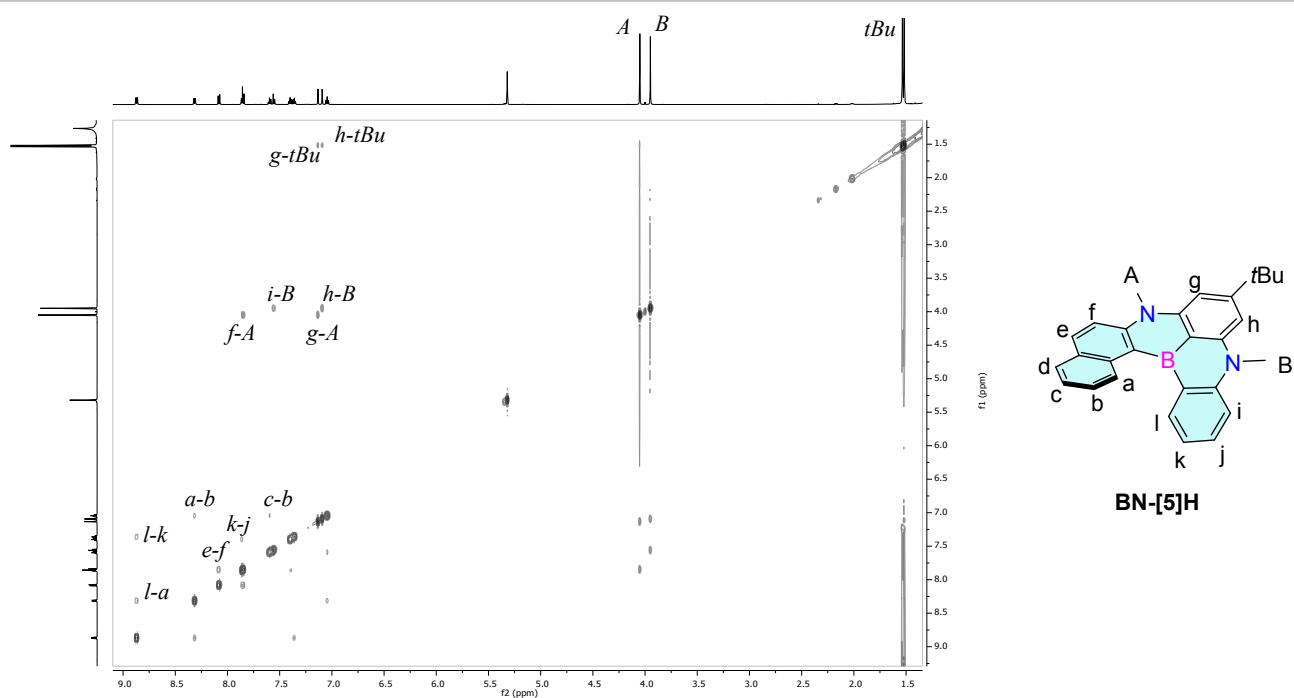

Figure S40 2D-NOesy spectrum of BN-[5]H in CD<sub>2</sub>Cl<sub>2</sub> (298 K).

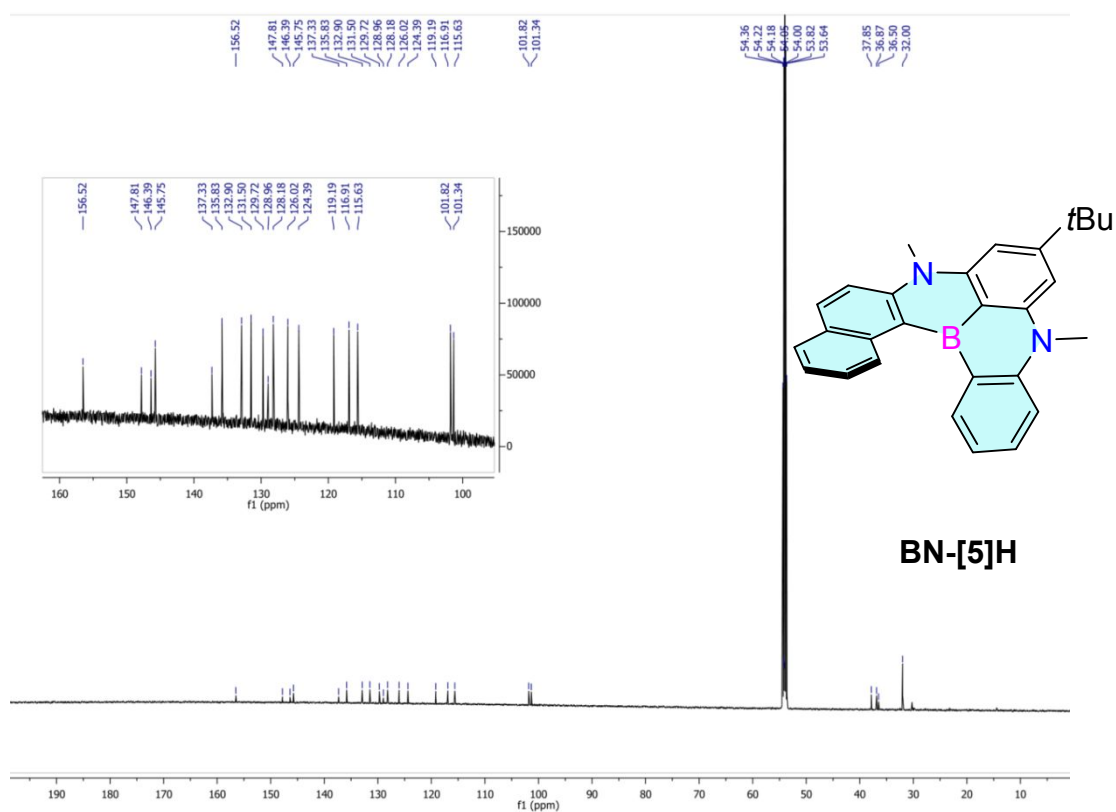

Figure S41 <sup>13</sup>C NMR spectrum of BN-[5]H in CD<sub>2</sub>Cl<sub>2</sub> (151 MHz, 298 K).



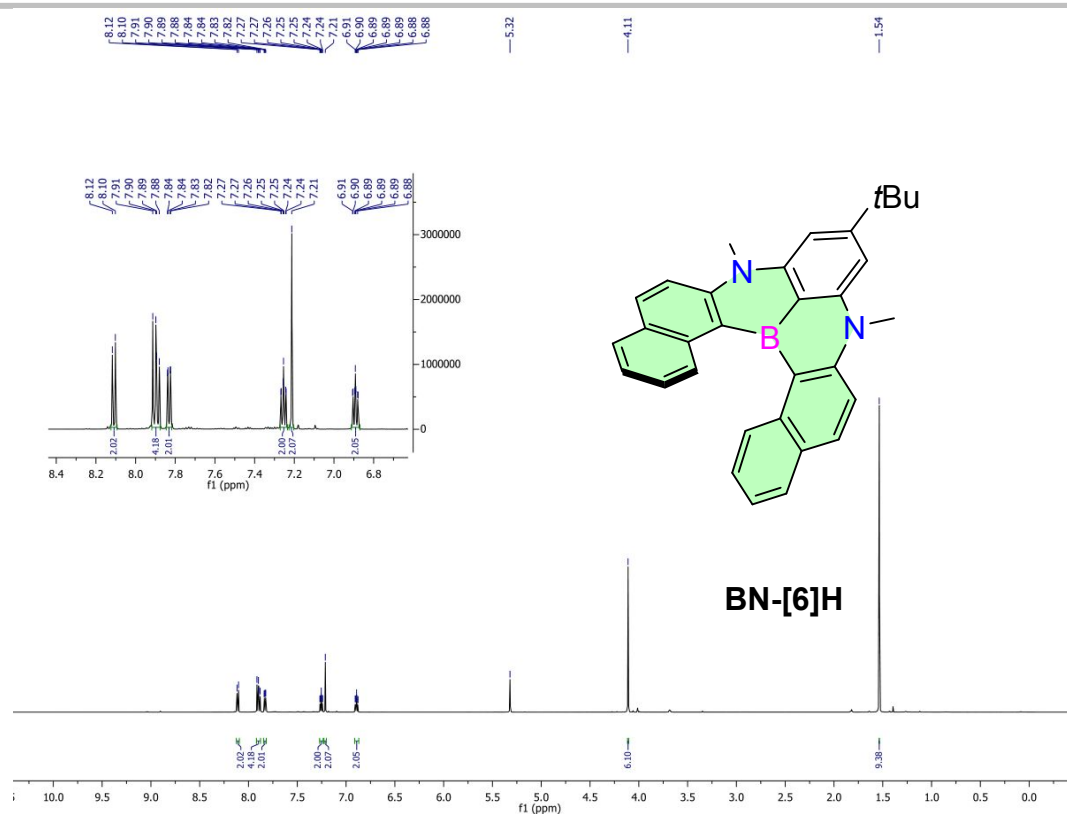

Figure S42  $^1\text{H}$  NMR spectrum of **BN-[6]H** in  $\text{CD}_2\text{Cl}_2$  (600 MHz, 298 K).

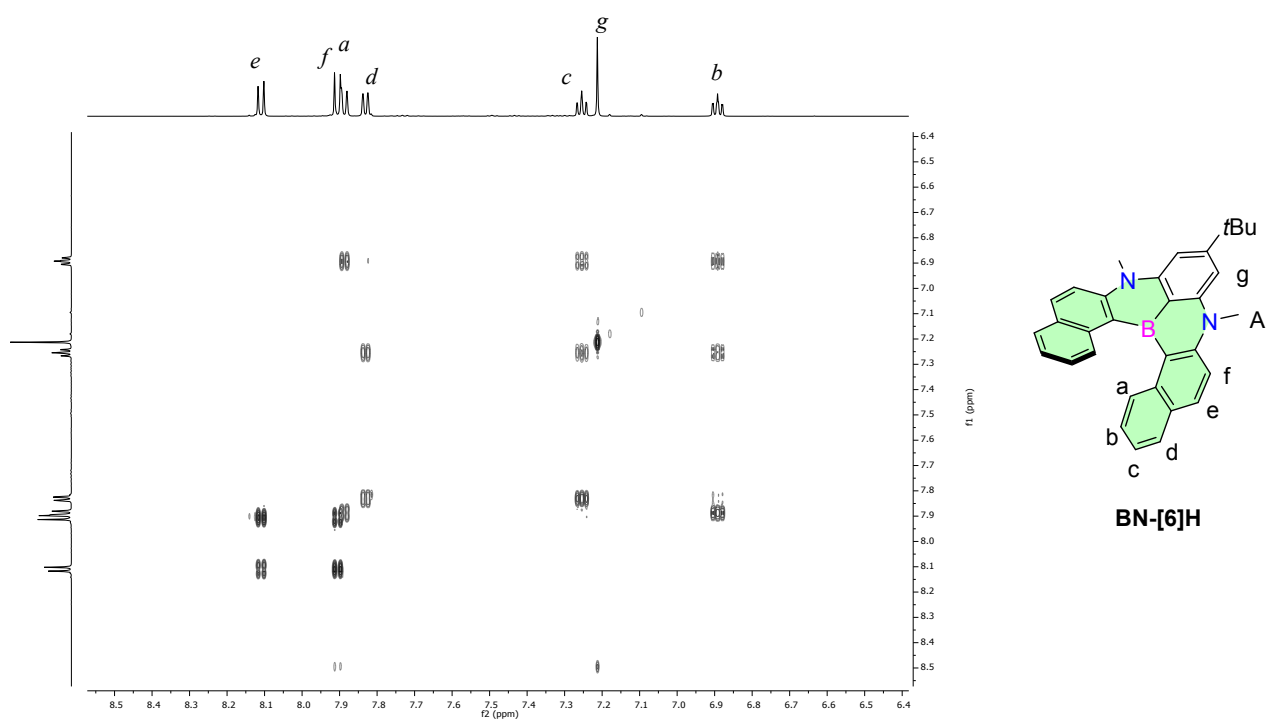

Figure S43  $^1\text{H}$ - $^1\text{H}$  COSY spectrum of **BN-[6]H** in  $\text{CD}_2\text{Cl}_2$  (298 K).

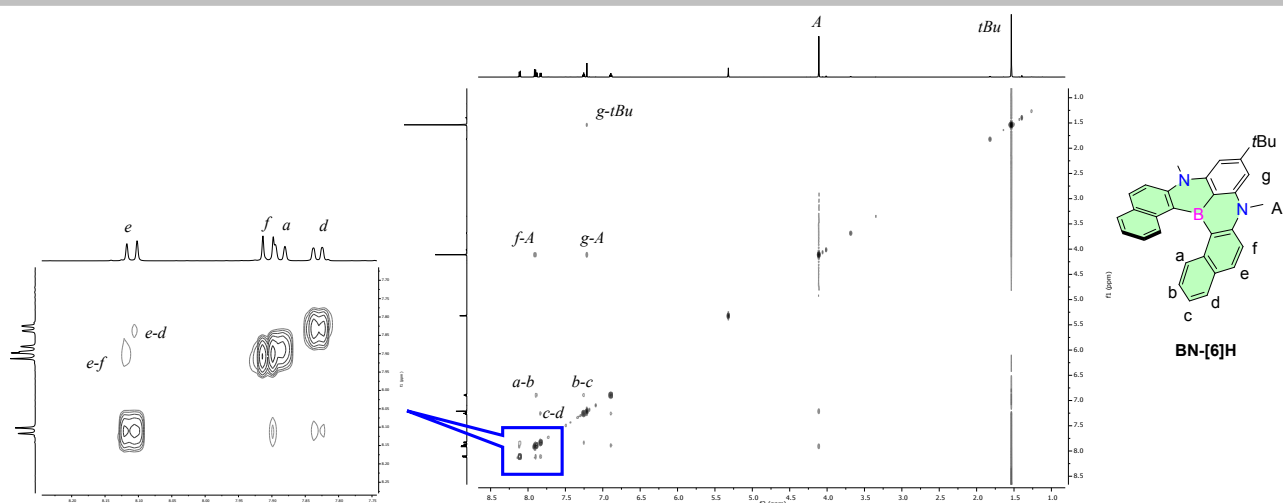

Figure S44 2D-NOESY spectrum of BN-[6]H in CD<sub>2</sub>Cl<sub>2</sub> (298 K).

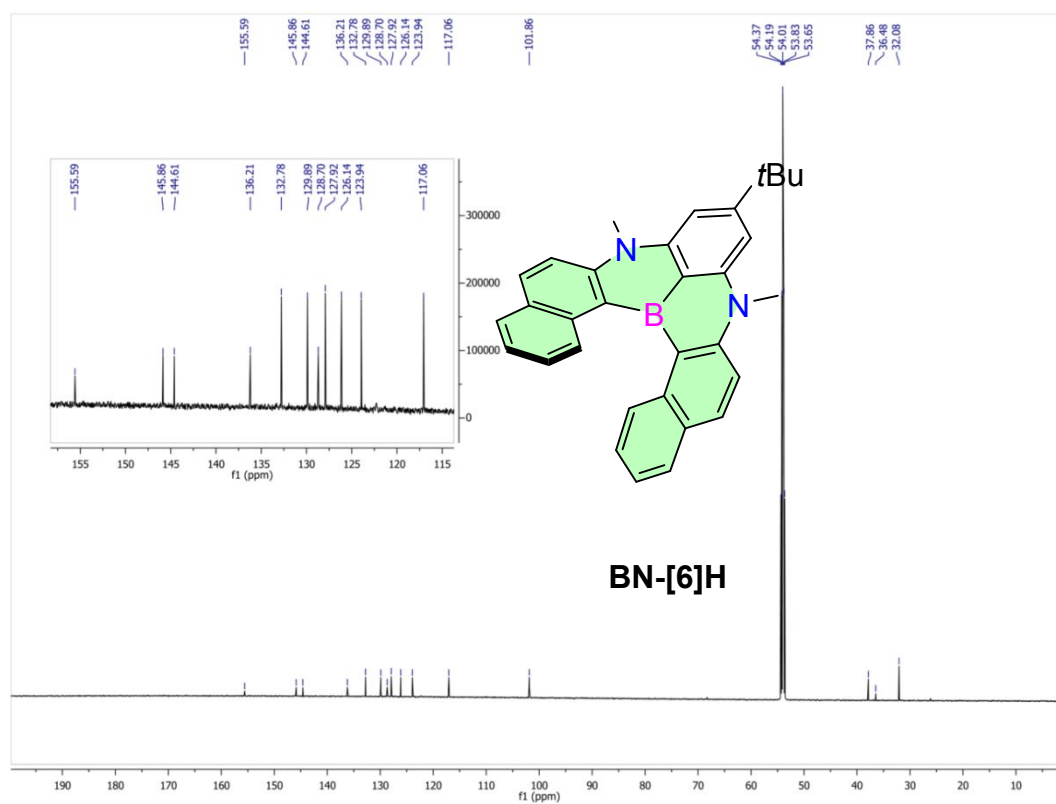

Figure S45 <sup>13</sup>C NMR spectrum of BN-[6]H in CD<sub>2</sub>Cl<sub>2</sub> (151 MHz, 298 K).

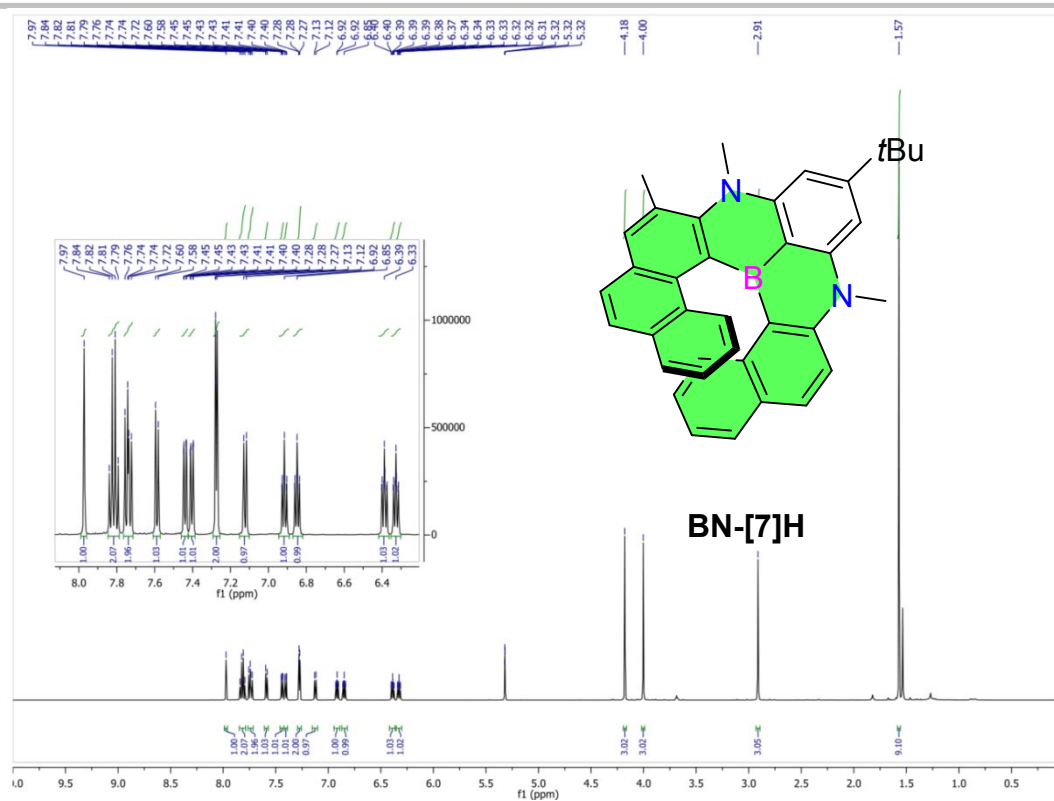

Figure S46  $^1\text{H}$  NMR spectrum of BN-[7]H in  $\text{CD}_2\text{Cl}_2$  (600 MHz, 298 K).

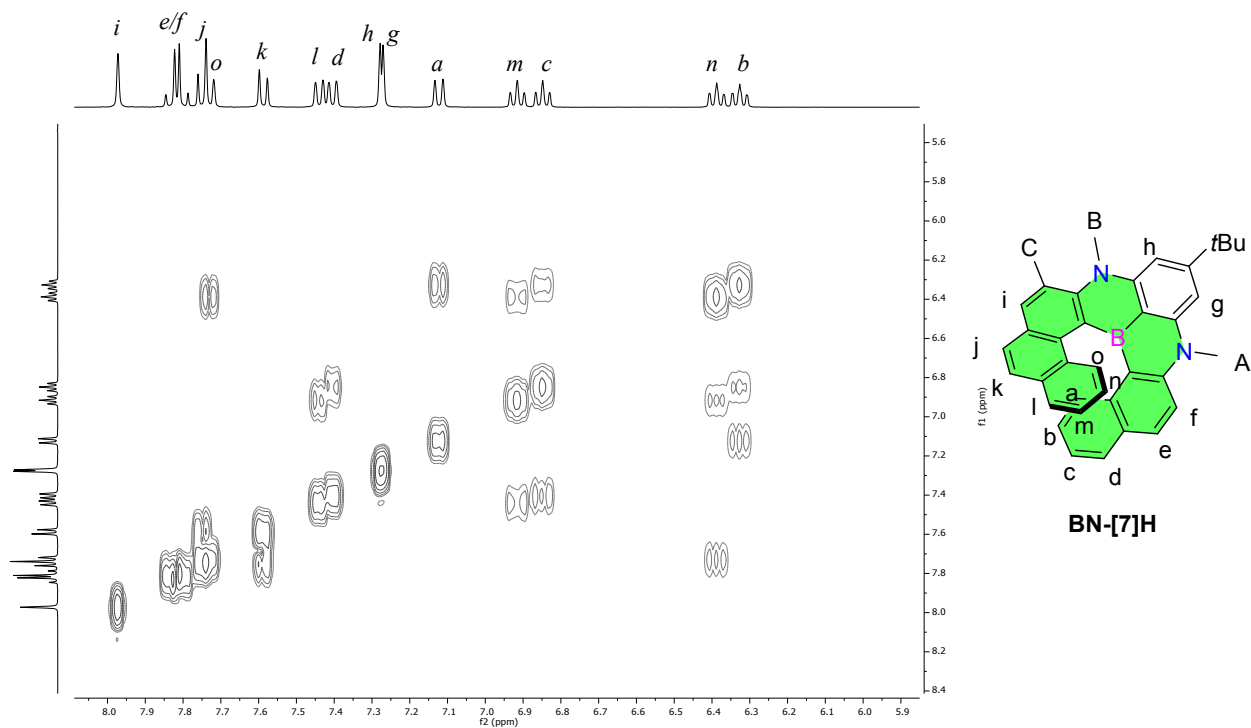

Figure S47  $^1\text{H}$ - $^1\text{H}$  COSY spectrum of BN-[7]H in  $\text{CD}_2\text{Cl}_2$  (298 K).

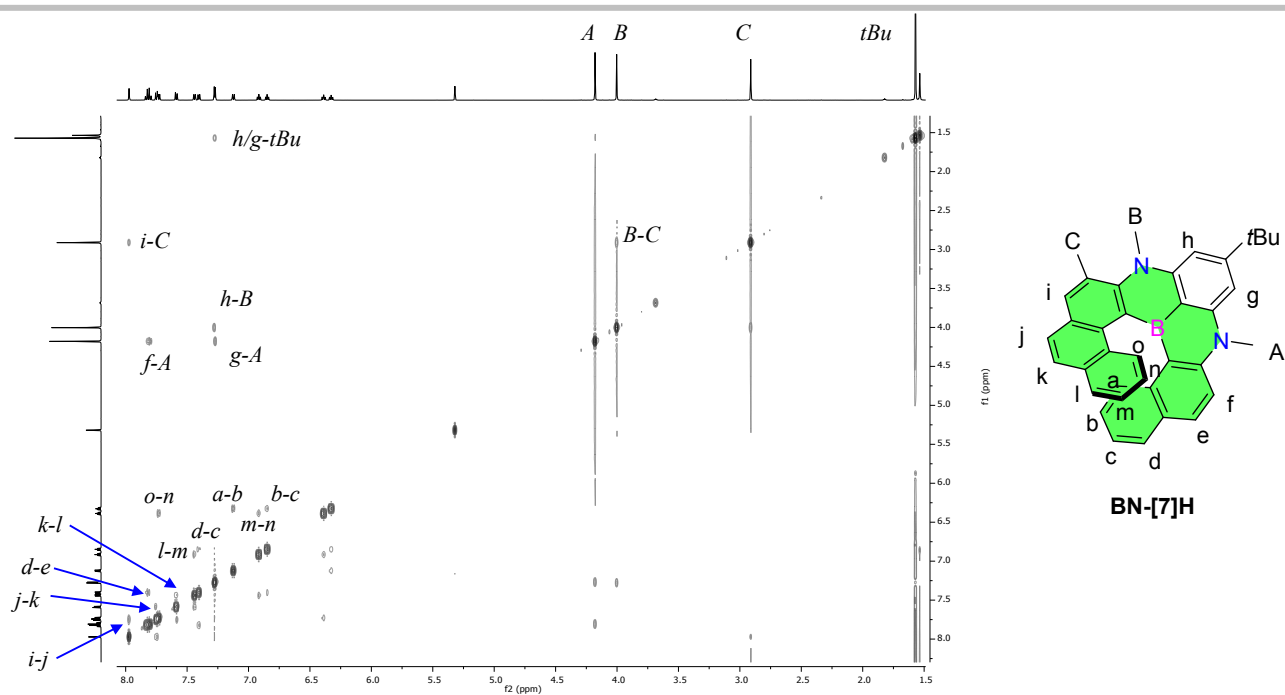

Figure S48 2D-NOesy spectrum of BN-[7]H in CD<sub>2</sub>Cl<sub>2</sub> (298 K).

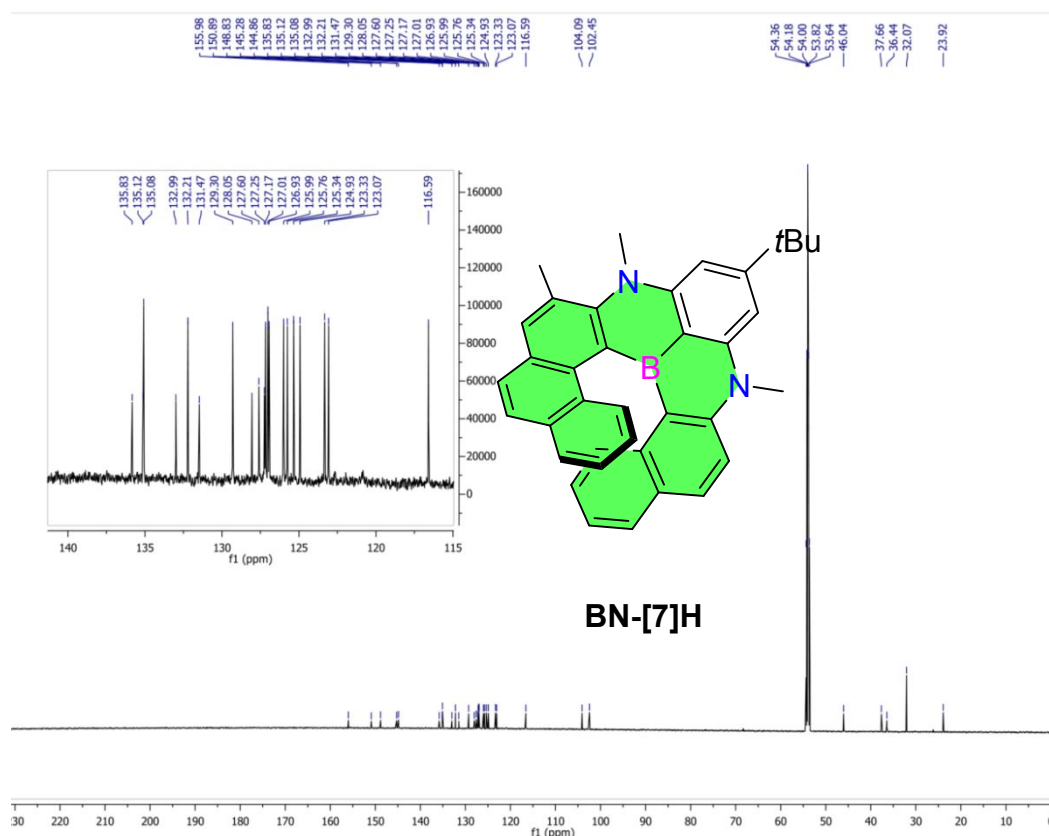

Figure S49 <sup>13</sup>C NMR spectrum of BN-[7]H in CD<sub>2</sub>Cl<sub>2</sub> (151 MHz, 298 K).

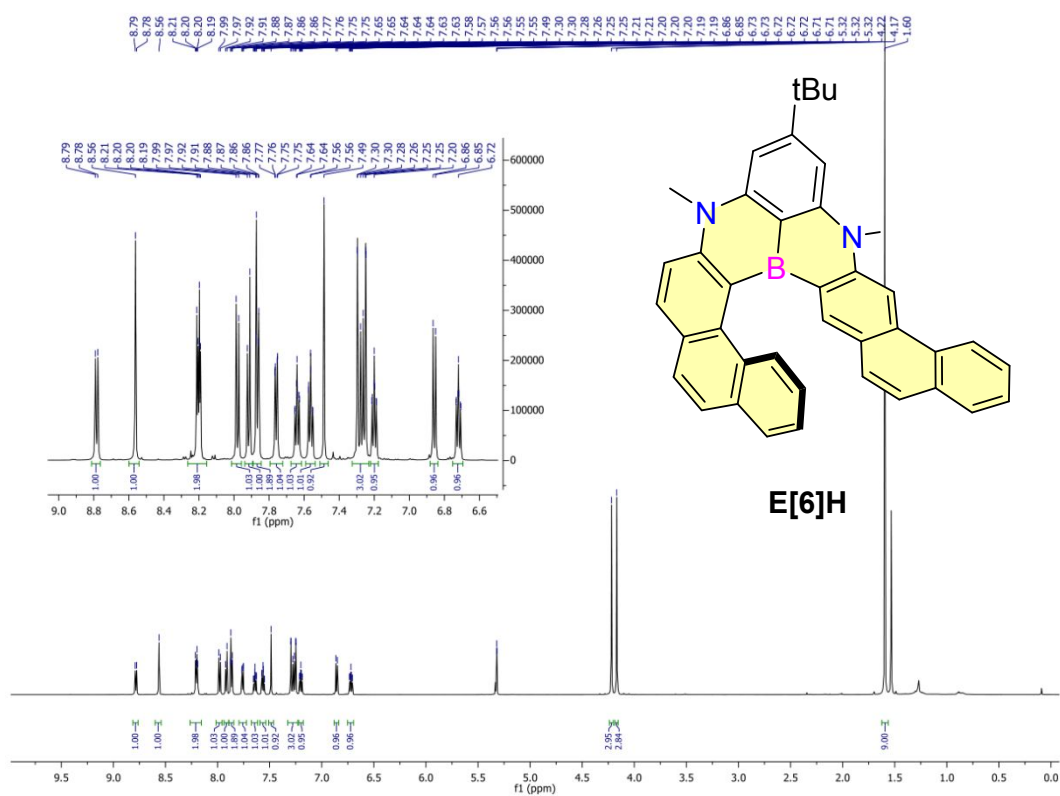

Figure S50  $^1\text{H}$  NMR spectrum of **E[6]H** in  $\text{CD}_2\text{Cl}_2$  (600 MHz, 298 K).

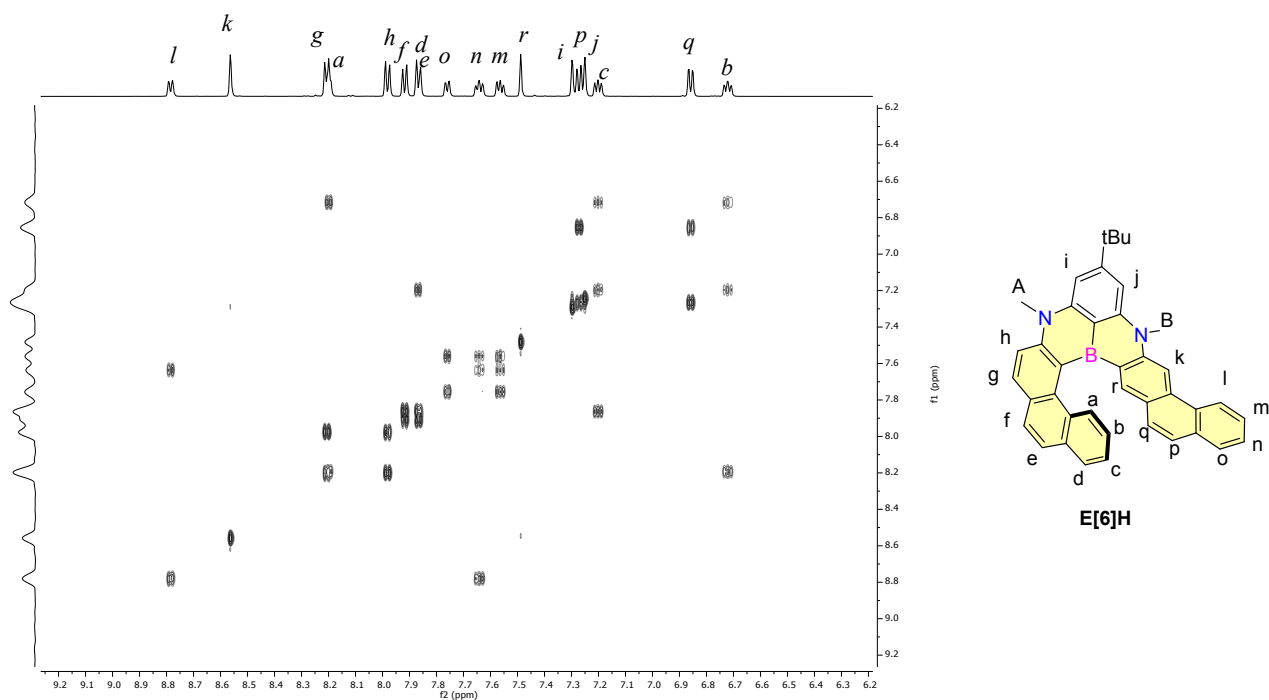

Figure S51  $^1\text{H}$ - $^1\text{H}$  COSY spectrum of **E[6]H** in  $\text{CD}_2\text{Cl}_2$  (298 K).

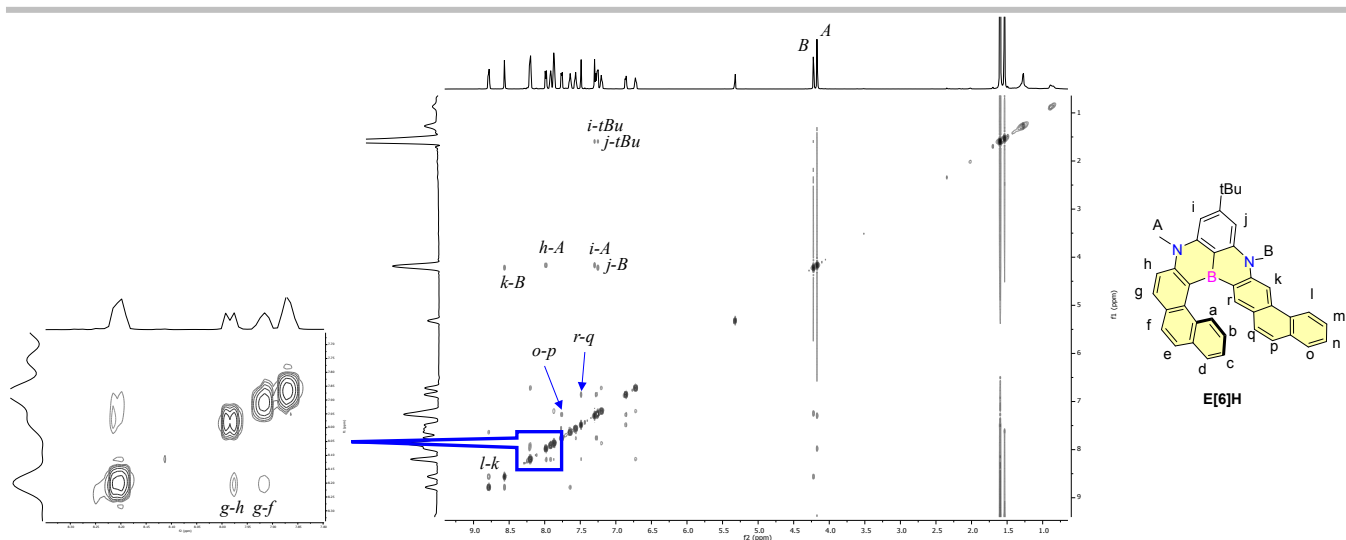

Figure S52 2D-NOESY spectrum of E[6]H in CD<sub>2</sub>Cl<sub>2</sub> (298 K).

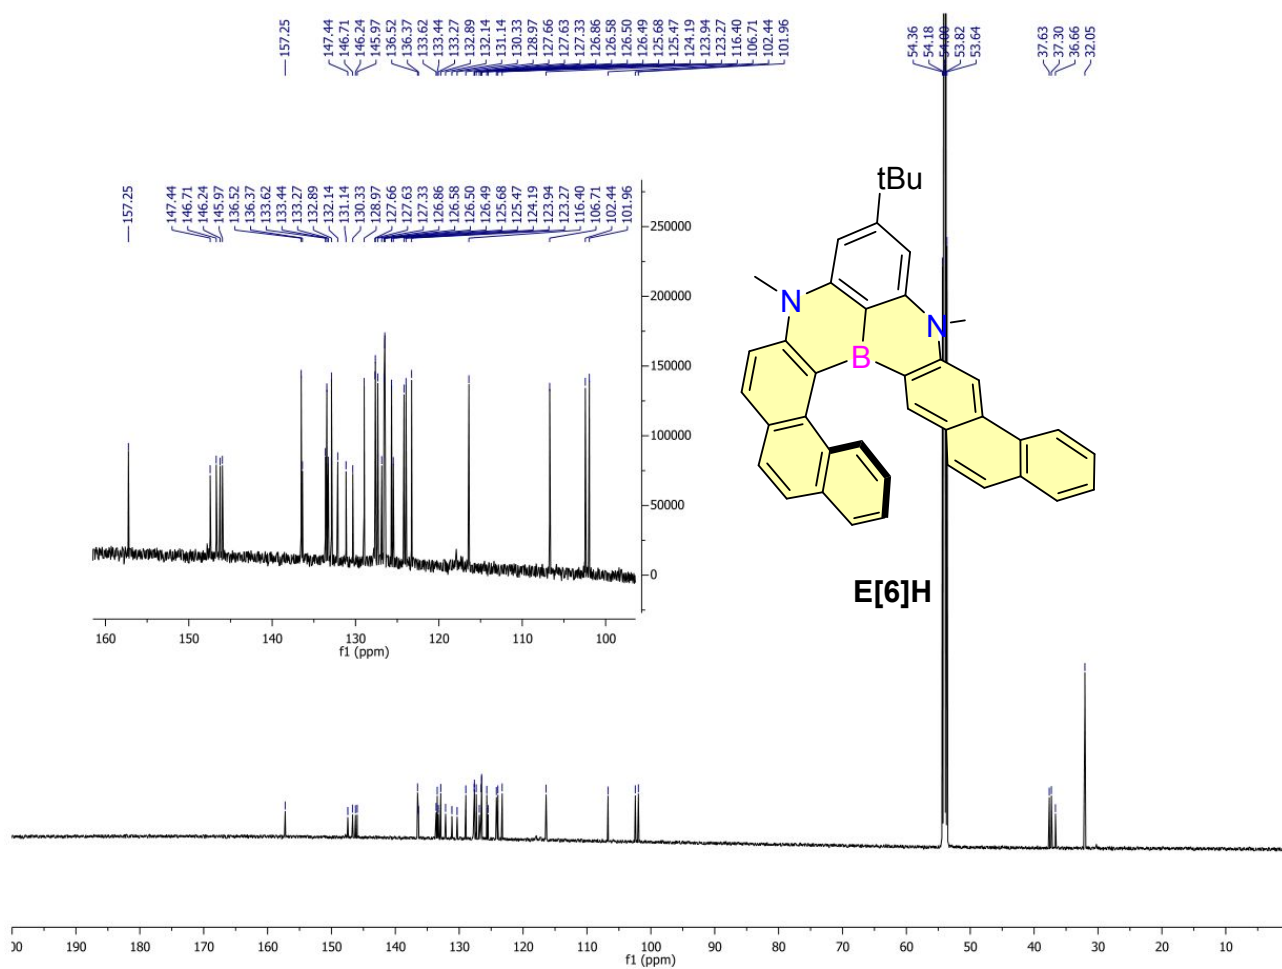

Figure S53 <sup>13</sup>C NMR spectrum of E[6]H in CD<sub>2</sub>Cl<sub>2</sub> (151 MHz, 298 K).

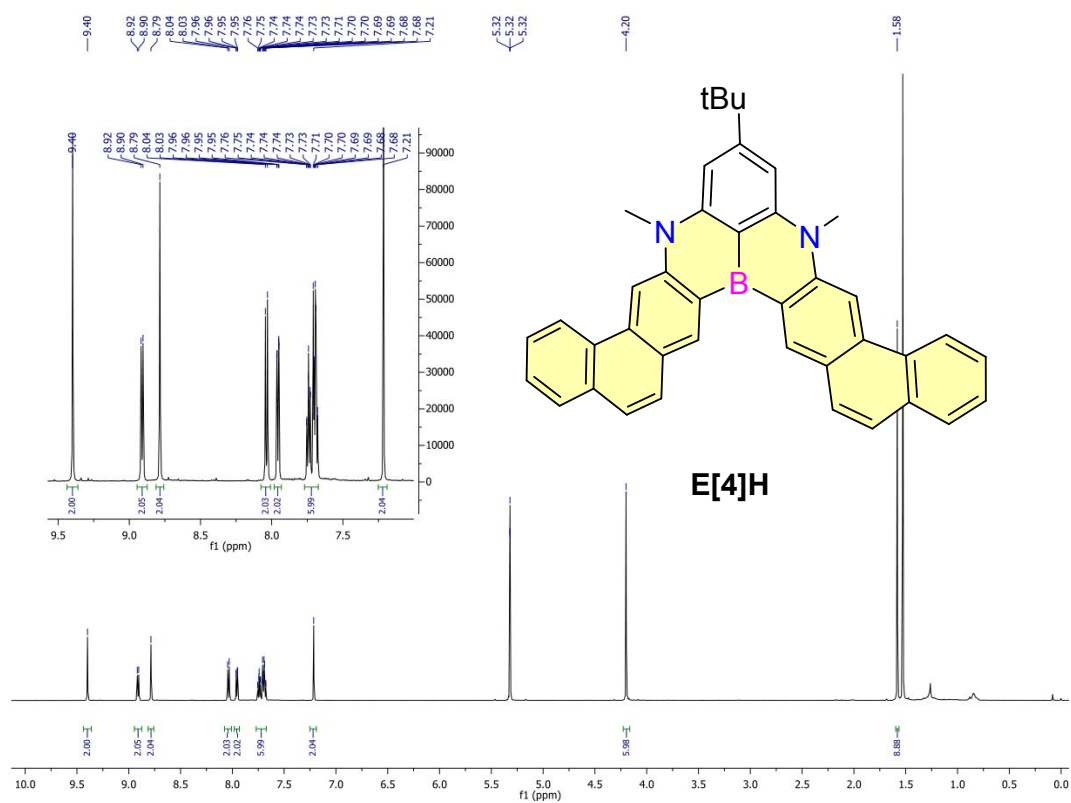

**Figure S54**  $^1\text{H}$  NMR spectrum of **E[4]H** in  $\text{CD}_2\text{Cl}_2$  (600 MHz, 298 K).

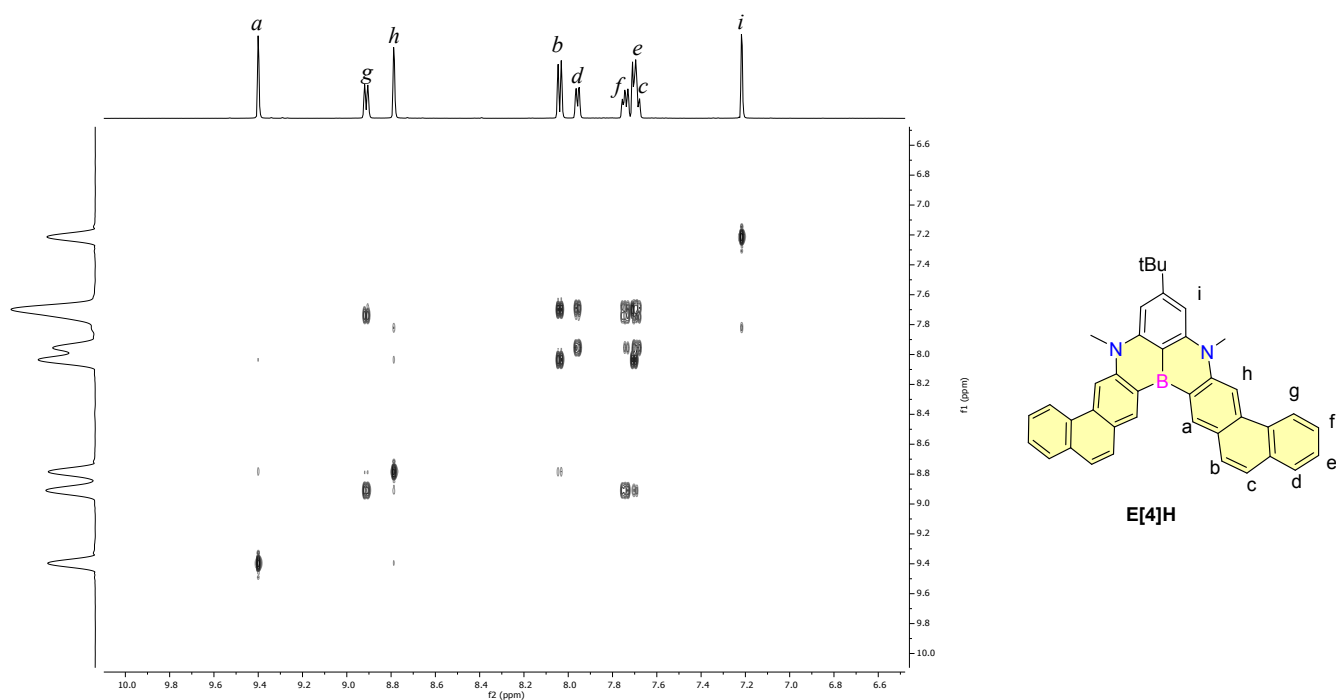

**Figure S55**  $^1\text{H}$ - $^1\text{H}$  COSY spectrum of **E[4]H** in  $\text{CD}_2\text{Cl}_2$  (298 K).

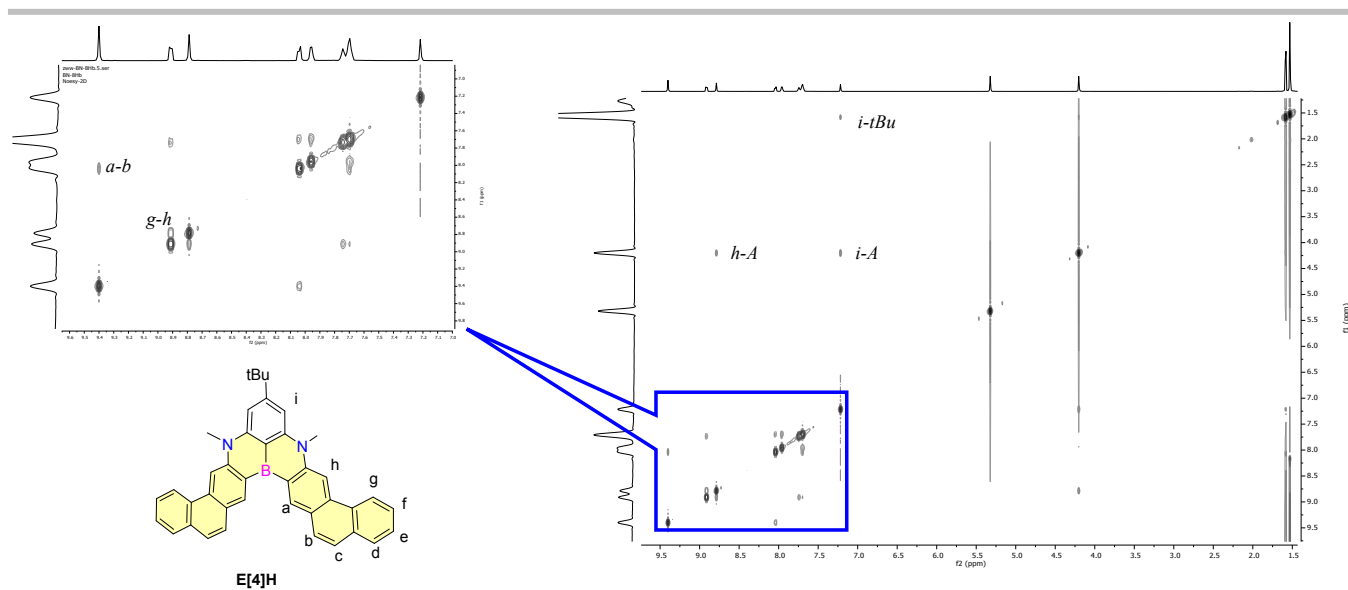

Figure S56 2D-NOESY spectrum of E[4]H in CD<sub>2</sub>Cl<sub>2</sub> (298 K).

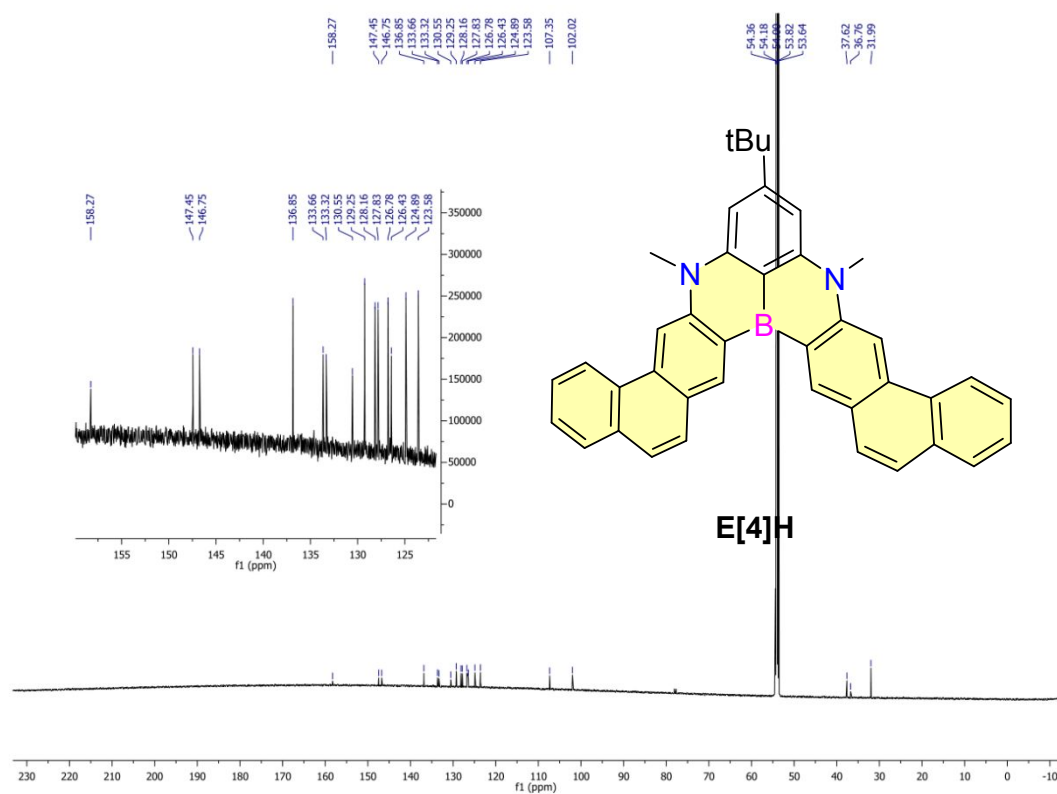

Figure S57 <sup>13</sup>C NMR spectrum of E[4]H in CD<sub>2</sub>Cl<sub>2</sub> (151 MHz, 298 K).





## High-resolution mass spectra

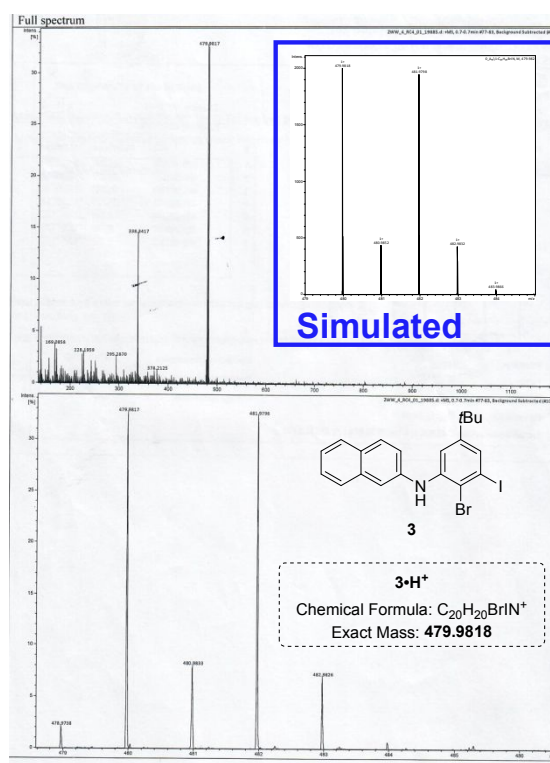

Figure S60 HR-ESI mass spectrum of compound 3.

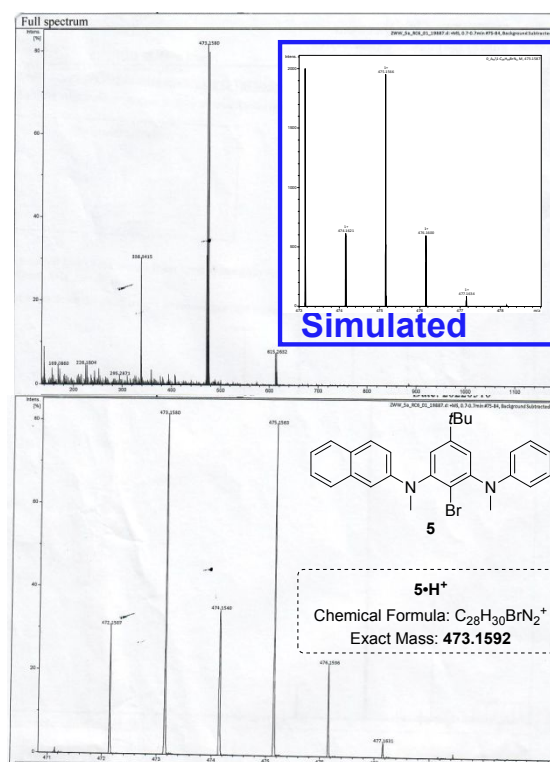

Figure S61 HR-ESI mass spectrum of compound 5.

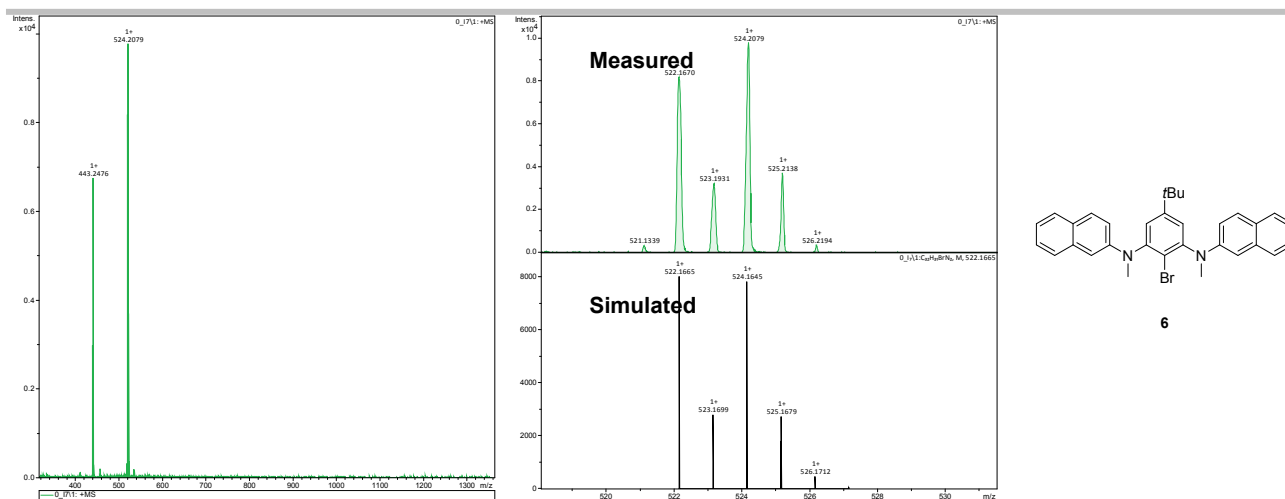

Figure S62 HR-MALDI-TOF mass spectrum of compound **6**.

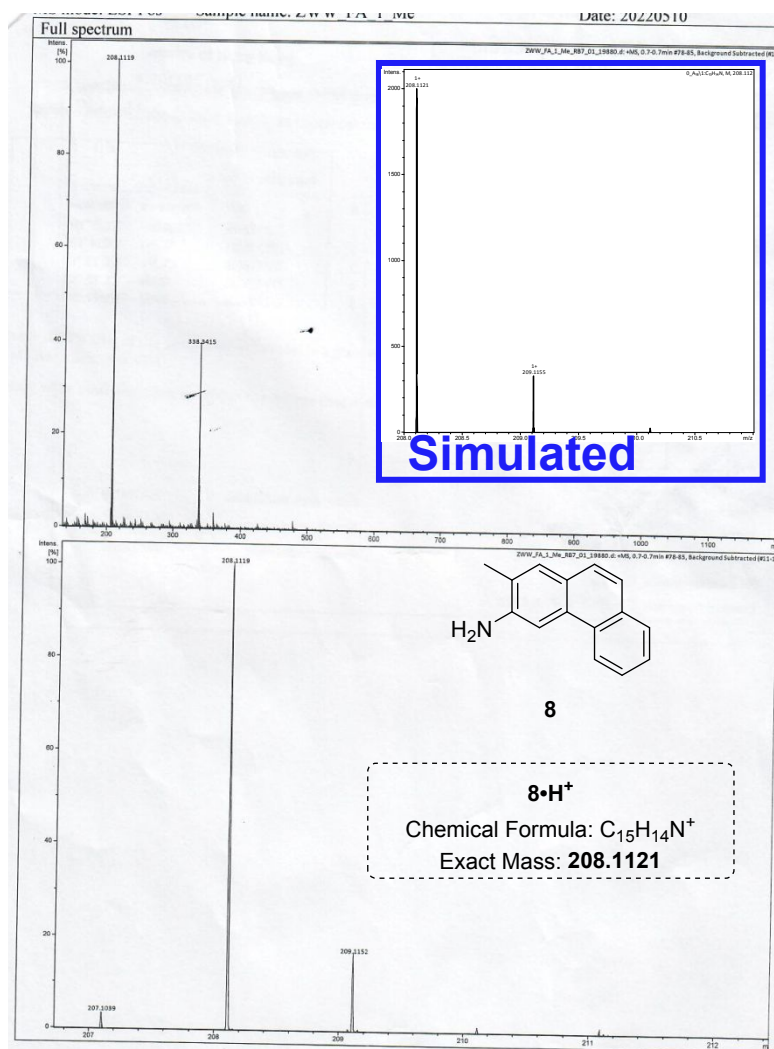

Figure S63 HR-ESI mass spectrum of compound **8**.

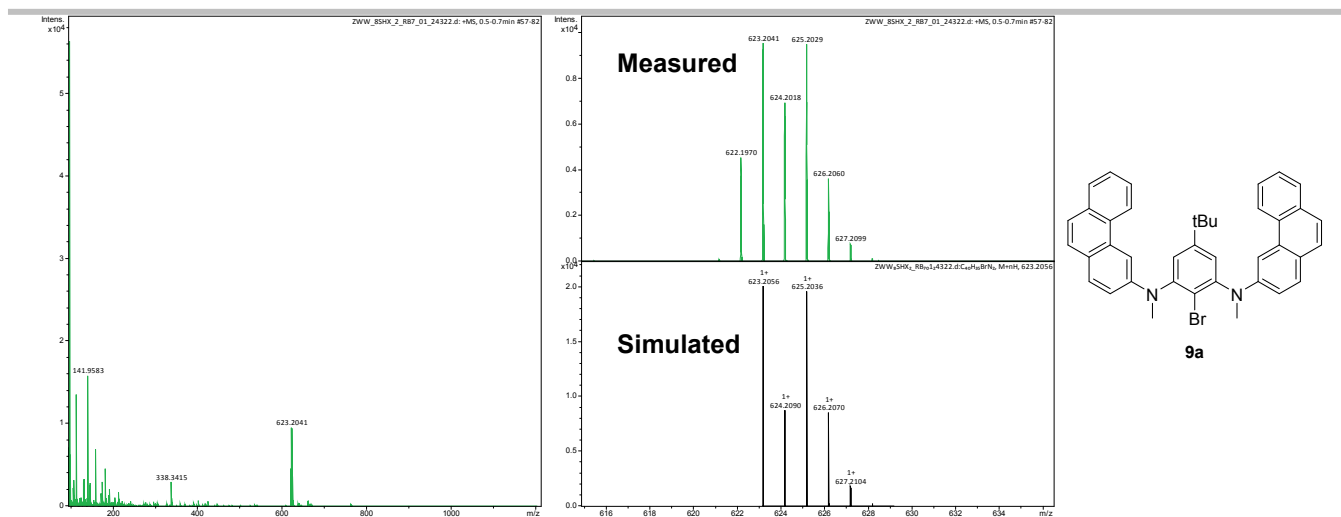

Figure S64 HR-ESI mass spectrum of compound **9a**.

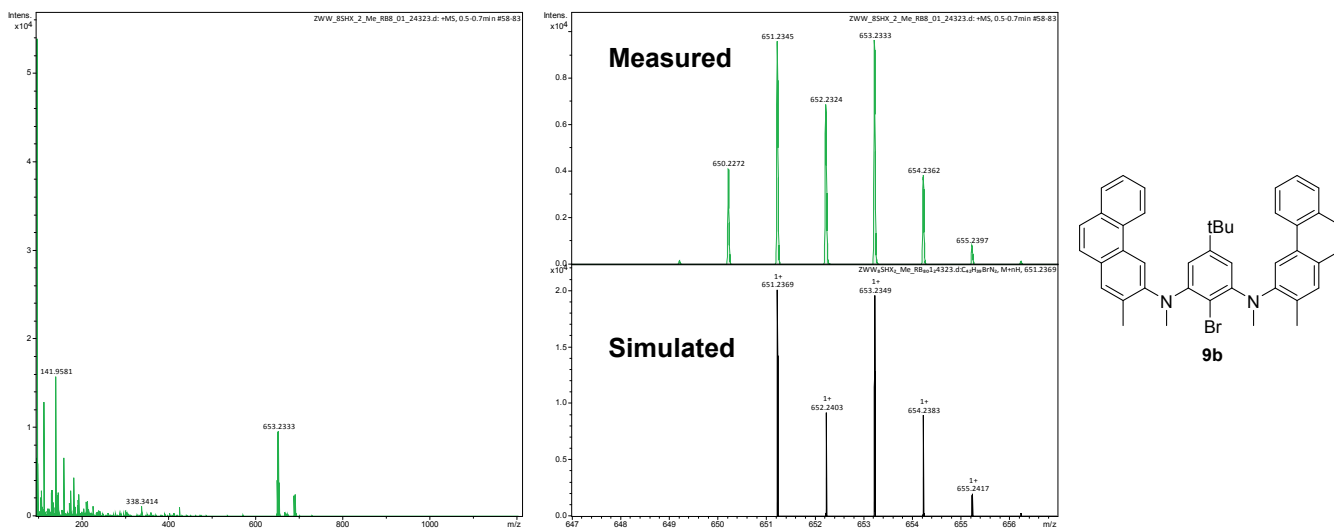

Figure S65 HR-ESI mass spectrum of compound **9b**.

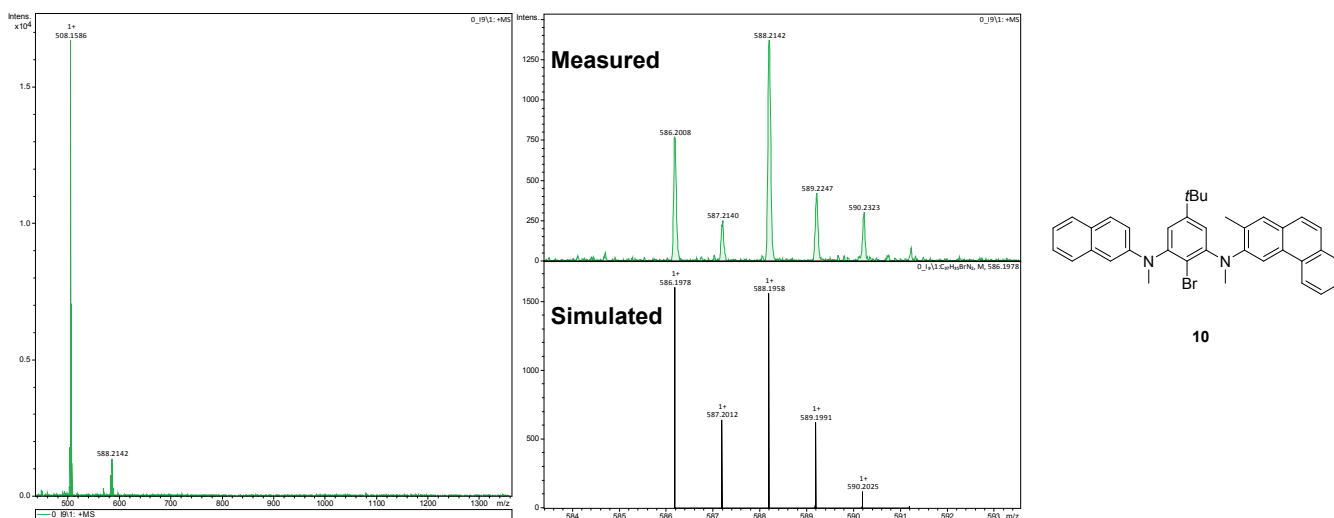

Figure S66 HR-MALDI-TOF mass spectrum of compound **10**.

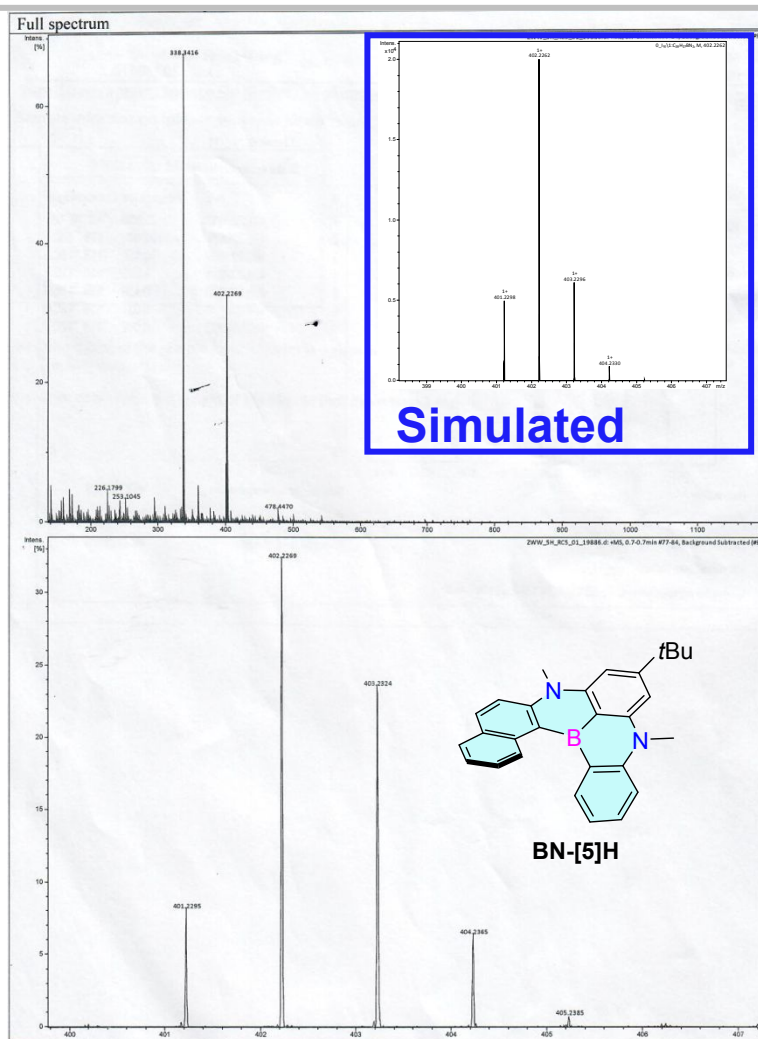

Figure S67 HR-ESI mass spectrum of BN-[5]H.

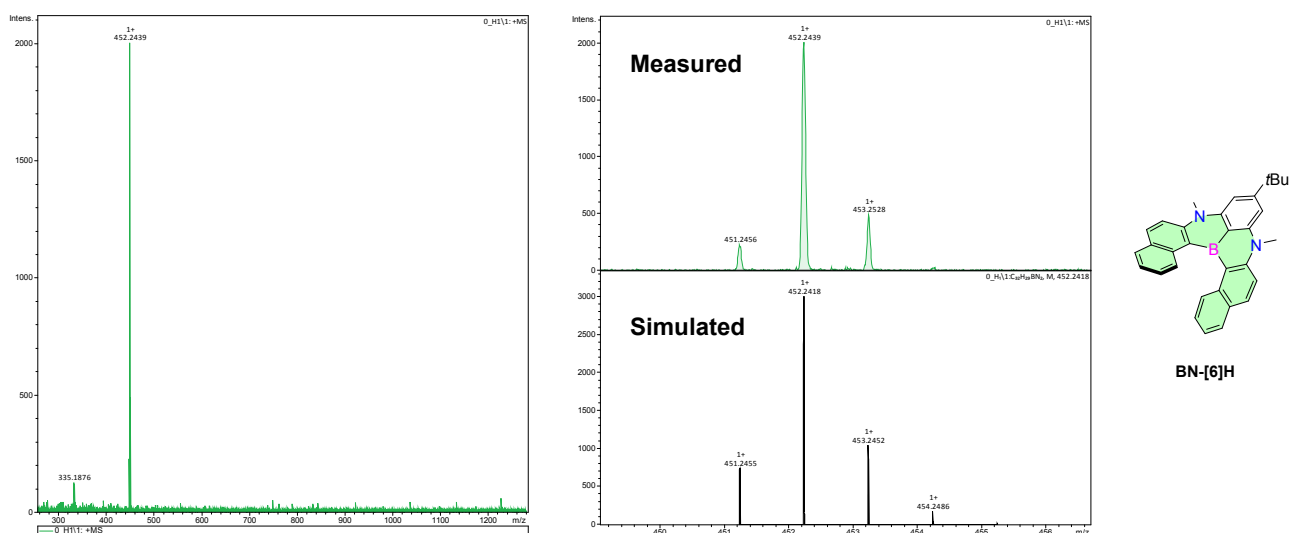

Figure S68 HR-MALDI-TOF mass spectrum of BN-[6]H.

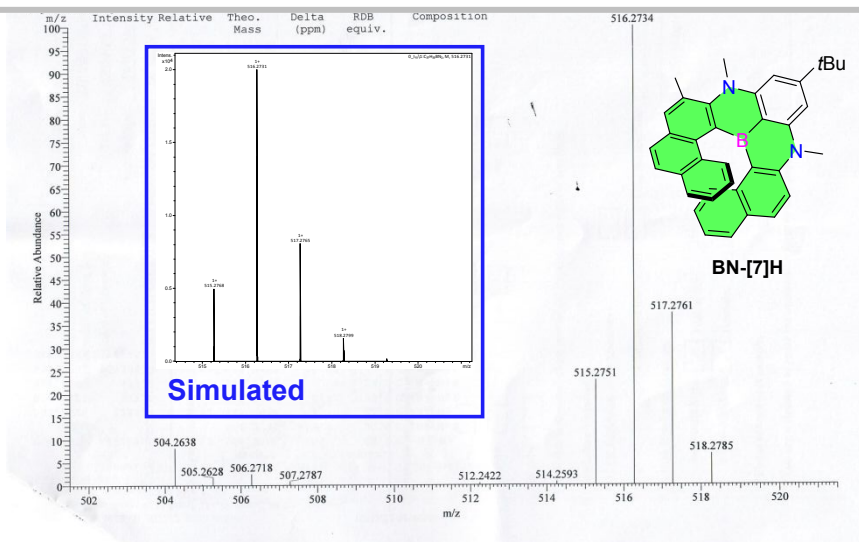

Figure S69 HR-EI mass spectrum of BN-[7]H.

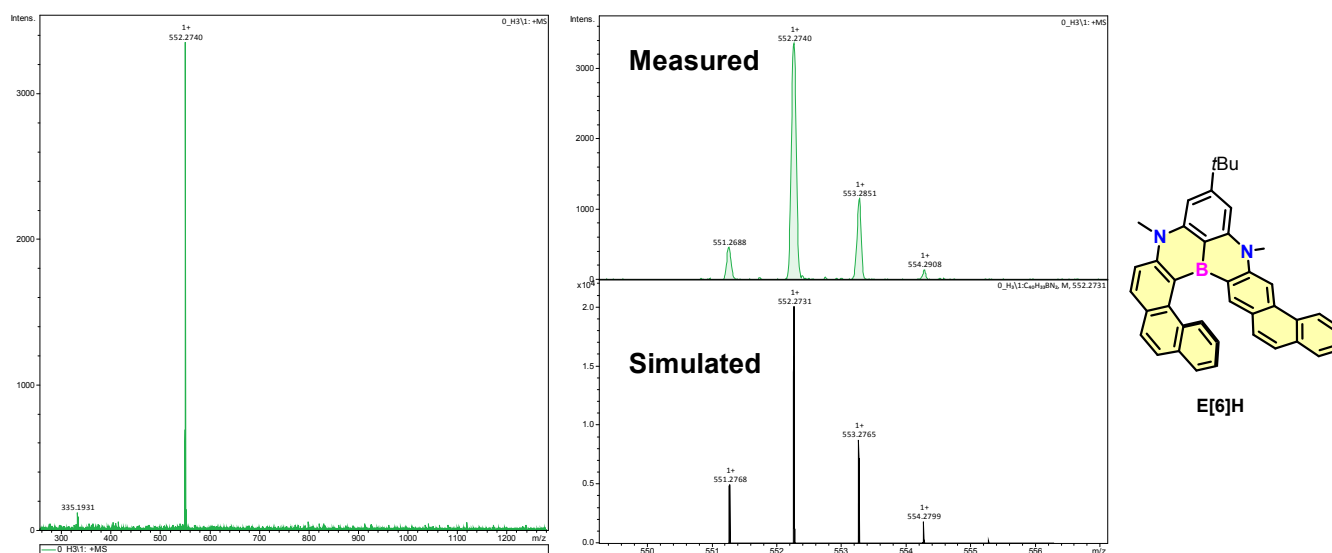

Figure S70 HR-MALDI-TOF mass spectrum of compound E[6]H.

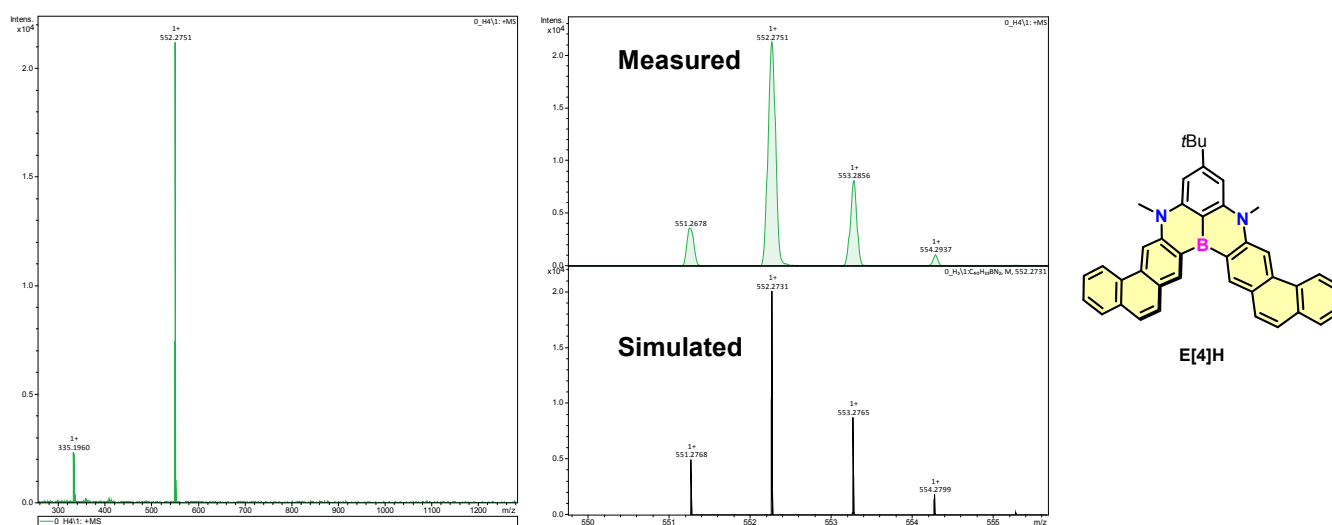

Figure S71 HR-MALDI-TOF mass spectrum of compound E[4]H.

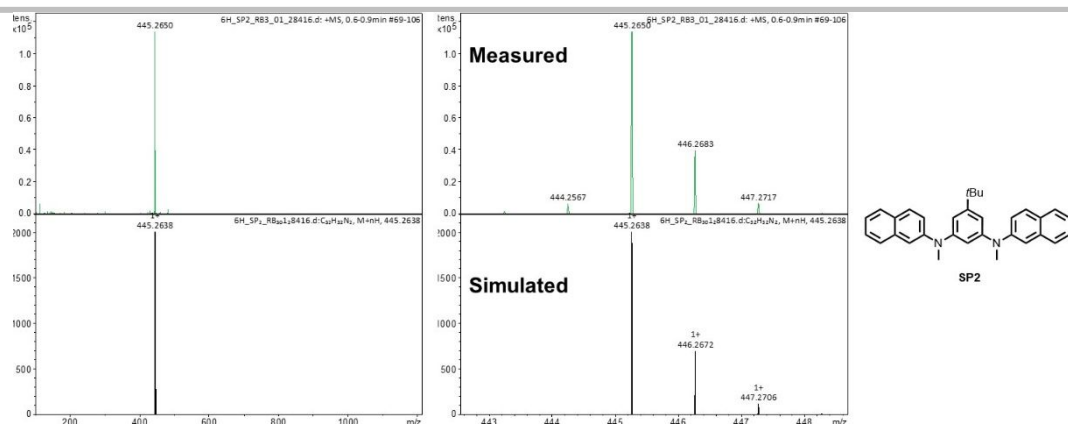

**Figure S72** HR-ESI mass spectrum of compound **SP2**.

---

## 8. References

- [S1] W. Yang, J. H. K. S. Monteiro, A. de Bettencourt-Dias, V. J. Catalano, W. A. Chalifoux, *Angew. Chem. Int. Ed.* **2016**, *55*, 10427-10430; *Angew. Chem.* **2016**, *128*, 10583-10586.
- [S2] X. Chang, Q. Zhang, C. Guo, *Org. Lett.* **2019**, *21*, 4915-4918.
- [S3] D. L. Fields, *J. Org. Chem.* **1971**, *36*, 3002-3005.
- [S4] J. E. Field, G. Muller, J. P. Riehl, D. Venkataraman, *J. Am. Chem. Soc.* **2003**, *125*, 11808-11809.
- [S5] H. Tanaka, M. Ikenosako, Y. Kato, M. Fujiki, Y. Inoue, T. Mori, *Commun. Chem.* **2018**, *1*, 38.
- [S6] K. Yuan, D. Volland, S. Kirschner, M. Uzelac, G. S. Nichol, A. Nowak-Król, M. J. Ingleson, *Chem. Sci.* **2022**, *13*, 1136-1145.
- [S7] H. Kubo, T. Hirose, T. Nakashima, T. Kawai, J.-Y. Hasegawa, K. Matsuda, *J. Phys. Chem. Lett.* **2021**, *12*, 686-695.
- [S8] J. Full, S. P. Panchal, J. Götz, A. M. Krause, A. Nowak-Król, *Angew. Chem. Int. Ed.* **2021**, *60*, 4350-4357; *Angew. Chem.* **2021**, *133*, 4396-4403.
- [S9] F. Saal, F. Zhang, M. Holzapfel, M. Stolte, E. Michail, M. Moos, A. Schmiedel, A. M. Krause, C. Lambert, F. Würthner, P. Ravat, *J. Am. Chem. Soc.* **2020**, *142*, 21298-21303.
- [S10] T. Yanagi, T. Tanaka, H. Yorimitsu, *Chem. Sci.* **2021**, *12*, 2784-2793.
- [S11] Y. Yamamoto, H. Sakai, J. Yuasa, Y. Araki, T. Wada, T. Sakanoue, T. Takenobu, T. Kawai, T. Hasobe, *J. Phys. Chem. C* **2016**, *120*, 7421-7427.
- [S12] M. J. Frisch, G. W. Trucks, H. B. Schlegel, G. E. Scuseria, M. A. Robb, J. R. Cheeseman, G. Scalmani, V. Barone, G. A. Petersson, H. Nakatsuji, X. Li, M. Caricato, A. V. Marenich, J. Bloino, B. G. Janesko, R. Gomperts, B. Mennucci, H. P. Hratchian, J. V. Ortiz, A. F. Izmaylov, J. L. Sonnenberg, D. Williams-Young, F. Ding, F. Lipparini, F. Egidi, J. Goings, B. Peng, A. Petrone, T. Henderson, D. Ranasinghe, V. G. Zakrzewski, J. Gao, N. Rega, G. Zheng, W. Liang, M. Hada, M. Ehara, K. Toyota, R. Fukuda, J. Hasegawa, M. Ishida, T. Nakajima, Y. Honda, O. Kitao, H. Nakai, T. Vreven, K. Throssell, J. A. Montgomery, Jr., J. E. Peralta, F. Ogliaro, M. J. Bearpark, J. J. Heyd, E. N. Brothers, K. N. Kudin, V. N. Staroverov, T. A. Keith, R. Kobayashi, J. Normand, K. Raghavachari, A. P. Rendell, J. C. Burant, S. S. Iyengar, J. Tomasi, M. Cossi, J. M. Millam, M. Klene, C. Adamo, R. Cammi, J. W. Ochterski, R. L. Martin, K. Morokuma, O. Farkas, J. B. Foresman, and D. J. Fox, Gaussian, Inc., Wallingford CT, **2016**.
- [S13] C. Adamo, V. Barone, *J. Chem. Phys.* **1999**, *110*, 6158-6170.
- [S14] a) A. D. Becke, *J. Chem. Phys.* **1993**, *98*, 5648. b) C. Lee, W. Yang, R. G. Parr, *Phys. Rev. B* **1988**, *37*, 785.
- [S15] W. J. Hehre, L. Radom, P. v. R. Schleyer, J. A. Pople, *Ab Initio Molecular Orbital Theory*; John Wiley & Sons: New York, 1986 and references cited therein.



- 
- [S16] a) A. Schäfer, C. Huber, R. Ahlrichs, *J. Chem. Phys.* **1994**, *100*, 5829-5835; b) F. Weigend, R. Ahlrichs, *Phys. Chem. Chem. Phys.* **2005**, *7*, 3297-3305; c) F. Weigend, *Phys. Chem. Chem. Phys.* **2006**, *8*, 1057-1065.
- [S17] a) M. E. Casida, C. Jamorski, K. C. Casida, D. R. Salahub, *J. Chem. Phys.* **1998**, *108*, 4439-4449.  
b) R. E. Stratmann, G. E. Scuseria, M. J. Frisch, *J. Chem. Phys.* **1998**, *109*, 8218-8224.
- [S18] J. Tomasi, B. Mennucci, R. Cammi, *Chem. Rev.* **2005**, *105*, 2999-3093.
- [S19] S. Grimme, S. Ehrlich, L. Goerigk, *J. Comput. Chem.* **2011**, *32*, 1456-1465.
- [S20] a) Z. Chen, C. S. Wannere, C. Corminboeuf, R. Puchta, P. V. R. Schleyer, *Chem. Rev.* **2005**, *105*, 3842-3888. b) P. V. R. Schleyer, C. Maerker, A. Dransfeld, H. Jiao, N. J. R. van Eikema Hommes, *J. Am. Chem. Soc.* **1996**, *118*, 6317-6318.
- [S21] a) T. Lu, Q. Chen, *J. Comput. Chem.* **2022**, *43*, 539-555; b) T. Lu, F. Chen, *J. Comput. Chem.* **2012**, *33*, 580-592.
